# Supplementary material
Source: publisher site journal article supplement (https://www.dovepress.com/article/375088)
Supplement: Supplementary file 1 [file get_supplementary_file.php]

Supplementary table 1

## Upregulated genes in TBI kidney compared with Sham group

| Entrez ID | SYMBOL      | logFC       | logCPM      | P-Value     | FDR         |
|-----------|-------------|-------------|-------------|-------------|-------------|
| 4633      | MYL2        | 9.454189763 | 11.38685885 | 0           | 0           |
| 5730      | PTGDS       | 9.122937615 | 8.490282378 | 3.929E-300  | 3.5315E-297 |
| 58        | ACTA1       | 8.5507345   | 8.265021057 | 0           | 0           |
| 79442     | LRRC2       | 7.271604581 | 7.147132928 | 1.5525E-243 | 8.4723E-241 |
| 1917      | EEF1A2      | 7.25786712  | 9.299140738 | 4.3074E-307 | 4.3879E-304 |
| 284723    | SLC25A34    | 7.030726065 | 6.81761613  | 5.162E-171  | 7.2363E-169 |
| 4892      | NRAP        | 6.756693923 | 8.634103143 | 1.535E-269  | 1.2345E-266 |
| 84676     | TRIM63      | 6.75179168  | 8.830782936 | 1.0943E-267 | 8.3602E-265 |
| 140456    | ASB11       | 6.75101645  | 7.21110502  | 1.662E-219  | 5.5209E-217 |
| 113622    | ADPRHL1     | 6.650190664 | 9.595695834 | 6.1966E-255 | 3.7874E-252 |
| 84808     | PERM1       | 6.626058849 | 8.923170276 | 3.9035E-215 | 1.147E-212  |
| 5350      | PLN         | 6.594893076 | 10.83214603 | 5.894E-273  | 5.0034E-270 |
| 56203     | LMOD3       | 6.582079742 | 6.864313418 | 3.8021E-221 | 1.291E-218  |
| 4607      | MYBPC3      | 6.531347985 | 10.26660715 | 6.572E-165  | 7.7845E-163 |
| 9172      | MYOM2       | 6.23176326  | 10.86719226 | 3.4554E-250 | 1.9555E-247 |
| 2274      | FHL2        | 6.507837158 | 9.693608517 | 4.7331E-266 | 3.4439E-263 |
| 376132    | LRRC10      | 6.502903984 | 8.29430695  | 2.0702E-250 | 1.2166E-247 |
| 167838    | TXLNB       | 6.464460642 | 5.594822515 | 1.5099E-233 | 7.9078E-231 |
| 6007      | RHD         | 6.414467348 | 4.838618484 | 2.3178E-203 | 6.0027E-201 |
| 142685    | ASB15       | 6.407493208 | 5.405373932 | 5.5746E-196 | 1.3309E-193 |
| 1346      | COX7A1      | 6.404608939 | 8.465671347 | 8.4207E-192 | 1.8922E-189 |
| 1158      | CKM         | 6.359819442 | 10.33737108 | 8.7398E-173 | 1.3093E-170 |
| 136371    | ASB10       | 6.31761003  | 6.54170014  | 3.6214E-206 | 9.7078E-204 |
| 54456     | MOV10L1     | 6.251265183 | 5.884738694 | 7.1176E-179 | 1.222E-176  |
| 53347     | UBASH3A     | 6.162312335 | 6.29751732  | 5.1129E-194 | 1.1837E-191 |
| 4634      | MYL3        | 6.157275523 | 10.65885207 | 9.8017E-227 | 3.6529E-224 |
| 442721    | LMOD2       | 6.133466974 | 8.089486593 | 5.9097E-190 | 1.2203E-187 |
| 2027      | ENO3        | 6.131835674 | 5.549980126 | 8.9123E-231 | 3.7828E-228 |
| 57159     | TRIM54      | 6.127285046 | 6.778926134 | 4.7032E-175 | 7.6452E-173 |
| 8736      | MYOM1       | 6.123435545 | 8.999429069 | 3.4326E-227 | 1.3449E-224 |
| 161247    | FITM1       | 6.116771391 | 7.956371725 | 4.9307E-187 | 9.6592E-185 |
| 2258      | FGF13       | 6.087570383 | 6.064735353 | 1.679E-172  | 2.4668E-170 |
| 129446    | XIRP2       | 6.076044979 | 9.6092649   | 1.0464E-238 | 5.2397E-236 |
| 148738    | HJV         | 6.062955804 | 8.639716326 | 2.8316E-200 | 7.0929E-198 |
| 6262      | RYSR2       | 6.054032882 | 9.172939648 | 9.9742E-235 | 4.9163E-232 |
| 286006    | LSMEM1      | 6.035718031 | 6.628670134 | 2.0909E-183 | 3.8963E-181 |
| 57408     | LRTM1       | 6.032890842 | 5.873384605 | 5.6059E-167 | 7.0211E-165 |
| 1160      | KMT2        | 6.000965465 | 10.90053695 | 2.5203E-204 | 6.6398E-202 |
| 80206     | FHOD3       | 5.976941573 | 7.890596594 | 1.1722E-177 | 1.9468E-175 |
| 150572    | SMYD1       | 5.94537324  | 9.036081059 | 2.4604E-229 | 9.8934E-227 |
| 417       | ART1        | 5.944531288 | 7.32502354  | 1.1625E-178 | 6.5428E-181 |
| 343641    | TGM6        | 5.938814456 | 7.517733766 | 4.2425E-143 | 3.3764E-141 |
| 8823      | FGF16       | 5.926906671 | 4.287592804 | 8.4261E-164 | 9.6805E-162 |
| 57538     | ALPK3       | 5.893658639 | 6.956747162 | 3.0883E-195 | 7.26E-193   |
| 84033     | OBSCN       | 5.892008836 | 7.458816739 | 3.6624E-167 | 4.6249E-165 |
| 51676     | ASB2        | 5.882765032 | 8.793031211 | 1.0509E-166 | 1.3055E-164 |
| 12372     | FSD2        | 5.88164719  | 7.623219645 | 8.4117E-197 | 2.0402E-194 |
| 3270      | HRC         | 5.870946318 | 9.912374264 | 6.3441E-240 | 3.3427E-237 |
| 115701    | ALPK2       | 5.786666747 | 7.442240558 | 9.2243E-172 | 1.3051E-169 |
| 100526835 | FPGT-TNNI3K | 5.770644658 | 7.724662527 | 5.6781E-155 | 5.4567E-153 |
| 493829    | TRIM72      | 5.765375183 | 6.802877343 | 1.4591E-111 | 6.6951E-110 |
| 4879      | NPPB        | 5.754912296 | 7.8775227   | 2.2369E-188 | 4.4973E-186 |
| 5224      | PGAM2       | 5.73774246  | 10.28182699 | 2.0559E-187 | 4.0798E-185 |
| 84665     | MYPN        | 5.743034767 | 6.208214072 | 5.2518E-175 | 8.4472E-173 |
| 252995    | FNDCC5      | 5.725324893 | 8.792396231 | 1.8903E-197 | 4.6586E-195 |
| 8975      | USP13       | 5.710082061 | 7.379204264 | 2.5756E-173 | 3.9753E-171 |
| 26548     | ITGB1BP2    | 5.67008101  | 6.992823277 | 9.2604E-178 | 1.5549E-175 |
| 84530     | SRRM4       | 5.638446579 | 3.413808511 | 1.0383E-131 | 7.0512E-130 |
| 338872    | C1QTNF9     | 5.625138949 | 5.759901801 | 3.0149E-166 | 3.6561E-164 |
| 2053      | EPHX2       | 5.604715577 | 8.945412483 | 4.8815E-189 | 9.9452E-187 |
| 27129     | HSPB7       | 5.596802976 | 9.879793389 | 6.4708E-232 | 2.825E-229  |
| 390213    | DOC2GP      | 5.5823657   | 8.044080901 | 3.1781E-139 | 2.3804E-137 |
| 202333    | CMYA5       | 5.564400334 | 8.896358286 | 1.2484E-190 | 2.6131E-188 |
| 42931     | MLF1        | 5.560007655 | 6.864299901 | 3.8648E-159 | 3.9634E-157 |
| 6710      | SPTB        | 5.552196827 | 6.7026874   | 5.5279E-173 | 8.4466E-171 |
| 10930     | APOBEC2     | 5.551544513 | 7.213156466 | 8.8401E-159 | 9.0051E-157 |
| 11155     | LDB3        | 5.540110123 | 5.121401918 | 1.1276E-161 | 1.2049E-159 |
| 347273    | CAVIN4      | 5.534397039 | 6.589149784 | 5.3043E-128 | 3.2947E-126 |
| 1949      | EFNB3       | 5.531473327 | 5.117811991 | 1.1295E-168 | 1.7979E-166 |
| 1000      | CDH2        | 5.52817616  | 7.120131223 | 2.6666E-169 | 3.5742E-167 |
| 9464      | HAND2       | 5.511001039 | 7.374815412 | 7.7313E-133 | 5.444E-131  |
| 9472      | AKAP6       | 5.510165478 | 6.466897751 | 8.9971E-171 | 1.2498E-168 |
| 6445      | SGCG        | 5.492537228 | 7.935674981 | 1.6048E-191 | 3.503E-189  |
| 389257    | LRRC14B     | 5.492514124 | 5.7837319   | 3.3283E-141 | 2.5176E-139 |
| 8490      | RG55        | 5.468901796 | 5.915071525 | 9.4562E-154 | 8.8105E-152 |
| 6331      | SCN5A       | 5.434155564 | 9.242312668 | 6.1015E-184 | 1.151E-181  |
| 2103      | ESRRB       | 5.419420397 | 4.976985703 | 6.7779E-158 | 6.7691E-156 |
| 6450      | SH3BGR      | 5.415428993 | 7.056037557 | 4.7853E-172 | 6.8981E-170 |
| 23676     | SMXP        | 5.397126493 | 8.526993093 | 1.5858E-162 | 1.7433E-160 |
| 283807    | FBXL22      | 5.390538515 | 7.034721773 | 1.223E-116  | 6.0674E-115 |
| 23305     | ACSL6       | 5.390517477 | 7.350136529 | 7.7104E-117 | 8.8071E-115 |
| 57467     | HHATL       | 5.378010909 | 7.098140028 | 3.5056E-147 | 2.9925E-145 |
| 54997     | TESC        | 5.373112255 | 8.711079984 | 8.0575E-175 | 1.2825E-172 |
| 90523     | MLIP        | 5.342090423 | 6.803246891 | 1.8402E-159 | 1.9392E-157 |
| 1482      | NKX2-5      | 5.326926787 | 5.423346599 | 1.9296E-151 | 1.7656E-149 |
| 440503    | PLIN5       | 5.309372591 | 7.112444079 | 1.6834E-163 | 1.9196E-161 |
| 11149     | BVES        | 5.301564765 | 6.638603341 | 2.1761E-168 | 2.8179E-166 |
| 10699     | CORIN       | 5.298439434 | 7.815316517 | 5.7714E-113 | 2.7303E-111 |
| 845       | CASQ2       | 5.291625488 | 10.37780985 | 6.4657E-218 | 2.1021E-215 |
| 23066     | CAND2       | 5.277497116 | 5.188799026 | 2.4071E-148 | 2.1018E-146 |
| 88        | ACTN2       | 5.274189362 | 10.26608161 | 9.9889E-181 | 1.7544E-178 |
| 377007    | KLHL30      | 5.255202505 | 5.930373718 | 2.4706E-158 | 2.5001E-156 |
| 6345      | SRL         | 5.249271053 | 9.815807908 | 6.5016E-209 | 1.8063E-206 |
| 3751      | KCND2       | 5.222977348 | 5.219209453 | 1.2027E-141 | 9.189E-140  |
| 5506      | PPP1R3A     | 5.2225753   | 6.902854814 | 4.2471E-157 | 4.16E-155   |
| 3316      | HSPB2       | 5.21183952  | 7.306295313 | 1.6462E-154 | 1.5624E-152 |

## Downregulated genes in TBI kidney compared with Sham group

| Entrez ID | SYMBOL   | logFC       | logCPM      | P-Value     | FDR         |
|-----------|----------|-------------|-------------|-------------|-------------|
| 10568     | SLC34A2  | -11.8603883 | 8.983805161 | 0           | 0           |
| 653509    | SFTPA1   | -11.1841004 | 9.550220206 | 0           | 0           |
| 51297     | BP1FA1   | -10.6565024 | 8.728776277 | 0           | 0           |
| 6441      | SFTPD    | -10.6380346 | 9.753691651 | 0           | 0           |
| 117156    | SCGB3A2  | -10.4055304 | 9.688390255 | 0           | 0           |
| 6439      | SFTPB    | -9.79097348 | 9.936981258 | 0           | 0           |
| 130120    | REG3B    | -9.69865135 | 8.214664614 | 0           | 0           |
| 6440      | SFTPC    | -9.63731828 | 9.681632171 | 0           | 0           |
| 283152    | CCDC153  | -9.29797707 | 6.224086302 | 1.1254E-119 | 5.9917E-118 |
| 114569    | MAL2     | -8.97680066 | 8.951929771 | 0           | 0           |
| 266629    | SEC14L3  | -8.95491042 | 7.888550221 | 0           | 0           |
| 4072      | EPCAM    | -8.93842609 | 5.912542383 | 3.082E-256  | 2.0475E-253 |
| 7356      | SCGB1A1  | -8.86442544 | 10.01455568 | 0           | 0           |
| 3169      | FOXA1    | -8.82823097 | 5.165194199 | 7.2904E-222 | 2.5318E-219 |
| 4070      | TACSTD2  | -8.74586738 | 5.039662949 | 1.2388E-201 | 3.1549E-199 |
| 389177    | TMEM212  | -8.69526069 | 5.117942717 | 3.2813E-259 | 2.279E-256  |
| 6340      | SCNN1G   | -8.42443237 | 6.558922118 | 8.2427E-129 | 5.2479E-127 |
| 7080      | NKX2-1   | -8.39399264 | 6.994176622 | 4.173E-232  | 1.8754E-229 |
| 10406     | WFDC2    | -8.32523126 | 8.068463008 | 7.8974E-302 | 7.542E-299  |
| 177       | AGER     | -8.30202021 | 9.546631306 | 0           | 0           |
| 4582      | MUC1     | -7.86743833 | 6.210438006 | 3.7867E-230 | 1.5638E-227 |
| 7802      | DNALI1   | -7.74593048 | 3.47442186  | 3.0186E-125 | 1.7672E-123 |
| 2294      | FOXF1    | -7.65259901 | 7.15549113  | 4.458E-255  | 2.8382E-252 |
| 84688     | C9orf24  | -7.63802121 | 5.963980181 | 2.7674E-233 | 1.2814E-230 |
| 795       | S100G    | -7.62140888 | 4.707860391 | 3.9793E-193 | 9.0753E-191 |
| 92747     | BP1FB1   | -7.59617508 | 7.676591722 | 3.1745E-206 | 8.6618E-204 |
| 133690    | CAPSL    | -7.59389432 | 5.398793401 | 6.6419E-227 | 2.5372E-224 |
| 27074     | LAMP3    | -7.39207068 | 4.081709092 | 4.3956E-174 | 6.9242E-172 |
| 886       | CCAR     | -7.35533078 | 4.950650682 | 9.2582E-214 | 2.6691E-211 |
| 56649     | TMPPRSS4 | -7.3532236  | 4.499450355 | 1.2959E-105 | 5.3954E-104 |
| 284340    | CXCL17   | -7.20898891 | 7.710932197 | 9.55781E-65 | 1.75322E-63 |
| 999       | CDH1     | -7.07623926 | 8.377991442 | 2.9017E-217 | 9.2372E-215 |
| 54845     | ESRP1    | -6.97461829 | 5.092144118 | 1.7234E-146 | 1.439E-144  |
| 64399     | HHIP     | -6.88150107 | 4.169645152 | 2.4512E-163 | 2.7744E-161 |
| 57716     | PRX      | -6.88021825 | 6.772563185 | 6.0505E-212 | 1.7121E-209 |
| 7103      | TSPAN8   | -6.81021489 | 6.4318804   | 4.8098E-217 | 1.4999E-214 |
| 122481    | AK7      | -6.7315904  | 4.875675322 | 4.3463E-181 | 7.8131E-179 |
| 3866      | KRT15    | -6.72800131 | 3.52780216  | 4.4711E-112 | 2.0702E-110 |
| 6696      | SPP1     | -6.72711811 | 7.011327955 | 1.4327E-224 | 5.2124E-222 |
| 29070     | CCDC113  | -6.66733615 | 4.866185615 | 2.3096E-159 | 2.4172E-157 |
| 362       | AQP5     | -6.62334752 | 7.164350769 | 1.5439E-215 | 4.7181E-213 |
| 221303    | FAM162B  | -6.57445501 | 4.145372227 | 8.545E-146  | 7.0577E-144 |
| 23286     | WWC1     | -6.38706498 | 6.518002855 | 4.0332E-181 | 7.3365E-179 |
| 131177    | FAM3D    | -6.38306498 | 1.87628148  | 4.17096E-93 | 1.37651E-91 |
| 1365      | CLDN3    | -6.36728136 | 6.758726017 | 3.702E-185  | 7.0708E-183 |
| 338557    | FFAR4    | -6.35815764 | 5.493874509 | 4.8322E-168 | 6.2047E-166 |
| 9495      | AKAP5    | -6.32252458 | 3.966398219 | 1.2139E-149 | 1.0808E-147 |
| 6657      | SOX2     | -6.30629069 | 4.289802313 | 6.4132E-155 | 6.12        |

Supplementary table 1

## Upregulated genes in TBI kidney compared with Sham group

| Entrez ID | SYMBOL   | logFC       | logCPM      | P-Value     | FDR         |
|-----------|----------|-------------|-------------|-------------|-------------|
| 54328     | GPR173   | 5.205170961 | 4.65510839  | 6.1937E-117 | 3.103E-115  |
| 255275    | MYADML2  | 5.196839146 | 6.938259829 | 2.5692E-153 | 2.3793E-151 |
| 8988      | HSPB3    | 5.132778641 | 5.396189658 | 3.5547E-129 | 2.3113E-127 |
| 7134      | TNNC1    | 5.1242242   | 10.68153075 | 2.0972E-172 | 3.0519E-170 |
| 201140    | DHRS7C   | 5.111189767 | 6.05320183  | 1.6943E-145 | 1.3919E-143 |
| 65009     | NDRG4    | 5.090554477 | 7.395688561 | 3.3229E-158 | 3.3403E-156 |
| 79933     | SYNPO2L  | 5.083313568 | 6.05349829  | 8.5512E-150 | 7.7315E-148 |
| 2845      | GPR22    | 5.075484195 | 6.21696475  | 1.1341E-149 | 1.0194E-147 |
| 3856      | KRT8     | 5.072100661 | 1.009755266 | 2.57041E-68 | 5.04183E-67 |
| 91608     | RASL10B  | 5.07002806  | 5.511366604 | 3.2702E-104 | 1.3289E-102 |
| 5213      | PFKM     | 5.062256262 | 9.545441731 | 6.1763E-173 | 9.3439E-171 |
| 6258      | RXRG     | 5.057862951 | 6.052362896 | 1.3988E-127 | 8.6187E-126 |
| 126393    | HSPB6    | 5.056840435 | 10.16736147 | 5.3551E-164 | 6.2462E-162 |
| 8470      | SORBS2   | 5.02604171  | 7.95202549  | 1.6103E-168 | 2.1031E-166 |
| 80167     | ABHD18   | 4.988320999 | 5.72285861  | 6.1335E-126 | 3.6467E-124 |
| 116969    | ART5     | 4.965557128 | 4.193611618 | 6.4544E-118 | 3.2874E-116 |
| 1339      | COX6A2   | 4.948330964 | 10.60075682 | 3.496E-131  | 2.3532E-129 |
| 84978     | FRMD5    | 4.940078561 | 5.602898918 | 2.4054E-111 | 1.0939E-109 |
| 5166      | PKM      | 4.935246209 | 7.857399289 | 5.3205E-147 | 4.4915E-145 |
| 7273      | TTN      | 4.928739825 | 10.72379382 | 1.0677E-191 | 2.2645E-189 |
| 51778     | MYO22    | 4.927534701 | 10.42136225 | 1.3365E-170 | 1.8233E-168 |
| 78989     | COLEC11  | 4.922506641 | 5.837208236 | 2.3695E-142 | 1.8379E-140 |
| 130827    | TMEM182  | 4.910650763 | 6.380822274 | 1.0004E-113 | 4.762E-112  |
| 165904    | XIRP1    | 4.910539484 | 7.652209005 | 7.9896E-146 | 6.6348E-144 |
| 1824      | DSC2     | 4.903101324 | 5.596178641 | 1.1899E-136 | 8.6996E-135 |
| 1133      | CHRM5    | 4.890718773 | 6.931665293 | 1.0253E-146 | 8.6081E-145 |
| 142686    | ASB14    | 4.86928843  | 7.658113548 | 4.533E-147  | 3.848E-145  |
| 401265    | KLHL31   | 4.868369525 | 5.603385307 | 4.896E-135  | 3.5456E-133 |
| 7060      | THBS4    | 4.858145689 | 3.951358662 | 9.20187E-98 | 3.30058E-96 |
| 5244      | ABCB4    | 4.855190948 | 5.689484339 | 3.7792E-118 | 1.9443E-116 |
| 57464     | STRIP2   | 4.837270073 | 5.464418003 | 5.3485E-118 | 2.7333E-116 |
| 10165     | SLC25A13 | 4.833224481 | 7.559753017 | 2.4713E-132 | 1.7243E-130 |
| 3762      | KCNJ5    | 4.822294494 | 6.304779717 | 1.4821E-119 | 7.8633E-118 |
| 285525    | YIPF7    | 4.815315464 | 7.46156037  | 2.2687E-134 | 1.6352E-132 |
| 221662    | RBM24    | 4.801777749 | 8.268787409 | 7.8971E-143 | 6.1881E-141 |
| 859       | CAV3     | 4.78820388  | 6.860363115 | 1.5199E-112 | 7.1021E-111 |
| 2805      | GOT1     | 4.777559203 | 10.03660872 | 9.5106E-137 | 6.9866E-135 |
| 79041     | TMEM38A  | 4.775320952 | 8.700579039 | 3.4152E-128 | 2.1387E-126 |
| 23281     | MTUS2    | 4.766330213 | 6.281757965 | 2.9344E-120 | 1.5677E-118 |
| 142689    | ASB12    | 4.716068626 | 6.252558225 | 7.47614E-91 | 2.34089E-89 |
| 203       | AK1      | 4.715108106 | 8.85525196  | 2.7032E-144 | 2.2088E-142 |
| 10231     | RCAN2    | 4.696054555 | 9.526338603 | 1.1652E-162 | 1.2901E-160 |
| 9572      | NR1D1    | 4.691202369 | 7.3742355   | 6.72115E-93 | 2.19913E-91 |
| 64091     | POPD2    | 4.655640043 | 4.222390378 | 1.107E-102  | 4.3934E-101 |
| 140458    | ASB5     | 4.649597297 | 5.39034558  | 4.7414E-127 | 2.9096E-125 |
| 84699     | CREB3L3  | 4.649070396 | 3.375218163 | 1.39253E-84 | 3.86872E-83 |
| 27063     | ANKRD1   | 4.642360348 | 9.007623127 | 1.2166E-149 | 1.0808E-147 |
| 8048      | CSRP3    | 4.621489014 | 10.5237103  | 1.1541E-167 | 1.4959E-165 |
| 5322      | PLA2G5   | 4.59633477  | 5.282926297 | 7.5643E-132 | 5.1599E-130 |
| 10891     | PPARGC1A | 4.58848184  | 5.46781577  | 2.8893E-105 | 1.1964E-103 |
| 9068      | ANGPTL1  | 4.584076887 | 2.467016328 | 8.75025E-87 | 5.26138E-85 |
| 622       | BDH1     | 4.581398323 | 5.336117653 | 1.2002E-120 | 6.4574E-119 |
| 38        | ACAT1    | 4.567082493 | 8.213734527 | 8.4093E-128 | 5.2022E-126 |
| 84331     | MCRIP2   | 4.566672281 | 8.983789937 | 4.9002E-151 | 4.4569E-149 |
| 163732    | CITED4   | 4.554290384 | 5.673205111 | 6.5619E-121 | 3.5429E-119 |
| 200539    | ANKRD23  | 4.54049291  | 7.118267406 | 4.3523E-118 | 2.2317E-116 |
| 27067     | STAU2    | 4.528349804 | 6.375354261 | 2.3578E-131 | 1.5941E-129 |
| 4653      | MYOC     | 4.522845393 | 3.274374796 | 3.84481E-89 | 1.17029E-87 |
| 50805     | IRX4     | 4.515950494 | 5.319865161 | 5.0301E-126 | 3.0024E-124 |
| 4624      | MYH6     | 4.49924453  | 11.14179739 | 7.4915E-172 | 1.0698E-169 |
| 10324     | KLHL41   | 4.499044712 | 5.686180594 | 1.9404E-108 | 8.4653E-107 |
| 57180     | ACTR3B   | 4.494570917 | 5.155500714 | 1.0381E-118 | 5.4136E-117 |
| 8557      | TCAP     | 4.489834539 | 10.75467625 | 2.1374E-169 | 2.8902E-167 |
| 127495    | LRRRC39  | 4.489048964 | 4.984181178 | 1.2244E-123 | 6.9811E-122 |
| 10486     | CAP2     | 4.48012658  | 7.618549669 | 1.5404E-99  | 5.79724E-98 |
| 6236      | RRAD     | 4.477472168 | 8.885193972 | 4.167E-130  | 2.7563E-128 |
| 488       | ATP2A2   | 4.470384556 | 10.05085254 | 2.9366E-163 | 3.2994E-161 |
| 5629      | PROX1    | 4.446734024 | 4.983948277 | 7.3956E-124 | 4.2234E-122 |
| 9200      | HACD1    | 4.440709202 | 6.174661852 | 2.3656E-118 | 1.2253E-116 |
| 6517      | SLC2A4   | 4.434636614 | 6.928970491 | 8.6373E-115 | 4.1898E-113 |
| 6442      | SGCA     | 4.426135118 | 4.2525246   | 1.9446E-108 | 8.4653E-107 |
| 5837      | PYGM     | 4.416657416 | 9.031379227 | 6.3866E-113 | 3.0119E-111 |
| 10991     | SLC38A3  | 4.395385753 | 5.165343753 | 9.4582E-126 | 5.6016E-124 |
| 3957      | LGALS2   | 4.392293133 | 0.562946641 | 2.09913E-49 | 2.70217E-48 |
| 65268     | WNK2     | 4.362098685 | 6.094454876 | 2.85798E-89 | 8.71654E-88 |
| 54715     | RBFOX1   | 4.35750215  | 5.917783126 | 3.3323E-111 | 1.5109E-109 |
| 81493     | SYNC     | 4.347118849 | 5.511437845 | 3.7693E-116 | 1.8639E-114 |
| 9499      | MYOT     | 4.3390724   | 3.854993515 | 3.44891E-91 | 1.08212E-89 |
| 6453      | ITSN1    | 4.321425572 | 3.484220449 | 6.74858E-43 | 4.76153E-42 |
| 84649     | DGAT2    | 4.293053499 | 7.411267116 | 3.4086E-114 | 1.6327E-112 |
| 6939      | TCF15    | 4.291744238 | 6.495544125 | 5.6171E-115 | 2.7422E-113 |
| 11346     | SYNPO    | 4.288154665 | 5.982015227 | 3.34101E-64 | 6.04149E-63 |
| 254552    | NUDT8    | 4.281873696 | 7.129148923 | 6.29511E-77 | 1.51718E-75 |
| 253738    | EBF3     | 4.281813647 | 4.252002636 | 9.2714E-107 | 3.9352E-105 |
| 23261     | CAMTA1   | 4.278963758 | 5.562167007 | 1.6703E-99  | 6.27063E-98 |
| 4151      | MB       | 4.258895557 | 4.831987079 | 8.64897E-91 | 2.70258E-89 |
| 441549    | CDNF     | 4.242714384 | 8.846614523 | 3.8955E-124 | 2.2377E-122 |
| 116135    | LRRRC3B  | 4.24269519  | 3.99241576  | 3.84078E-92 | 1.23552E-90 |
| 338322    | NLRP10   | 4.242625164 | 2.421632189 | 1.88714E-75 | 4.6436E-74  |
| 57057     | TBX20    | 4.223585095 | 2.517579609 | 1.15893E-78 | 2.89354E-77 |
| 645191    | LINGO3   | 4.205247285 | 4.048637765 | 2.95998E-90 | 9.19277E-89 |
| 1737      | DLAT     | 4.201702593 | 7.102508867 | 1.0455E-116 | 5.2037E-115 |
| 7352      | UCP3     | 4.193575714 | 3.563633951 | 4.28065E-76 | 1.06068E-74 |
| 2110      | ETFDH    | 4.177000824 | 9.82049367  | 6.9983E-100 | 2.26606E-98 |
| 1674      | DES      | 4.170103879 | 8.962916807 | 4.7098E-134 | 3.3629E-132 |
| 79135     | APOO     | 4.159380756 | 6.333804785 | 4.16759E-98 | 1.51621E-96 |

## Downregulated genes in TBI kidney compared with Sham group

| Entrez ID | SYMBOL    | logFC       | logCPM      | P-Value     | FDR          |
|-----------|-----------|-------------|-------------|-------------|--------------|
| 55897     | MESP1     | -5.58528614 | 1.774705689 | 7.176E-86   | 2.0457E-84   |
| 138162    | C9orf116  | -5.56975099 | 5.465942883 | 1.3358E-141 | 1.0155E-139  |
| 89876     | CFAP91    | -5.56314451 | 3.988255481 | 1.2113E-101 | 4.7095E-100  |
| 27283     | TINAG     | -5.5655563  | 4.769036667 | 1.1646E-164 | 1.3689E-162  |
| 9227      | LRAT      | -5.54640093 | 4.621708983 | 1.2638E-143 | 1.0164E-141  |
| 339145    | CIBAR2    | -5.53088224 | 3.18226492  | 1.89685E-78 | 4.70516E-77  |
| 283385    | MORN3     | -5.5151398  | 2.494954617 | 5.5182E-86  | 1.58791E-84  |
| 55859     | BEX1      | -5.49882595 | 4.180010075 | 2.4067E-142 | 1.8573E-140  |
| 8309      | ACOX2     | -5.46975769 | 4.790422119 | 2.1969E-154 | 2.0722E-152  |
| 56301     | SLC7A10   | -5.43970718 | 4.532191733 | 4.744E-119  | 2.4996E-117  |
| 5603      | MAPK13    | -5.43927158 | 4.220486159 | 4.1055E-143 | 3.2844E-141  |
| 54866     | PPP1R14D  | -5.43124694 | 4.01516842  | 1.2023E-101 | 4.6865E-100  |
| 3240      | HP        | -5.42780803 | 8.424657068 | 9.9925E-163 | 1.1145E-160  |
| 79098     | C1orf116  | -5.42305753 | 5.520748468 | 3.2084E-148 | 2.7855E-146  |
| 114827    | FHAD1     | -5.41694861 | 3.002102949 | 4.5292E-109 | 2.0002E-107  |
| 57835     | SLC4A5    | -5.40825337 | 3.116286725 | 9.2549E-108 | 4.0061E-106  |
| 8785      | MATN4     | -5.3901285  | 5.944689852 | 8.3253E-148 | 7.1467E-146  |
| 83659     | TEKT1     | -5.36723158 | 5.649233177 | 1.0573E-128 | 6.7039E-127  |
| 27159     | CHIA      | -5.35577572 | 5.586066682 | 1.0378E-108 | 4.5568E-107  |
| 254050    | LRRRC43   | -5.33838253 | 1.338051058 | 1.15862E-73 | 2.56948E-72  |
| 341676    | NEK5      | -5.33721687 | 3.276889956 | 4.21743E-86 | 1.21819E-84  |
| 23767     | FLRT3     | -5.33714516 | 4.826377529 | 3.7666E-159 | 3.8887E-157  |
| 4585      | MUC4      | -5.32242735 | 3.358461146 | 2.6862E-114 | 1.2948E-112  |
| 64388     | GREM2     | -5.30126243 | 6.093971258 | 2.0802E-139 | 1.5658E-137  |
| 282966    | C10orf53  | -5.2938608  | 3.753070202 | 1.6837E-122 | 9.3212E-121  |
| 5593      | PRKG2     | -5.23609741 | 4.391798149 | 3.3794E-135 | 2.4589E-133  |
| 58495     | OVOL2     | -5.22552114 | 2.602766182 | 1.0899E-99  | 4.12211E-98  |
| 57402     | S100A14   | -5.20265673 | 5.386199541 | 1.44545E-58 | 2.29827E-57  |
| 346389    | MACC1     | -5.1711298  | 4.209215153 | 4.7635E-116 | 2.3479E-114  |
| 57221     | ARFGF3    | -5.13875866 | 3.90678603  | 3.1169E-112 | 1.44776E-110 |
| 140803    | TRPM6     | -5.13469616 | 6.754552434 | 1.4686E-113 | 6.9688E-112  |
| 1768      | DNAH6     | -5.12727402 | 5.498163346 | 5.1656E-114 | 2.4666E-112  |
| 158067    | AK8       | -5.07131323 | 3.909541867 | 1.9049E-103 | 7.6596E-102  |
| 8833      | GMPS      | -5.06664618 | 6.885244616 | 7.2893E-131 | 4.8851E-129  |
| 196385    | DNAH10    | -5.06632942 | 3.085524835 | 5.8355E-103 | 2.3221E-101  |
| 131       | ADH7      | -5.05515713 | 5.872780594 | 3.3132E-128 | 2.0833E-126  |
| 140862    | ISM1      | -5.05355851 | 6.858796313 | 1.2139E-155 | 1.174E-153   |
| 100130933 | SMIM6     | -5.03027746 | 5.184842477 | 4.8029E-130 | 3.1633E-128  |
| 55289     | ACOXL     | -5.0021138  | 4.863028571 | 1.4644E-122 | 8.1367E-121  |
| 4050      | LTB       | -5.00112819 | 5.74294438  | 8.8712E-106 | 3.7036E-104  |
| 2596      | GAP43     | -4.99812747 | 5.234246728 | 1.61E-125   | 9.462E-124   |
| 26471     | NUPR1     | -4.99560847 | 8.727638031 | 6.8735E-132 | 4.7098E-130  |
| 23639     | DNAAF11   | -4.99101669 | 0.903267926 | 8.75346E-56 | 1.31259E-54  |
| 398       | ARHGDIG   | -4.98533    | 4.053623983 | 9.2544E-119 | 4.8427E-117  |
| 83902     | KRTAP17-1 | -4.9822806  | 2.833592214 | 2.32192E-93 | 7.72961E-92  |
| 89765     | RSPH1     | -4.96949188 | 6.575820183 | 4.6413E-132 | 3.209E-130   |
| 94120     | SYTL3     | -4.96505198 | 2.754839121 | 4.18212E-88 | 1.25037E-86  |
| 51316     | PLAC8     | -4.95071175 | 4.517764005 | 3.98923E-98 | 1.54578E-96  |
| 4258      | MGST2     | -4.95051911 | 6.754694904 | 3.12E-132   | 2.167E-130   |
| 9388      | LIPG      | -4.95030163 | 4.507032637 | 1.81044E-73 | 3.98037E-72  |
| 23682     | RAB38     | -4.94381305 | 3.522120363 | 3.3078E-110 | 1.8466E-108  |
| 114       | ADCY8     | -4.93191343 | 5.27306594  | 8.676E-143  | 7.63767E-141 |
| 108       | ADCY2     | -4.92774235 | 4.230406632 | 1.4472E-126 | 8.7754E-125  |
| 92565     | FANK1     | -4.92641492 | 3.019817834 | 4.9999E-97  | 1.72759E-95  |
| 349633    | PLET1     | -4.92325204 | 5.413036578 | 1.0995E-125 | 6.4866E-124  |
| 3815      | KIT       | -4.91602665 | 7.064449088 | 3.131E-123  | 1.7525E-121  |
| 147808    | ZNF784    | -4.9128571  | 4.7448921   | 1.8618E-122 | 1.027E-120   |
| 3772      | KCNJ15    | -4.90908673 | 5.148014239 | 3.2248E-139 | 2.4037E-137  |
| 11187     | PKP3      | -4.9068738  | 3.485029599 | 2.9655E-128 | 1.8668E-126  |
| 162515    | SLC16A11  | -4.90498718 | 7.159369118 | 3.6627E-142 | 2.8123E-140  |
| 133150    | SULT1D1P  | -4.89920948 | 2.857573454 | 9.1869E-84  | 2.49255E-82  |
| 9723      | SEMA3E    | -4.89234242 | 4.043466986 | 6.91935E-98 | 2.9358E-96   |
| 374       | AREG      | -4.8802355  | 4.268794279 | 9.51682E-84 | 2.59673E-82  |
| 116285    | ACSM1     | -4.88013265 | 3.94242201  | 1.4709E-111 | 6.7291E-110  |
| 85442     | KNDC1     | -4.87889937 | 4.703130034 | 4.1997E-129 | 2.7192E-127  |
| 159686    | CFAP58    | -4.87674885 | 2.115936082 | 3.3681E-73  | 7.72035E-72  |
| 285141    | RCH2      | -4.87647424 | 5.155808533 | 1.5292E-126 | 9.2358E-125  |
| 7225      | TRPC6     | -4.87336226 | 4.837569424 | 2.76905E-98 | 1.01709E-96  |
| 79983     | POF1B     | -4.8604756  | 3.650418277 | 1.51958E-92 | 1.36998E-90  |
| 3485      | IGFBP2    | -4.8441556  | 5.165814174 | 4.1026E-139 | 3.0431E-137  |
| 4036      | LRP2      | -4.82118129 | 5.427337327 | 4.9106E-133 | 3.4738E-131  |
| 93166     | PRDM6     | -4.81463013 | 3.495176946 | 8.93872E-69 | 1.78075E-67  |
| 146754    | DNAH2     | -4.80508363 | 2.902396761 | 9.5045E-97  | 1.81725E-95  |
| 8809      | IL18R1    | -4.79310245 | 5.167415014 | 5.015E-98   | 1.81575E-96  |
| 23657     | SLC7A11   | -4.7920911  | 5.90803942  | 7.3458E-105 | 3.0254E-103  |
| 10053     | AP1M2     | -4.78861762 | 4.856634475 | 2.5701E-124 | 1.4932E-122  |
| 92745     | SLC38A5   | -4.77789842 | 5.603243748 | 3.9095E-106 | 1.6411E-104  |
| 5652      | PRSS8     | -4.77581099 | 5.624924256 | 2.5482E-117 | 1.285E-115   |
| 54102     | CLIC6     | -4.77404955 | 5.677077549 | 1.9836E-123 | 1.1143E-121  |
| 15702     | CYP2F1    | -4.77144407 | 9.823454648 | 2.1519E-176 | 2.057E-174   |
| 126695    | KDF1      | -4.76088753 | 4.200824872 | 1.50476E-68 | 2.97448E-67  |
| 151827    | LRRRC34   | -4.72459716 | 3.262754155 | 2.27012E-86 | 6.58205E-85  |
| 222967    | RSPH10B   | -4.71786229 | 4.6023104   | 6.98373E-71 | 1.44792E-69  |
| 51090     | PLLP      | -4.70704259 | 4.688229528 | 1.4751E-121 | 8.0498E-120  |
| 158248    | TTC16     | -4.70665547 | 6.351341539 | 1.0333E-107 | 4.4599E-106  |
| 64446     | DNAI2     | -4.69714247 | 3.804285791 | 1.7736E-89  | 3.9036E-88   |
| 101923935 | CFAP97D2  | -4.69290727 | 2.575531572 | 2.08874E-86 | 6.06767E-85  |
| 2568      | GABRP     | -4.69129705 | 6.706943414 | 2.91050E-46 | 3.90965E-45  |
| 3248      | HPGD      | -4.68782947 | 7.444869309 | 4.2081E-126 | 2.5216E-124  |
| 216       | ALDH1A1   | -4.66692888 | 9.253610455 | 1.0382E-157 | 1.0301E-155  |
| 255119    | CFAP299   | -4.64452802 | 6.28489926  | 1.26273E-75 | 2.91899E-74  |
| 174       | AFP       | -4.63953156 | 2.10984067  | 1.67572E-78 | 6.6432E-77   |
| 1235      | CCR6      | -4.62986873 | 1.955209347 | 2.73654E-76 | 4.17482E-75  |
| 2001      | ELF5      | -4.62943757 | 4.040965704 | 5.93947E-94 | 1.82328E-92  |
| 8701      | DNAH11    | -4.62485994 | 2.871010932 | 1.25523E-72 | 2.6796E-71   |
| 79170     | PRH15L    | -4.61715825 | 6.702316498 | 1.1617E-119 | 3.2354E-117  |

Supplementary table 1

## Upregulated genes in TBI kidney compared with Sham group

| Entrez ID | SYMBOL    | logFC       | logCPM      | P-Value     | FDR         |
|-----------|-----------|-------------|-------------|-------------|-------------|
| 2318      | FLNC      | 4.150329329 | 7.631654142 | 2.13641E-93 | 7.12757E-92 |
| 55260     | TMEM143   | 4.149296817 | 6.32542942  | 7.25286E-70 | 1.47372E-68 |
| 3418      | IDH2      | 4.146286963 | 10.25142008 | 9.9637E-144 | 8.0982E-142 |
| 80852     | GRIP2     | 4.137703512 | 4.140297928 | 1.77379E-93 | 5.94374E-92 |
| 51666     | ASB4      | 4.130815421 | 7.35019246  | 2.08483E-93 | 6.97072E-92 |
| 94030     | LRRC4B    | 4.125525656 | 4.655259898 | 3.1631E-102 | 1.2425E-100 |
| 79154     | DHRS11    | 4.124787338 | 7.236026467 | 1.3256E-104 | 5.4303E-103 |
| 10611     | PDLIM5    | 4.115139231 | 5.406188891 | 6.4266E-112 | 2.9667E-110 |
| 255798    | SMCO1     | 4.088658522 | 4.22949314  | 9.8485E-89  | 2.9799E-87  |
| 91624     | NEXN      | 4.072505715 | 8.736324078 | 7.6712E-105 | 3.151E-103  |
| 253017    | TECLRL    | 4.05834864  | 3.795324067 | 3.96071E-80 | 1.02576E-78 |
| 400258    | C14orf180 | 4.052298923 | 2.589053394 | 2.00665E-59 | 3.24461E-58 |
| 729359    | PLIN4     | 4.048802571 | 8.732144201 | 4.8937E-129 | 3.1418E-127 |
| 57017     | COQ9      | 4.038002562 | 8.349923498 | 4.69746E-93 | 1.54692E-91 |
| 1211      | CLTA      | 4.031058306 | 3.448002421 | 2.1955E-55  | 5.5800E-55  |
| 1891      | ECH1      | 4.022564111 | 10.15448112 | 3.9276E-128 | 2.4495E-126 |
| 7137      | TNNI3     | 4.019620202 | 10.8794452  | 3.7742E-115 | 1.8543E-113 |
| 57167     | SALL4     | 4.016695038 | 1.300374153 | 1.9184E-52  | 2.66242E-51 |
| 166348    | KBTBD12   | 4.014176222 | 1.154601243 | 2.47641E-47 | 3.04667E-46 |
| 84814     | PLPP7     | 4.012466124 | 4.55841854  | 5.58808E-92 | 1.78631E-90 |
| 154150    | HDGFL1    | 4.0104902   | 0.111675838 | 4.00384E-43 | 4.46233E-42 |
| 8087      | FXR1      | 4.006881828 | 3.865465427 | 5.8922E-82  | 1.56579E-80 |
| 134111    | UBE2QL1   | 3.995193219 | 3.949062698 | 6.73702E-82 | 1.78718E-80 |
| 7384      | UQCRC1    | 3.993325484 | 9.1929286   | 1.0438E-114 | 5.0471E-113 |
| 93058     | COQ10A    | 3.991458523 | 8.046790402 | 9.28862E-96 | 3.23303E-94 |
| 7423      | VEGFB     | 3.978560201 | 8.840046388 | 1.5051E-108 | 6.5897E-107 |
| 23632     | CA14      | 3.974288807 | 8.325689238 | 7.7415E-110 | 3.4487E-108 |
| 55527     | FEM1A     | 3.950456297 | 7.763906786 | 7.038E-99   | 2.59761E-97 |
| 6330      | SCN4B     | 3.950389383 | 4.035527949 | 9.72364E-86 | 2.76166E-84 |
| 94233     | OPN4      | 3.948487144 | 2.909038645 | 5.2045E-70  | 1.06175E-68 |
| 127281    | PRXL2B    | 3.943460431 | 7.508553565 | 1.14691E-72 | 2.46829E-71 |
| 171425    | CLYL8     | 3.937712386 | 6.645781449 | 3.42143E-79 | 8.68429E-78 |
| 80755     | AARS01    | 3.934619446 | 7.295829021 | 8.06171E-94 | 2.71927E-92 |
| 22849     | CPEB3     | 3.928453131 | 7.913667852 | 4.53396E-95 | 1.18599E-93 |
| 7139      | TNNT2     | 3.927477137 | 11.06700297 | 7.5112E-122 | 4.1136E-120 |
| 10105     | PPIF      | 3.927275559 | 6.317900475 | 3.53535E-94 | 1.19778E-92 |
| 5264      | PHYH      | 3.926431987 | 8.911101954 | 3.25156E-92 | 1.04818E-90 |
| 8431      | NR0B2     | 3.910290416 | 3.18109238  | 1.87519E-76 | 4.70033E-75 |
| 4878      | NPPA      | 3.903131684 | 11.03447018 | 1.5543E-133 | 1.1047E-131 |
| 158471    | PRUNE2    | 3.901251939 | 0.795541376 | 1.84511E-42 | 2.01813E-41 |
| 5164      | PDK2      | 3.881447583 | 9.951634108 | 1.1797E-89  | 3.6124E-88  |
| 56997     | COQ8A     | 3.878715112 | 3.596510382 | 1.03042E-83 | 2.80656E-82 |
| 60401     | EDA2R     | 3.868950469 | 11.05912147 | 2.774E-121  | 1.5031E-119 |
| 2104      | ESRRG     | 3.86784044  | 5.514062107 | 5.42225E-90 | 1.67378E-88 |
| 419       | ART3      | 3.865783499 | 8.779499028 | 4.035E-119  | 2.1334E-117 |
| 72731     | NMRK2     | 3.864500482 | 2.4331983   | 1.09902E-66 | 2.10703E-65 |
| 1413      | CRYBA4    | 3.863823353 | 2.843189445 | 2.49813E-76 | 5.92724E-75 |
| 516       | ATP5MC1   | 3.860417049 | 4.440717445 | 1.46473E-64 | 2.62796E-63 |
| 9099      | USP2      | 3.856821633 | 6.212037622 | 1.93328E-92 | 6.27187E-91 |
| 287       | ANK2      | 3.853676775 | 4.334830951 | 6.87786E-68 | 1.33877E-66 |
| 5523      | PPP2R3A   | 3.845023696 | 7.841963455 | 1.7065E-95  | 5.91278E-94 |
| 23363     | OBSL1     | 3.840798113 | 6.122138516 | 1.62431E-86 | 4.73654E-85 |
| 3419      | IDH3A     | 3.839584983 | 9.280034531 | 5.529E-99   | 2.04558E-97 |
| 27124     | INPP5J    | 3.827813383 | 5.77218058  | 4.64352E-89 | 1.4106E-87  |
| 26251     | KCNG2     | 3.827709746 | 4.452536527 | 1.75793E-91 | 5.53873E-90 |
| 5913      | RAPSN     | 3.825469665 | 4.825858314 | 2.3798E-102 | 9.3721E-101 |
| 84288     | EFCAB2    | 3.821714701 | 9.151565345 | 1.65335E-94 | 5.62654E-93 |
| 400120    | SERTM1    | 3.815168957 | 0.722009249 | 1.61811E-44 | 1.84238E-43 |
| 169522    | KCNV2     | 3.801711022 | 4.329109059 | 4.22353E-88 | 1.258E-86   |
| 140625    | ACTR2     | 3.79730023  | 2.508371745 | 7.21366E-34 | 3.63034E-33 |
| 125113    | KRT222    | 3.796555183 | 3.991868541 | 5.5868E-86  | 1.60463E-84 |
| 137814    | NKX2-6    | 3.793064471 | 3.724701643 | 2.73314E-20 | 1.50387E-19 |
| 121601    | ANO4      | 3.783575231 | 2.086202908 | 6.13969E-54 | 8.7677E-53  |
| 7079      | TIMP4     | 3.778867214 | 3.929279861 | 6.20664E-84 | 1.72055E-82 |
| 55544     | RBM38     | 3.772515185 | 6.344653376 | 1.01526E-75 | 2.35762E-74 |
| 7425      | VGF       | 3.763055677 | 4.738539681 | 3.09588E-26 | 2.13664E-25 |
| 9796      | PHYHIP    | 3.750112677 | 2.747325635 | 2.932E-50   | 3.8555E-49  |
| 11173     | ADAMTS7   | 3.749581539 | 4.460415378 | 2.7779E-88  | 8.3228E-87  |
| 1376      | CPT2      | 3.748812591 | 9.379949151 | 1.6982E-126 | 1.0216E-124 |
| 1837      | DTNA      | 3.747467867 | 6.14419252  | 6.54938E-65 | 1.20427E-63 |
| 55321     | TMEM74B   | 3.747174013 | 2.253252694 | 5.00483E-67 | 9.6431E-66  |
| 9927      | MFN2      | 3.738892162 | 10.48459082 | 2.8966E-130 | 1.9328E-128 |
| 3768      | KCNJ12    | 3.737872172 | 4.472090965 | 1.11161E-90 | 3.46642E-89 |
| 84816     | RTN4IP1   | 3.737042845 | 5.690717998 | 1.52046E-79 | 3.89809E-78 |
| 775       | CACNA1C   | 3.728072918 | 7.052120842 | 1.72767E-83 | 4.68895E-82 |
| 55314     | TMEM144   | 3.725727851 | 3.368657777 | 4.67188E-75 | 1.06547E-73 |
| 2180      | ACSL1     | 3.721768776 | 8.489350436 | 6.23057E-86 | 1.78283E-84 |
| 54714     | CNGB3     | 3.720305337 | 2.545942891 | 1.07258E-60 | 1.78919E-59 |
| 11145     | PLAAT3    | 3.717558141 | 4.550214244 | 7.83861E-79 | 1.73712E-77 |
| 33        | ACADL     | 3.710971268 | 10.00596038 | 3.8043E-124 | 2.1936E-122 |
| 5019      | OXCT1     | 3.70217918  | 10.42309571 | 1.4758E-123 | 8.3832E-122 |
| 28977     | MRPL42    | 3.701730096 | 9.704993463 | 5.6721E-106 | 2.3745E-104 |
| 4708      | NDUFB2    | 3.700247016 | 9.2073907   | 3.7049E-110 | 1.6602E-108 |
| 2817      | GUCP1     | 3.696365112 | 9.791064744 | 6.18211E-92 | 1.92708E-90 |
| 205       | AK4       | 3.687631657 | 6.150640553 | 1.15379E-92 | 3.75906E-91 |
| 37        | ACADVL    | 3.687429847 | 10.26578531 | 7.7118E-127 | 4.6947E-125 |
| 57646     | USP28     | 3.685034077 | 5.52129949  | 4.47201E-69 | 8.95575E-68 |
| 4606      | MYBPC2    | 3.681676484 | 3.312387644 | 2.02464E-71 | 4.25536E-70 |
| 84675     | TRIM55    | 3.680864143 | 1.895224711 | 5.64825E-41 | 5.97268E-40 |
| 2254      | FGF9      | 3.675168472 | 2.369008484 | 3.78992E-54 | 5.44778E-53 |
| 4731      | NDUFV3    | 3.662066528 | 8.886095863 | 2.84447E-84 | 7.84539E-83 |
| 388228    | SBK1      | 3.659747514 | 6.146217281 | 8.14527E-85 | 2.28337E-83 |
| 1666      | DECR1     | 3.654875934 | 8.077187857 | 9.2516E-100 | 3.50781E-98 |
| 55129     | ANO10     | 3.652600325 | 6.218568949 | 0.000167125 | 0.000327855 |
| 3099      | HK2       | 3.648744004 | 9.49905437  | 9.5951E-125 | 5.5959E-123 |
| 57447     | NDRG2     | 3.64253076  | 11.37634767 | 2.0893E-106 | 8.8188E-105 |

## Downregulated genes in TBI kidney compared with Sham group

| Entrez ID | SYMBOL   | logFC        | logCPM      | P-Value     | FDR         |
|-----------|----------|--------------|-------------|-------------|-------------|
| 1543      | CYP11A1  | -4.61621217  | 3.470416129 | 4.59488E-95 | 1.57421E-93 |
| 54855     | TENT5C   | -4.61602784  | 1.59093299  | 7.7768E-57  | 1.34919E-55 |
| 220136    | CFAP53   | -4.60641085  | 3.484280847 | 2.62142E-95 | 9.04183E-94 |
| 25790     | CFAP45   | -4.60166041  | 5.216636226 | 4.8144E-132 | 3.3137E-130 |
| 245973    | ATP6V1C2 | -4.59924735  | 0.422432902 | 1.62735E-46 | 1.95487E-45 |
| 8516      | ITGA8    | -4.59773835  | 6.652387667 | 2.9725E-124 | 1.7205E-122 |
| 1767      | DNAH5    | -4.59720617  | 4.194133103 | 3.3227E-100 | 1.27245E-98 |
| 84666     | RETNLB   | -4.59138376  | 8.373460356 | 2.8779E-134 | 2.0645E-132 |
| 3880      | KRT19    | -4.58149281  | 7.059518099 | 3.1108E-114 | 1.4947E-112 |
| 5319      | PLA2G1B  | -4.57844434  | 3.855300243 | 2.9066E-99  | 1.08589E-97 |
| 91862     | MARVELD3 | -4.57392524  | 3.560083137 | 8.75E-102   | 3.149E-100  |
| 6495      | SIX1     | -4.57237054  | 2.21824441  | 5.42801E-75 | 1.23606E-73 |
| 10233     | LRRC23   | -4.56197334  | 6.833167067 | 1.6101E-117 | 8.1734E-116 |
| 8685      | MARCO    | -4.54343926  | 2.976655648 | 5.97521E-86 | 1.71297E-84 |
| 55800     | SCN3B    | -4.54260273  | 3.377363415 | 3.42091E-84 | 9.4183E-83  |
| 3067      | HDC      | -4.54096083  | 6.51466491  | 1.6426E-129 | 1.0726E-127 |
| 388633    | LDLRAD1  | -4.53428362  | 2.906373485 | 1.06876E-84 | 2.98549E-83 |
| 90557     | CCDC74A  | -4.52754955  | 2.005808905 | 8.907E-74   | 1.97818E-72 |
| 79961     | DENND2D  | -4.52146113  | 3.524062112 | 3.4845E-99  | 1.29863E-97 |
| 10505     | SEMA4F   | -4.51745584  | 3.384291577 | 1.06277E-93 | 3.57691E-92 |
| 6713      | SQLE     | -4.51161003  | 4.915921547 | 7.1234E-127 | 4.3538E-125 |
| 224       | ALDH3A2  | -4.51076832  | 6.439665176 | 4.206E-115  | 2.0599E-113 |
| 55332     | DRAM1    | -4.50821924  | 8.008430338 | 4.4166E-129 | 2.8475E-127 |
| 23705     | CADM1    | -4.49058713  | 6.061231354 | 2.384E-117  | 1.2062E-115 |
| 51208     | CLDN18   | -4.490472    | 8.133618895 | 6.1962E-143 | 4.8803E-141 |
| 2886      | GRB7     | -4.49034891  | 5.697549987 | 1.9255E-120 | 1.0323E-118 |
| 1030      | CDKN2B   | -4.48462197  | 4.960239164 | 1.9005E-107 | 8.1801E-106 |
| 107126360 | AOX3P    | -4.45775811  | 7.064427    | 7.3183E-122 | 4.0224E-120 |
| 1999      | ELF3     | -4.45704543  | 4.214586767 | 9.16669E-98 | 3.2957E-96  |
| 115019    | SLC26A9  | -4.44908211  | 3.072404232 | 3.84203E-66 | 6.61759E-65 |
| 54566     | EPB41L4B | -4.44155563  | 5.042282428 | 5.8761E-108 | 2.5508E-106 |
| 133418    | EMB      | -4.42585409  | 7.067205528 | 1.1316E-112 | 5.3041E-111 |
| 4233      | MET      | -4.42151689  | 5.097318785 | 2.8697E-112 | 1.3369E-110 |
| 2155      | F7       | -4.41914144  | 2.785035968 | 1.46323E-78 | 3.6414E-77  |
| 23242     | COBL     | -4.41101933  | 5.033127832 | 1.8128E-123 | 1.0259E-121 |
| 319089    | TTC6     | -4.40967164  | 1.119595259 | 8.27776E-51 | 1.09795E-49 |
| 9595      | CYTIP    | -4.39972357  | 2.808445678 | 2.1093E-67  | 4.07976E-66 |
| 56300     | IL36G    | -4.39954693  | 1.578055964 | 2.27483E-57 | 3.55051E-56 |
| 57211     | ADGRG6   | -4.39876897  | 4.425635828 | 5.329E-111  | 2.4091E-109 |
| 196996    | GRAMD2A  | -4.39515601  | 1.738656735 | 1.40102E-57 | 2.19564E-56 |
| 3909      | LAMA3    | -4.39508753  | 5.3157695   | 1.2511E-103 | 5.044E-102  |
| 1285      | COL4A3   | -4.38769337  | 4.889925679 | 1.9295E-123 | 1.0879E-121 |
| 79645     | EFCAB1   | -4.37245478  | 3.505707972 | 2.67788E-74 | 6.00853E-73 |
| 55117     | SLC6A15  | -4.37120656  | 3.440511975 | 5.96517E-71 | 1.23842E-69 |
| 3001      | GZMA     | -4.37095052  | 3.740947262 | 6.1297E-100 | 2.3357E-98  |
| 5792      | PTPRF    | -4.36837653  | 7.56184217  | 4.3998E-103 | 1.7553E-101 |
| 92749     | DRC1     | -4.36594156  | 4.010978237 | 3.9144E-103 | 1.5657E-101 |
| 1036      | CDO1     | -4.36145418  | 6.868671362 | 4.83042E-94 | 1.68899E-94 |
| 3674      | ITGA2B   | -4.360717635 | 3.228986125 | 9.55228E-70 | 1.93579E-68 |
| 3170      | FOXA2    | -4.35551698  | 3.813763019 | 1.23453E-92 | 4.01353E-91 |
| 651       | BMP3     | -4.35182189  | 3.572430138 | 1.15437E-84 | 3.21876E-83 |
| 64084     | CLSTN2   | -4.34159947  | 3.718413602 | 3.43731E-98 | 1.25651E-96 |
| 5444      | PON1     | -4.30797411  | 5.976355584 | 1.0703E-106 | 4.5302E-105 |
| 158326    | FREM1    | -4.30318423  | 1.777247915 | 1.27444E-51 | 1.72637E-50 |
| 6280      | S100A9   | -4.29885604  | 6.540145409 | 1.9839E-107 | 8.5151E-106 |
| 55531     | ELMOD1   | -4.29354124  | 2.228545663 | 1.68222E-60 | 2.79394E-59 |
| 33310     | SFN      | -4.28463147  | 6.63432735  | 7.2422E-132 | 3.2821E-132 |
| 256691    | MAMDC2   | -4.28260099  | 5.884854672 | 6.7362E-115 | 3.278E-113  |
| 101       | ADAM8    | -4.27254576  | 6.050744831 | 7.2317E-113 | 3.4E-111    |
| 285800    | PRR18    | -4.26851876  | 3.813290717 | 1.11412E-92 | 3.63754E-91 |
| 26085     | CLK13    | -4.26634689  | 1.860729347 | 7.82216E-57 | 1.20486E-55 |
| 440836    | ODF3B    | -4.2599133   | 5.502822366 | 4.0521E-104 | 1.6423E-102 |
| 158798    | AKAP14   | -4.25782563  | 1.735573149 | 6.61299E-63 | 1.17087E-61 |
| 6530      | SLC6A2   | -4.25419985  | 6.186069354 | 1.7014E-111 | 7.7603E-110 |
| 3824      | KLRD1    | -4.2486687   | 3.196840634 | 2.38821E-68 | 4.69046E-67 |
| 221       | ALDH3B1  | -4.23343733  | 4.19459373  | 5.13334E-96 | 1.79081E-94 |
| 10047     | CS78     | -4.23057169  | 2.474538633 | 1.72144E-73 | 7.37561E-72 |
| 79993     | ELOVL7   | -4.22834231  | 1.665981132 | 5.6003E-44  | 6.33402E-43 |
| 3855      | KRT7     | -4.22277445  | 8.165981226 | 1.414E-118  | 7.3487E-117 |
| 85455     | DISP2    | -4.21739365  | 3.65907112  | 3.38704E-73 | 7.404E-72   |
| 84073     | MYCBPAP  | -4.21457494  | 3.429788416 | 9.47674E-86 | 2.69655E-84 |
| 51473     | D4C4C2   | -4.21012047  | 1.521808536 | 4.75257E-55 | 6.94921E-54 |
| 2583      | BAGALNT1 | -4.19042629  | 5.153597947 | 4.6228E-107 | 1.9731E-105 |
| 6364      | CCL20    | -4.1836378   | 4.124298495 | 1.22492E-46 | 1.47533E-45 |
| 5284      | PIGR     | -4.18323215  | 2.485246916 | 1.74856E-84 | 4.84021E-83 |
| 55300     | PI4K2B   | -4.17915458  | 5.498450053 | 4.57555E-86 | 1.31914E-84 |
| 79136     | LY6G6E   | -4.17907168  | 2.122730304 | 2.55531E-58 | 4.05452E-57 |
| 23620     | NTR2R    | -4.17896648  | 1.521178366 | 1.7586E-102 | 6.9617E-101 |
| 57111     | RAB25    | -4.1778921   | 5.895392805 | 1.6781E-109 | 7.4538E-108 |
| 94        | ACVRL1   | -4.17026618  | 9.230464699 | 1.5652E-129 | 1.0265E-127 |
| 2813      | GP2      | -4.16670238  | 1.823761    | 8.92788E-59 | 1.42846E-57 |
| 79370     | BCL2L14  | -4.16275631  | 5.23295446  | 9.00092E-73 | 1.94257E-71 |
| 79888     | LPAT1    | -4.15309141  | 3.282877586 | 1.15299E-76 | 7.26174E-75 |
| 4602      | MYB      | -4.14189988  | 1.999310118 | 5.99962E-68 | 1.16931E-66 |
| 56475     | RPRM     | -4.13575576  | 4.219089172 | 2.40873E-96 | 8.461E-95   |
| 79953     | SYNDIG1  | -4.12064515  | 6.010531414 | 3.0342E-105 | 1.253E-103  |
| 218       | ALDH3A1  | -4.11777665  | 6.800075137 | 3.8429E-100 | 1.468E-98   |
| 255743    | NPNT     | -4.11380489  | 2.643114072 | 2.35566E-61 | 4.02606E-60 |
| 91860     | CALML4   | -4.1054051   | 2.298074552 | 1.11779E-69 | 2.26224E-68 |
| 4610      | MYCL     | -4.09111028  | 3.738343069 | 4.3509E-59  | 7.00545E-58 |
| 9576      | SPAGE    | -4.06751901  | 3.828847888 | 1.38755E-88 | 4.1818E-87  |
| 6689      | SPIB     | -4.06722514  | 3.197175302 | 2.30034E-82 | 6.16654E-81 |
| 915       | CD3D     | -4.05965249  | 4.02352345  | 3.00313E-73 | 6.63966E-72 |
| 1305      | COL13A1  | -4.05775751  | 3.664167185 | 1.34108E-76 | 3.20684E-75 |
| 257177    | CFAP126  | -4.05692515  | 6.747945698 | 1.3751E-104 | 5.6181E-103 |
| 254956    | MORN5    | -4.05673504  | 3.120835137 | 2.06178E-77 | 5.00859E-76 |

Supplementary table 1

## Upregulated genes in TBI kidney compared with Sham group

| Entrez ID | SYMBOL   | logFC       | logCPM      | P-Value      | FDR         |
|-----------|----------|-------------|-------------|--------------|-------------|
| 4723      | NDUFV1   | 3.638953528 | 9.964966088 | 5.8399E-110  | 2.6092E-108 |
| 2167      | FABP4    | 3.636896435 | 9.988551066 | 2.81797E-85  | 7.94439E-84 |
| 137735    | ABRA     | 3.636043312 | 4.121473401 | 1.71E-74     | 3.8538E-73  |
| 5162      | PDHB     | 3.631743212 | 9.192117257 | 8.9428E-109  | 3.9379E-107 |
| 50        | ACO2     | 3.631380912 | 10.10539374 | 8.83563E-90  | 2.71101E-88 |
| 866       | SERPINA6 | 3.624747787 | 5.660655565 | 1.66652E-33  | 1.44602E-32 |
| 3960      | LGALS4   | 3.62425358  | 7.107127826 | 3.37588E-79  | 8.58294E-78 |
| 25940     | FAM98A   | 3.618145766 | 7.660858176 | 3.18099E-85  | 8.95129E-84 |
| 1832      | DSP      | 3.618036516 | 9.193687816 | 5.6964E-102  | 2.2318E-100 |
| 442253    | NEPNP    | 3.617709704 | 2.600396811 | 1.17065E-63  | 2.09701E-62 |
| 64837     | KLC2     | 3.614059688 | 4.858388776 | 1.33239E-22  | 8.02798E-22 |
| 844       | CASQ1    | 3.611156171 | 2.178483435 | 4.46336E-51  | 5.95115E-50 |
| 143503    | OR51E1   | 3.605485399 | 3.679283105 | 9.45696E-75  | 2.14395E-73 |
| 1431      | CS       | 3.599551352 | 10.07464949 | 2.6819E-103  | 1.0756E-101 |
| 2487      | FRZB     | 3.598360724 | 3.159345927 | 4.00235E-65  | 7.42183E-64 |
| 113675    | SDSL     | 3.598243566 | 3.992247599 | 2.09335E-71  | 4.39373E-70 |
| 5827      | PXMP2    | 3.586471442 | 8.355237227 | 1.00199E-81  | 2.64429E-80 |
| 25809     | TLL1     | 3.582562881 | 7.512128677 | 3.51744E-81  | 9.23478E-80 |
| 4548      | MTR      | 3.578047888 | 4.505963942 | 4.16718E-79  | 1.05421E-77 |
| 4283      | CXCL9    | 3.560721403 | 2.838042481 | 4.04083E-50  | 5.28629E-49 |
| 5163      | PDK1     | 3.559244676 | 5.572098523 | 1.81548E-85  | 5.13715E-84 |
| 27089     | UQCRCQ   | 3.55663258  | 10.45649893 | 9.2084E-104  | 3.7223E-102 |
| 1149      | CIDEA    | 3.554397252 | 7.15192046  | 4.82509E-71  | 1.0072E-69  |
| 4190      | MDH1     | 3.549760393 | 5.458005355 | 1.43566E-75  | 3.31373E-74 |
| 3945      | LDHB     | 3.547821264 | 10.36101438 | 1.651E-104   | 6.2773E-103 |
| 26502     | NARF     | 3.544766572 | 5.052085161 | 9.5433E-76   | 2.22289E-74 |
| 10570     | DPYSL4   | 3.526272287 | 2.323457906 | 2.56567E-60  | 4.24279E-59 |
| 28992     | MACROD1  | 3.523740871 | 8.268136195 | 5.57993E-70  | 1.13682E-68 |
| 55856     | ACOT13   | 3.519898259 | 9.038659237 | 3.50631E-87  | 1.10302E-85 |
| 84263     | HSDL2    | 3.519771398 | 8.343082397 | 2.83072E-92  | 9.14448E-91 |
| 5028      | P2RY1    | 3.508991103 | 5.945833789 | 1.72456E-73  | 3.79702E-72 |
| 4715      | NDUFB9   | 3.506246403 | 9.644329535 | 1.4288E-105  | 5.9328E-104 |
| 6253      | RTN2     | 3.502280109 | 4.596614445 | 2.10063E-74  | 4.72718E-73 |
| 55847     | CISD1    | 3.500281943 | 7.586913641 | 6.21217E-54  | 8.86293E-53 |
| 199953    | TMEM201  | 3.498799989 | 7.468020921 | 1.18544E-78  | 2.95489E-77 |
| 112399    | EGLN3    | 3.498152416 | 5.282960319 | 1.4518E-73   | 3.20571E-72 |
| 7386      | UQCRCF1  | 3.497096376 | 10.26977585 | 1.38396E-84  | 3.85188E-83 |
| 7111      | TMOD1    | 3.494914319 | 8.612908343 | 1.6744E-99   | 6.72717E-98 |
| 9377      | COX5A    | 3.493897794 | 11.14510709 | 7.9243E-111  | 3.5718E-109 |
| 8803      | SUCLA2   | 3.493102789 | 8.45135663  | 2.77541E-92  | 9.98481E-91 |
| 9260      | PDLM7    | 3.490109491 | 4.949125456 | 6.04143E-77  | 1.58434E-75 |
| 8110      | DPF3     | 3.485028091 | 2.051727968 | 1.00575E-56  | 1.54141E-55 |
| 35        | ACADS    | 3.483808546 | 4.996422001 | 1.06042E-78  | 2.65626E-77 |
| 57644     | MYH7B    | 3.482998482 | 5.061547042 | 1.32294E-74  | 2.99475E-73 |
| 2631      | NIPSNAP2 | 3.479875302 | 9.211793944 | 1.0145E-100  | 3.9045E-99  |
| 128308    | MRPL55   | 3.479320604 | 6.452758077 | 4.32621E-82  | 1.1577E-80  |
| 4719      | NDUFS1   | 3.479131303 | 8.82282077  | 4.36698E-90  | 1.3535E-88  |
| 10060     | ABCC9    | 3.47679412  | 7.683352802 | 5.86421E-73  | 1.33341E-73 |
| 93649     | MYOCD    | 3.466250103 | 6.098124282 | 7.25744E-61  | 1.21861E-59 |
| 6425      | SFRP5    | 3.463809119 | 4.302073561 | 1.2827E-72   | 2.75277E-71 |
| 4060      | LUM      | 3.461721316 | 6.78869053  | 1.86387E-72  | 3.99439E-71 |
| 388630    | TRABD2B  | 3.459208367 | 7.112109431 | 1.22536E-75  | 2.8369E-74  |
| 131377    | KLHL40   | 3.459116501 | 3.224887318 | 5.39298E-63  | 9.55971E-62 |
| 54946     | SLC41A3  | 3.452163173 | 6.905122962 | 3.26851E-80  | 8.49369E-79 |
| 25974     | MMACHC   | 3.4465342   | 4.316192601 | 2.17217E-65  | 4.06252E-64 |
| 10343     | PKDREJ   | 3.445695582 | 2.303777041 | 5.6502E-59   | 9.07835E-58 |
| 5569      | PKIA     | 3.434554004 | 7.900462334 | 2.37537E-79  | 6.05938E-78 |
| 3743      | KCNA7    | 3.424336118 | 3.510662616 | 7.67004E-67  | 1.47419E-65 |
| 4704      | NDUFA9   | 3.42059125  | 9.609664605 | 3.9841E-101  | 1.5451E-99  |
| 1352      | COX10    | 3.417276082 | 7.05247425  | 2.99656E-65  | 5.57025E-64 |
| 79849     | PZDZ3    | 3.41511466  | 2.83307413  | 9.80919E-65  | 1.79502E-63 |
| 286       | ANK1     | 3.414285145 | 6.655134718 | 9.70166E-76  | 2.25634E-74 |
| 29098     | RANGRF   | 3.412520925 | 6.890519052 | 8.48931E-72  | 1.80162E-70 |
| 788       | SLC25A20 | 3.412126042 | 7.877631392 | 2.13515E-87  | 6.31047E-86 |
| 23762     | OSBP2    | 3.410073935 | 4.24966847  | 3.35791E-70  | 6.87785E-69 |
| 70        | ACTC1    | 3.404145811 | 11.19452312 | 2.96453E-108 | 1.08628E-96 |
| 3421      | IDH3G    | 3.400695871 | 10.47272952 | 4.9197E-99   | 1.82458E-97 |
| 4711      | NDUF85   | 3.397507766 | 8.554370413 | 2.29435E-97  | 8.15295E-96 |
| 388595    | TMEM82   | 3.397091072 | 4.398312047 | 7.70995E-76  | 1.43689E-75 |
| 2946      | GSTM2    | 3.396613237 | 4.893589627 | 2.71895E-75  | 6.2194E-74  |
| 2766      | GMPR     | 3.396320491 | 6.138844079 | 3.16283E-76  | 7.46955E-75 |
| 339229    | OXL1     | 3.394588298 | 7.672175944 | 1.6404E-82   | 4.4207E-81  |
| 4698      | NDUFA5   | 3.393672979 | 10.32138684 | 2.2532E-102  | 8.8965E-101 |
| 51295     | ECSIT    | 3.390916456 | 7.02772197  | 4.45408E-69  | 8.93153E-68 |
| 58528     | RRAGD    | 3.389003464 | 6.850429448 | 7.48518E-78  | 1.83291E-76 |
| 80045     | GPR157   | 3.384891838 | 5.067058694 | 3.28439E-85  | 9.22528E-84 |
| 10625     | IVNS1ABP | 3.384872295 | 5.498905692 | 1.71564E-65  | 3.22844E-64 |
| 900       | CCNG1    | 3.384749634 | 9.464390506 | 1.8517E-109  | 8.2011E-108 |
| 123103    | KLHL33   | 3.377303575 | 2.909443315 | 6.97692E-54  | 9.94472E-53 |
| 51805     | COQ3     | 3.374266273 | 4.863949896 | 6.6528E-77   | 1.60086E-75 |
| 23332     | CLASP1   | 3.366959347 | 7.655845255 | 3.62006E-61  | 6.16065E-60 |
| 2101      | ESRRA    | 3.352638431 | 6.567514848 | 9.07149E-80  | 2.33748E-78 |
| 3757      | KCNH2    | 3.352050029 | 4.789745052 | 2.79661E-81  | 7.35494E-80 |
| 3600      | IL15     | 3.351878083 | 7.344902284 | 6.18305E-79  | 1.55903E-77 |
| 154865    | IQB      | 3.346051305 | 5.059825193 | 8.70581E-83  | 2.35442E-81 |
| 4286      | MITF     | 3.345894478 | 6.791027182 | 3.59986E-80  | 9.33884E-79 |
| 81833     | SPACA1   | 3.33908752  | 3.097346963 | 1.35666E-59  | 2.20764E-58 |
| 9355      | LHX2     | 3.335005634 | 4.972266744 | 1.01642E-64  | 1.85776E-63 |
| 388591    | RNF207   | 3.33096817  | 5.870530038 | 1.75432E-65  | 3.29716E-64 |
| 3679      | ITGA7    | 3.329924126 | 6.936527402 | 5.26045E-78  | 1.29228E-76 |
| 26154     | ABCA12   | 3.329606246 | 1.465100886 | 7.07054E-45  | 8.12926E-44 |
| 11326     | VSIG4    | 3.327274305 | 2.133378597 | 5.528E-56    | 8.32196E-55 |
| 64172     | OSGEPL1  | 3.325848894 | 5.967465458 | 4.69475E-61  | 7.94417E-60 |
| 10580     | SORBS1   | 3.325373996 | 8.013403556 | 2.09283E-75  | 4.79437E-74 |
| 4702      | NDUFA8   | 3.309306901 | 9.905286954 | 1.58429E-91  | 5.00163E-90 |
| 55686     | MREG     | 3.307803744 | 3.724421383 | 2.21348E-65  | 4.13471E-64 |

## Downregulated genes in TBI kidney compared with Sham group

| Entrez ID | SYMBOL   | logFC       | logCPM      | P-Value     | FDR          |
|-----------|----------|-------------|-------------|-------------|--------------|
| 688       | KLF5     | -4.05238217 | 5.369337539 | 4.52619E-98 | 1.64276E-96  |
| 94234     | FOXQ1    | -4.04856087 | 4.666848133 | 1.9377E-80  | 5.05257E-79  |
| 26872     | STAP1    | -4.04766414 | 2.018043696 | 4.94148E-64 | 8.87259E-63  |
| 338699    | ANKRD42  | -4.04459656 | 3.770812152 | 2.18342E-82 | 5.8634E-81   |
| 25984     | KRT23    | -4.03862808 | 4.622457045 | 4.2233E-99  | 1.57012E-97  |
| 80201     | HKDC1    | -4.02838109 | 2.239227558 | 2.92061E-70 | 5.99825E-69  |
| 120379    | PIH1D2   | -4.02608866 | 3.598703823 | 6.72796E-86 | 1.92156E-84  |
| 154       | ADRB2    | -4.02575454 | 4.765421173 | 1.69499E-83 | 4.60844E-82  |
| 5743      | PTGS2    | -4.01828252 | 4.522796335 | 1.10394E-70 | 2.27642E-69  |
| 6352      | CCL5     | -4.00235644 | 4.675242448 | 4.69437E-98 | 1.69976E-96  |
| 202915    | TMEM184A | -4.00059366 | 4.20724223  | 4.29551E-92 | 1.37889E-90  |
| 6361      | CCL17    | -3.99913552 | 2.827861793 | 2.09446E-68 | 4.11883E-67  |
| 10512     | SEMA3C   | -3.9878262  | 7.603079808 | 7.58473E-92 | 2.41388E-90  |
| 2166      | FAAH     | -3.98528636 | 4.432312909 | 1.638E-84   | 4.54241E-83  |
| 130733    | TMEM178A | -3.97699699 | 4.074924466 | 1.05563E-87 | 3.13814E-86  |
| 400224    | PLEKHD1  | -3.97676644 | 4.512136476 | 1.13589E-79 | 2.92195E-78  |
| 9185      | REPS2    | -3.97591642 | 5.083940503 | 4.4372E-107 | 1.8992E-105  |
| 54769     | DIRAS2   | -3.95975356 | 3.796062356 | 1.68157E-87 | 4.97953E-86  |
| 284018    | C17orf58 | -3.95622858 | 4.923739921 | 1.60754E-97 | 5.73906E-96  |
| 1437      | CSF2     | -3.95574568 | 1.517940329 | 1.22192E-54 | 1.76975E-53  |
| 221264    | AK9      | -3.95555046 | 2.709136382 | 2.56459E-56 | 3.89145E-55  |
| 374407    | DNAJB13  | -3.95265061 | 3.453608472 | 9.20227E-79 | 2.30888E-77  |
| 83538     | ODAD4    | -3.94624818 | 1.470295809 | 5.24703E-53 | 7.34873E-52  |
| 401236    | STMND1   | -3.94322551 | 3.846389232 | 4.74681E-74 | 1.06351E-72  |
| 162387    | MFS06L   | -3.94247791 | 2.424089899 | 1.95023E-60 | 3.23205E-59  |
| 219681    | ARMC3    | -3.94214962 | 1.978398832 | 3.68812E-62 | 6.41121E-61  |
| 79899     | PRR5L    | -3.94147662 | 3.446687444 | 7.13138E-76 | 1.66617E-74  |
| 84332     | DYDC2    | -3.93708227 | 1.359308308 | 5.43064E-51 | 7.22195E-50  |
| 221421    | RSPH9    | -3.92911962 | 6.933900172 | 8.20244E-97 | 2.89453E-95  |
| 54626     | HES2     | -3.92564732 | 1.92345843  | 2.66035E-42 | 2.89323E-41  |
| 122060    | SLAIN1   | -3.92229279 | 2.505146494 | 8.92439E-66 | 1.6856E-64   |
| 27134     | TJP3     | -3.92185939 | 4.537773912 | 3.38435E-95 | 1.1647E-93   |
| 4973      | OLR1     | -3.92134602 | 1.447735653 | 5.09739E-51 | 6.78468E-50  |
| 6909      | TBX2     | -3.91184232 | 3.145370477 | 6.25983E-76 | 1.46478E-74  |
| 9603      | NFE2L3   | -3.90536804 | 2.471828742 | 2.65324E-51 | 5.55005E-50  |
| 7472      | WNT2     | -3.90164581 | 4.740233276 | 5.52352E-93 | 1.81115E-91  |
| 6997      | TGDF1    | -3.88817515 | 1.318990114 | 1.17579E-46 | 1.418E-45    |
| 9244      | CRLF1    | -3.88640321 | 4.616402308 | 1.11108E-78 | 2.7786E-77   |
| 1268      | CNR1     | -3.8793359  | 0.947141753 | 1.32438E-47 | 1.63991E-46  |
| 2194      | FASN     | -3.87470172 | 2.41472908  | 2.17833E-51 | 2.91973E-50  |
| 200373    | CFAP221  | -3.8733706  | 1.537619367 | 7.58153E-52 | 1.03157E-50  |
| 376267    | RAB15    | -3.87060495 | 5.868310575 | 3.12445E-87 | 9.21652E-86  |
| 3932      | LCK      | -3.87027765 | 3.755244321 | 1.79031E-82 | 4.81618E-81  |
| 2729      | GLCL     | -3.86718012 | 6.213528147 | 1.18705E-85 | 3.36513E-84  |
| 89780     | WNT3A    | -3.866423   | 2.578284783 | 1.86866E-42 | 2.04243E-41  |
| 11185     | INMT     | -3.86529171 | 9.896150987 | 4.7436E-117 | 2.3843E-115  |
| 270       | AMPD1    | -3.86264579 | 1.563555876 | 8.20135E-55 | 1.19236E-53  |
| 26232     | FBXO2    | -3.85631451 | 3.644745443 | 3.53991E-77 | 5.57209E-76  |
| 29785     | CYP251   | -3.85527934 | 7.190584498 | 1.54776E-86 | 4.52194E-85  |
| 284485    | RIIAD1   | -3.85420593 | 6.400341741 | 1.38018E-94 | 4.70739E-93  |
| 64711     | HS3ST6   | -3.84257037 | 2.979148149 | 1.83402E-64 | 3.33617E-63  |
| 136       | ADORA2B  | -3.84226405 | 2.665345853 | 8.32918E-68 | 1.61921E-66  |
| 2255      | FGF10    | -3.84105961 | 4.197869597 | 6.72879E-61 | 1.13358E-59  |
| 7185      | TRAF1    | -3.83864683 | 4.298680588 | 5.82734E-89 | 1.7676E-87   |
| 92241     | RCSO1    | -3.83494458 | 5.560023001 | 1.84783E-66 | 3.52495E-65  |
| 5357      | PLS1     | -3.83241507 | 3.899361152 | 1.74596E-71 | 3.6747E-70   |
| 10804     | GJB6     | -3.82315393 | 3.600678078 | 3.16386E-66 | 7.80999E-77  |
| 10630     | PDPN     | -3.82164853 | 8.302353876 | 3.50701E-96 | 1.22906E-94  |
| 54058     | C21orf58 | -3.81360886 | 5.176003699 | 2.95325E-65 | 5.49642E-64  |
| 343990    | CRACD1   | -3.80440801 | 4.952380117 | 1.84855E-85 | 5.22106E-84  |
| 4057      | LTF      | -3.79698322 | 7.355996671 | 2.5652E-93  | 5.852093E-92 |
| 200879    | LIPH     | -3.79473757 | 1.815855115 | 1.13466E-56 | 1.73518E-55  |
| 54546     | RNF186   | -3.78683021 | 4.861861361 | 8.89149E-95 | 3.03942E-93  |
| 5329      | PLAUR    | -3.78293377 | 4.810422617 | 2.49238E-94 | 8.46301E-93  |
| 10625     | SPINT2   | -3.77705165 | 6.704598262 | 4.80635E-93 | 1.57938E-91  |
| 79846     | CFAP69   | -3.774898   | 5.123855336 | 1.501E-99   | 5.66321E-98  |
| 441631    | TSAN11   | -3.77189844 | 5.288756312 | 1.73916E-67 | 2.72E-56     |
| 113452    | TMEM54   | -3.76532756 | 3.105961983 | 8.60878E-62 | 1.48972E-60  |
| 143689    | PIWIL4   | -3.76411458 | 1.024270275 | 7.33406E-46 | 8.66031E-45  |
| 91768     | CABLES1  | -3.76408683 | 6.186411827 | 7.50754E-76 | 1.75138E-74  |
| 9514      | GAL3ST1  | -3.76293625 | 2.656429985 | 5.10153E-62 | 8.84805E-61  |
| 874       | CBR3     | -3.76273616 | 4.057719977 | 1.17263E-95 | 4.07221E-94  |
| 4117      | MAK      | -3.76186809 | 5.03810431  | 1.38212E-29 | 1.05489E-28  |
| 149473    | CCDC24   | -3.76009934 | 2.647320049 | 7.43159E-60 | 1.21971E-58  |
| 3512      | CHAIIN   | -3.75984852 | 1.85170405  | 5.27444E-55 | 7.70492E-54  |
| 8714      | ABCC3    | -3.75958023 | 4.725653665 | 7.32881E-90 | 2.2532E-88   |
| 200162    | SPAG17   | -3.75064585 | 2.53315155  | 7.92891E-65 | 1.45618E-63  |
| 114327    | EFHC1    | -3.74159983 | 4.831895782 | 1.11857E-87 | 3.31879E-86  |
| 11082     | ESM1     | -3.73851815 | 3.928963947 | 9.05617E-79 | 2.27596E-77  |
| 1555      | CYP2B6   | -3.73831219 | 6.87087937  | 2.5495E-81  | 6.71661E-80  |
| 80217     | CFAP43   | -3.73534276 | 3.075706514 | 1.43489E-61 | 2.45798E-60  |
| 283948    | NHLRC4   | -3.73040932 | 2.082249983 | 5.92253E-45 | 1.06137E-43  |
| 931       | MSA41    | -3.72766262 | 2.575995321 | 5.42331E-57 | 8.8374E-56   |
| 729       | C6       | -3.723862   | 3.945183145 | 3.25028E-50 | 4.26669E-49  |
| 130576    | LYPD6B   | -3.71754725 | 2.168198242 | 1.01148E-59 | 1.69496E-58  |
| 1636      | ACE      | -3.71184849 | 7.709284249 | 1.90176E-95 | 6.57439E-94  |
| 3112      | HLA-DQB  | -3.70990883 | 2.139953043 | 2.92164E-56 | 4.42006E-55  |
| 56964     | WDR93    | -3.7074663  | 1.736162874 | 1.41652E-53 | 2.00041E-52  |
| 10103     | TSAN1    | -3.70620828 | 3.411662654 | 2.31374E-69 | 4.65796E-68  |
| 389376    | SFTA2    | -3.70581248 | 6.844393081 | 5.69045E-13 | 2.16779E-12  |
| 4069      | LYZ      | -3.70370668 | 8.903897191 | 8.3443E-107 | 1.35716E-105 |
| 10147     | SUGP2    | -3.70245468 | 3.579038011 | 4.84762E-74 | 1.0845E-72   |
| 9476      | NAPSA    | -3.70148141 | 8.517442726 | 8.30835E-81 | 2.17383E-79  |
| 54511     | HMGCLL1  | -3.69951289 | 3.857926905 | 1.57073E-44 | 1.7911E-43   |
| 23284     | ADGR13   | -3.687425   | 2.300200719 | 8.79734E-61 | 1.47556E-59  |
| 13966     | CLDN7    | -3.68000361 | 6.09530535  | 1.07813E-75 | 2.49993E-74  |

Supplementary table 1

## Upregulated genes in TBI kidney compared with Sham group

| Entrez ID | SYMBOL      | logFC       | logCPM      | P-Value     | FDR          |
|-----------|-------------|-------------|-------------|-------------|--------------|
| 148113    | CILP2       | 3.305142641 | 3.595326151 | 1.22429E-61 | 2.10666E-60  |
| 26576     | SRPK3       | 3.304644763 | 6.021296177 | 1.68456E-70 | 3.46901E-69  |
| 125228    | FAM210A     | 3.303312217 | 6.626265338 | 6.6694E-55  | 9.73337E-54  |
| 348093    | RBPM52      | 3.30196547  | 4.038627229 | 9.67194E-65 | 1.77203E-63  |
| 10742     | RAI2        | 3.301210689 | 6.07986631  | 3.23696E-68 | 6.32299E-67  |
| 593       | BCKDHA      | 3.300114319 | 6.933366525 | 1.70316E-59 | 2.76266E-58  |
| 51559     | NTSDC3      | 3.300081954 | 6.409929434 | 0.001058633 | 0.001902376  |
| 1537      | CYC1        | 3.299926642 | 10.36740701 | 2.94594E-78 | 7.29563E-77  |
| 1311      | COMP        | 3.299903508 | 1.25955488  | 2.91262E-34 | 2.59202E-33  |
| 4714      | NDUF8       | 3.288129681 | 10.5054956  | 1.01762E-91 | 3.22597E-90  |
| 79091     | METTL22     | 3.287177627 | 5.991870553 | 6.50625E-72 | 1.38462E-70  |
| 2271      | FH          | 3.285708677 | 8.830263531 | 1.46028E-75 | 3.36547E-74  |
| 128989    | TANGO2      | 3.279564959 | 7.894600594 | 3.49916E-71 | 7.32426E-70  |
| 5160      | PDHA1       | 3.278410209 | 10.15259749 | 3.03738E-93 | 1.00457E-91  |
| 84233     | TMEM126A    | 3.277061537 | 8.87150115  | 6.68484E-75 | 5.11775E-73  |
| 6392      | SDHD        | 3.276167237 | 9.861954823 | 2.73557E-93 | 9.06714E-92  |
| 732       | C8B         | 3.26839208  | 7.935352394 | 1.77378E-80 | 4.63304E-79  |
| 333926    | PPM1J       | 3.265134075 | 4.769137383 | 1.42675E-79 | 3.86399E-78  |
| 133522    | PPARGC1B    | 3.260865831 | 5.658105044 | 2.96669E-72 | 6.34E-71     |
| 3777      | CKNK3       | 3.254865104 | 5.734800038 | 4.73739E-66 | 8.99222E-65  |
| 4705      | NDUFA10     | 3.25472325  | 10.06515007 | 1.3962E-90  | 4.34499E-89  |
| 140825    | NEURL2      | 3.253872153 | 6.170639147 | 3.34293E-68 | 6.53197E-67  |
| 28969     | BZW2        | 3.250006553 | 7.051308613 | 2.60041E-64 | 2.74792E-61  |
| 55084     | SOBP        | 3.242754945 | 4.295032662 | 4.35709E-71 | 9.10757E-70  |
| 12744     | IL17F       | 3.242664389 | 3.357570396 | 2.98077E-57 | 4.464283E-56 |
| 4694      | NDUFA1      | 3.238127054 | 9.593397307 | 1.31626E-97 | 4.71017E-96  |
| 65078     | RTN4R       | 3.237529791 | 2.278533894 | 4.92981E-52 | 6.74978E-51  |
| 100126572 | GJE1        | 3.236140903 | 2.999882769 | 2.52312E-42 | 2.74792E-41  |
| 1363      | CPE         | 3.234866967 | 8.959069044 | 1.92856E-88 | 5.78946E-87  |
| 65991     | FUNDC2      | 3.232750299 | 6.227053714 | 5.84245E-71 | 1.21459E-69  |
| 57157     | PHTF2       | 3.225256194 | 7.743449425 | 1.00307E-68 | 1.99309E-67  |
| 1184      | CLCN5       | 3.223436468 | 5.076511538 | 5.94186E-78 | 1.45733E-76  |
| 375748    | ERCC6L2     | 3.222649308 | 1.616502582 | 7.66921E-45 | 8.81094E-44  |
| 781       | CACNA2D1    | 3.222431946 | 6.57787685  | 9.31278E-57 | 1.42871E-55  |
| 225145    | C6orf136    | 3.218144599 | 5.26801099  | 8.45707E-69 | 1.687E-67    |
| 90624     | LYRM7       | 3.217337613 | 4.24592521  | 7.6902E-66  | 1.45609E-64  |
| 498       | ATP5F1A     | 3.211111213 | 10.4293734  | 2.09765E-59 | 3.38871E-58  |
| 6575      | SLC20A2     | 3.197626333 | 6.585780282 | 2.52677E-64 | 5.49086E-63  |
| 6329      | SCN4A       | 3.192131471 | 2.178106569 | 6.53798E-48 | 8.14848E-47  |
| 4722      | NDUFS3      | 3.190885235 | 6.668551841 | 5.21265E-73 | 1.13138E-71  |
| 493       | ATP2B4      | 3.189027351 | 4.403189042 | 3.03136E-66 | 5.76826E-65  |
| 111064647 | CSNKA2IP    | 3.187450408 | 2.150732447 | 3.41386E-52 | 4.70792E-51  |
| 53354     | PANK1       | 3.187289517 | 4.900228253 | 3.80156E-79 | 9.63315E-78  |
| 27347     | STK39       | 3.184629179 | 6.024466054 | 2.72566E-62 | 4.75978E-61  |
| 4720      | NDUFS2      | 3.179131753 | 9.138247322 | 6.04046E-67 | 1.16245E-65  |
| 521       | ATP5ME      | 3.177079736 | 8.923855656 | 4.31489E-81 | 1.1309E-79   |
| 388962    | BOLA3       | 3.175835416 | 8.727474086 | 1.04618E-84 | 2.92777E-83  |
| 3613      | IMPA2       | 3.175609626 | 5.022636125 | 4.18876E-65 | 7.27997E-64  |
| 1474      | CTF6        | 3.173444177 | 3.36116195  | 2.08758E-52 | 2.89195E-51  |
| 375189    | PFN4        | 3.173278063 | 2.264656826 | 1.67824E-49 | 2.16767E-48  |
| 539       | ATP5PO      | 3.172981414 | 4.316701479 | 3.38149E-64 | 3.38149E-64  |
| 9254      | CACNA2D2    | 3.172660817 | 3.904560635 | 2.45491E-40 | 2.55351E-39  |
| 54927     | CHCHD3      | 3.17224668  | 8.086132721 | 1.7825E-57  | 1.84843E-56  |
| 374291    | NDUFS7      | 3.172101589 | 9.493948112 | 7.19393E-82 | 1.90508E-80  |
| 5260      | PHKG1       | 3.171099432 | 3.426748227 | 7.23324E-50 | 9.40629E-49  |
| 291       | SLC25A4     | 3.169906209 | 1.66805881  | 7.1262E-99  | 2.62381E-97  |
| 11061     | CNMD        | 3.165474717 | 0.454400842 | 3.49066E-34 | 3.101E-33    |
| 229       | ALDOB       | 3.160904712 | 3.323813608 | 1.01352E-53 | 1.441195E-52 |
| 34        | ACADM       | 3.159815939 | 10.12696314 | 2.15732E-79 | 5.51234E-78  |
| 65012     | SLC26A10    | 3.155930351 | 2.303982878 | 1.36044E-49 | 1.76165E-48  |
| 1638      | DCT         | 3.154150195 | 1.773234895 | 1.83481E-42 | 2.0083E-41   |
| 100996928 | FMC1-LUC7L2 | 3.147399497 | 9.328565038 | 9.05498E-80 | 2.33716E-78  |
| 23417     | MLYCD       | 3.144085479 | 8.36612457  | 1.45612E-71 | 3.07314E-70  |
| 3177      | SLC29A2     | 3.142455777 | 3.357445447 | 7.86364E-59 | 1.2595E-57   |
| 56950     | SMYD2       | 3.139049766 | 7.939462089 | 7.63223E-71 | 1.58022E-69  |
| 55967     | NDUFA12     | 3.137125122 | 1.01682372  | 3.20024E-69 | 6.42571E-68  |
| 25829     | TMEM184B    | 3.134386964 | 7.714323273 | 5.50185E-73 | 1.19246E-71  |
| 2348      | FOLR1       | 3.132192913 | 2.810133104 | 1.86576E-53 | 2.62996E-52  |
| 92667     | MGME1       | 3.130754798 | 2.150911987 | 9.44322E-47 | 1.14065E-45  |
| 1892      | ECHS1       | 3.119815769 | 9.365672851 | 7.59866E-92 | 2.41388E-90  |
| 222537    | HS3ST5      | 3.116113706 | 2.018219301 | 3.02967E-48 | 3.80398E-47  |
| 9551      | ATP5MF      | 3.114184669 | 9.686507642 | 5.13384E-72 | 1.0956E-70   |
| 122622    | ADSS1       | 3.111052349 | 9.920049938 | 1.52195E-47 | 1.87847E-46  |
| 8082      | SSPN        | 3.102792963 | 9.027161257 | 1.24475E-71 | 2.63067E-70  |
| 92154     | MTSS2       | 3.101964427 | 7.021196713 | 1.98572E-14 | 8.24507E-14  |
| 283927    | NUDT7       | 3.101662622 | 5.833407931 | 3.35817E-62 | 5.84429E-61  |
| 5250      | SLC25A3     | 3.100623068 | 6.875602062 | 1.04102E-72 | 2.24355E-71  |
| 506       | ATP5F1B     | 3.098221449 | 7.607345201 | 3.03592E-57 | 4.72392E-56  |
| 115286    | SLC25A26    | 3.096250257 | 6.248299452 | 9.26289E-71 | 1.91525E-69  |
| 58494     | JAM2        | 3.088703022 | 5.98637588  | 4.18023E-54 | 6.00319E-53  |
| 56172     | ANKH        | 3.087168108 | 8.001247617 | 1.58943E-66 | 3.503582E-65 |
| 64065     | PERP        | 3.086267621 | 7.8592356   | 1.73614E-77 | 4.22425E-76  |
| 9892      | SNAP91      | 3.085836137 | 1.126103746 | 1.73524E-34 | 1.55328E-33  |
| 5834      | PYGB        | 3.084735337 | 8.20333246  | 8.3929E-73  | 1.81391E-71  |
| 966       | CD59        | 3.082911132 | 7.006097374 | 2.50915E-61 | 4.279E-60    |
| 6182      | MRPL12      | 3.079236537 | 8.139913535 | 1.02593E-70 | 2.11841E-69  |
| 5141      | PDE4A       | 3.073194249 | 6.285823001 | 1.27254E-54 | 1.84133E-53  |
| 92106     | OXNAD1      | 3.069292589 | 6.088745147 | 4.94239E-56 | 7.46243E-55  |
| 84319     | CMSS1       | 3.066699338 | 6.09233896  | 8.18293E-62 | 1.41763E-60  |
| 2108      | ETFA        | 3.06422473  | 9.426645317 | 5.61221E-79 | 1.41743E-77  |
| 8604      | SLC25A12    | 3.056924201 | 7.080322931 | 1.98338E-56 | 3.01853E-55  |
| 4724      | NDUFS4      | 3.050496836 | 9.303378177 | 2.02331E-69 | 4.37865E-68  |
| 9886      | RHOBTB1     | 3.049537443 | 7.512921127 | 7.64557E-69 | 1.52712E-67  |
| 80298     | MTERF2      | 3.049367274 | 4.513928004 | 1.72933E-56 | 2.63715E-55  |
| 1063      | CENPF       | 3.047626966 | 1.333990608 | 2.74608E-36 | 2.59815E-35  |
| 6604      | SMARCD3     | 3.041607522 | 6.344027397 | 9.33305E-68 | 1.81206E-66  |

## Downregulated genes in TBI kidney compared with Sham group

| Entrez ID | SYMBOL   | logFC       | logCPM      | P-Value     | FDR         |
|-----------|----------|-------------|-------------|-------------|-------------|
| 93664     | CADPS2   | -3.67582224 | 3.713555245 | 2.54836E-70 | 5.24077E-69 |
| 8876      | VNN1     | -3.67083055 | 4.386847493 | 4.3635E-84  | 1.19918E-82 |
| 1580      | CYP4B1   | -3.66749562 | 7.868175961 | 1.14938E-96 | 4.04666E-95 |
| 11072     | DUSP14   | -3.6663395  | 5.248261723 | 1.32857E-93 | 4.46166E-92 |
| 3383      | ICAM1    | -3.66248513 | 7.792963841 | 5.1839E-94  | 1.60344E-88 |
| 440       | ASNS     | -3.65542283 | 6.29240687  | 4.77454E-73 | 1.03777E-71 |
| 56341     | PRMT8    | -3.65009907 | 3.840092622 | 5.41187E-69 | 1.08237E-67 |
| 8786      | RGS11    | -3.64617066 | 3.801186083 | 3.01192E-68 | 5.90027E-67 |
| 3202      | HOXA5    | -3.6426749  | 5.128807382 | 3.21363E-86 | 9.30005E-85 |
| 8045      | RASSF7   | -3.61952805 | 4.040579475 | 6.07188E-76 | 1.42298E-74 |
| 930       | CD19     | -3.61800259 | 2.648240863 | 2.16051E-63 | 3.85661E-62 |
| 79083     | MLPH     | -3.61588539 | 6.405484641 | 9.82787E-78 | 2.39888E-76 |
| 643037    | C11orf97 | -3.61466518 | 2.314606898 | 8.05161E-60 | 1.31863E-58 |
| 2013      | EMP2     | -3.61309201 | 8.287341892 | 1.65385E-97 | 5.89063E-96 |
| 199223    | TTC21A   | -3.61228969 | 2.112744039 | 1.41932E-51 | 1.91922E-50 |
| 128218    | TMEM125  | -3.59936493 | 4.353812276 | 5.44804E-82 | 1.45281E-80 |
| 161502    | CFAP161  | -3.59182361 | 5.47980888  | 3.67756E-75 | 8.39956E-74 |
| 21        | ABCA3    | -3.58908527 | 6.745904057 | 6.6868E-84  | 1.83108E-82 |
| 6338      | SCNN1B   | -3.5866939  | 6.81554804  | 2.82044E-21 | 1.61531E-20 |
| 8842      | PROM1    | -3.5846028  | 2.752484995 | 1.09872E-57 | 1.72544E-56 |
| 339778    | FAM166C  | -3.57756002 | 4.31593291  | 8.2524E-64  | 1.48001E-62 |
| 54766     | BTG4     | -3.57541156 | 0.369053891 | 9.47614E-29 | 7.01188E-28 |
| 221002    | RASGEF1A | -3.57072005 | 6.906530107 | 1.85672E-55 | 2.75711E-54 |
| 286343    | LURAP1L  | -3.56967489 | 6.428759296 | 5.44818E-90 | 1.67839E-88 |
| 54768     | HYDIN    | -3.56675364 | 1.923018563 | 1.31696E-54 | 1.902E-53   |
| 6507      | SLC1A3   | -3.56408807 | 5.440071845 | 1.27849E-66 | 2.44803E-65 |
| 120224    | TMEM45B  | -3.56013661 | 2.05554863  | 5.45391E-53 | 7.63148E-52 |
| 255101    | CFAP65   | -3.55609142 | 4.661411613 | 1.4124E-14  | 5.99981E-14 |
| 8444      | DYRK3    | -3.55011517 | 2.59593836  | 2.65289E-57 | 4.13635E-56 |
| 9320      | KBTBD11  | -3.54431491 | 1.187010577 | 7.44664E-46 | 8.77967E-45 |
| 387712    | ENO4     | -3.5415199  | 3.893779699 | 1.01687E-71 | 2.15204E-70 |
| 5349      | FXYD3    | -3.54039677 | 5.188394397 | 7.8992E-87  | 3.21669E-85 |
| 79919     | MAB21L4  | -3.53885886 | 4.80336415  | 4.87081E-76 | 1.14326E-74 |
| 54101     | RIPK4    | -3.53872104 | 5.61252591  | 1.37374E-74 | 3.10513E-73 |
| 92304     | SCGB3A1  | -3.53663099 | 6.175761669 | 5.77788E-74 | 1.28697E-72 |
| 26064     | RAI14    | -3.53356798 | 4.518078551 | 3.9308E-78  | 9.67193E-77 |
| 23255     | MTCL1    | -3.52864051 | 4.451173185 | 6.52926E-72 | 1.38758E-70 |
| 51176     | LEF1     | -3.52202114 | -0.59841364 | 4.35328E-26 | 2.98689E-25 |
| 56159     | TEX11    | -3.52148254 | 2.75728583  | 2.46726E-61 | 4.21227E-60 |
| 26298     | EHF      | -3.52141945 | 4.352456638 | 3.67898E-77 | 8.89476E-76 |
| 154141    | MBOAT1   | -3.52057233 | 4.461183586 | 5.58008E-82 | 1.48543E-80 |
| 203190    | LG13     | -3.51997343 | 6.601522333 | 3.21562E-87 | 9.46718E-86 |
| 9073      | CLDN8    | -3.51952973 | 1.006347609 | 9.69086E-44 | 1.0904E-42  |
| 2706      | GJB2     | -3.51402908 | 2.733514353 | 2.27526E-63 | 4.05197E-62 |
| 93099     | DMKN     | -3.51123516 | 6.618790477 | 1.15699E-88 | 3.49383E-87 |
| 653       | BMP5     | -3.50509488 | 3.603820793 | 1.6735E-63  | 2.99078E-62 |
| 861       | RUNX1    | -3.50277308 | 5.175218446 | 1.46776E-60 | 2.44307E-59 |
| 5251      | PHOX     | -3.48631781 | 2.278406334 | 5.80985E-56 | 8.37656E-55 |
| 3200      | HOXA3    | -3.48579358 | 2.925519987 | 4.17285E-65 | 7.70939E-64 |
| 2327      | FMO2     | -3.48194645 | 6.787101736 | 3.99179E-73 | 8.70109E-72 |
| 220296    | HEPACAM  | -3.4733222  | -0.01705381 | 1.23545E-31 | 1.01113E-30 |
| 57126     | CD177    | -3.46367105 | 2.197629186 | 1.1458E-55  | 1.70975E-54 |
| 58473     | PLEKHB1  | -3.46200631 | 7.213167722 | 1.23276E-82 | 3.32802E-81 |
| 83853     | ROPN1L   | -3.4581561  | 2.23898202  | 2.48853E-42 | 2.71218E-41 |
| 10100     | TSPAN2   | -3.45503944 | 6.606622441 | 2.94939E-70 | 6.04921E-69 |
| 84858     | ZNF503   | -3.45397326 | 4.012211233 | 6.69071E-55 | 4.12335E-54 |
| 149499    | LRRC71   | -3.4492758  | 2.373749239 | 3.29694E-70 | 8.48737E-68 |
| 974       | CD79B    | -3.44908759 | 6.079309083 | 2.39674E-79 | 6.10369E-78 |
| 654429    | LRTM2    | -3.44764666 | 3.546546561 | 5.34437E-61 | 9.01346E-60 |
| 3204      | HOXA7    | -3.44756285 | 4.79907446  | 2.46116E-76 | 5.8486E-75  |
| 7057      | THBS1    | -3.44507883 | 4.988904322 | 1.71312E-76 | 4.90067E-75 |
| 64518     | TEKT3    | -3.44261032 | -0.23168958 | 2.52834E-27 | 1.91721E-26 |
| 2707      | GJB3     | -3.44182898 | 3.155940199 | 1.30094E-61 | 2.23604E-60 |
| 10663     | CKCR6    | -3.44177679 | 2.728958651 | 3.07678E-61 | 5.22949E-60 |
| 4237      | MFAP2    | -3.44126494 | 5.456355391 | 2.64466E-72 | 5.65973E-71 |
| 17969     | DNAH8    | -3.43927313 | 4.025148959 | 8.36198E-73 | 1.80979E-72 |
| 26084     | ARHGEF26 | -3.4359361  | 3.85289037  | 1.77737E-65 | 3.3638E-64  |
| 91522     | COL23A1  | -3.43415436 | 4.597885143 | 9.01159E-69 | 1.79293E-67 |
| 548596    | CKMT11A  | -3.4325437  | 4.028153729 | 1.86961E-65 | 3.00093E-64 |
| 9663      | LPIN2    | -3.42559401 | 6.29628399  | 5.63991E-74 | 1.25982E-72 |
| 6899      | TBX1     | -3.41830202 | 2.651036175 | 3.0147E-50  | 3.96085E-49 |
| 400891    | LRRC74B  | -3.41680161 | 3.081665208 | 1.095E-28   | 8.07898E-28 |
| 100169851 | PATE3    | -3.41665041 | 6.157316841 | 2.60368E-80 | 6.77755E-79 |
| 155006    | TMEM213  | -3.41492422 | 4.528281335 | 9.59896E-29 | 7.09589E-28 |
| 153643    | FAM81B   | -3.41346807 | 2.799821473 | 7.5624E-56  | 1.10524E-54 |
| 149483    | CDC17    | -3.40981743 | 4.819305    | 3.516E-76   | 8.29082E-75 |
| 9914      | ATP2C2   | -3.40550238 | 2.356902179 | 4.34298E-49 | 5.53468E-48 |
| 54810     | GIPC2    | -3.39938108 | 6.203142536 | 1.21869E-73 | 2.94686E-72 |
| 441161    | OEOP     | -3.39729408 | 3.446437394 | 2.91235E-47 | 5.37723E-46 |
| 3231      | HOXD1    | -3.39488682 | -0.21693318 | 1.04357E-26 | 7.28784E-26 |
| 246176    | GAS2L2   | -3.39297587 | 2.414728517 | 5.20423E-38 | 5.11716E-37 |
| 163782    | KANK4    | -3.39124426 | 4.57947265  | 1.0759E-76  | 2.5808E-75  |
| 165679    | SPTSSB   | -3.39116947 | 1.560146954 | 2.22694E-46 | 2.66257E-45 |
| 1908      | EDN3     | -3.39082425 | 3.3495011   | 1.05015E-62 | 1.84653E-61 |
| 4239      | MFAP4    | -3.38641087 | 6.696340123 | 5.65407E-71 | 1.17703E-69 |
| 199675    | MCEMP1   | -3.38253319 | 3.868463103 | 9.05059E-61 | 1.16373E-59 |
| 220963    | SLC16A9  | -3.3820268  | 5.90554662  | 1.53123E-79 | 3.91936E-78 |
| 54103     | GSAP     | -3.37386466 | 3.16017573  | 2.34329E-52 | 4.47804E-51 |
| 6932      | TCF7     | -3.37357902 | 3.527198131 | 2.5456E-62  | 4.45043E-61 |
| 79856     | SNX22    | -3.36844735 | 2.345963052 | 1.57225E-55 | 3.24152E-54 |
| 4818      | NKG7     | -3.36807867 | 2.819191799 | 7.39261E-49 | 9.40541E-48 |
| 699       | BUB1     | -3.36651878 | 1.388619554 | 3.85203E-33 | 5.00106E-32 |
| 4778      | NFE2     | -3.36017161 | 2.79064008  | 3.36095E-58 | 5.32732E-57 |
| 10811     | NOXA1    | -3.35863799 | 2.074700374 | 1.23781E-48 | 1.56571E-47 |
| 401258    | RAB44    | -3.35822233 | 3.245483038 | 7.72584E-59 | 1.23873E-57 |
| 7161      | TP73     | -3.35797828 | 2.591462814 | 4.471E-55   | 5.68939E-54 |

Supplementary table 1

## Upregulated genes in TBI kidney compared with Sham group

| Entrez ID | SYMBOL   | logFC       | logCPM       | P-Value     | FDR         |
|-----------|----------|-------------|--------------|-------------|-------------|
| 64397     | ZNF106   | 3.03933438  | 10.21114285  | 4.60047E-82 | 1.22894E-80 |
| 23078     | VWA8     | 3.038352515 | 15.59613298  | 3.1274E-63  | 5.55659E-62 |
| 4259      | MGST3    | 3.035842706 | 9.36101097   | 1.29373E-91 | 4.0928E-90  |
| 100130827 | SBK3     | 3.035469847 | 6.569067944  | 4.15171E-65 | 7.68016E-64 |
| 4728      | NDUFS8   | 3.034924971 | 8.071833482  | 2.11702E-59 | 3.41585E-58 |
| 54988     | ACSM5    | 3.034586084 | 2.677313498  | 8.77827E-52 | 1.19334E-50 |
| 2626      | GATA4    | 3.031885265 | 6.343329087  | 6.90396E-61 | 1.16181E-59 |
| 126328    | NDUFA11  | 3.03138821  | 10.13483108  | 2.46065E-91 | 7.73637E-90 |
| 1410      | CRYAB    | 3.028044985 | 11.04401647  | 8.66864E-82 | 2.29164E-80 |
| 5138      | PDE2A    | 3.027672694 | 5.252291487  | 8.69331E-63 | 1.53388E-61 |
| 84071     | ARMC2    | 3.025097994 | 5.439157077  | 1.78721E-56 | 2.72268E-55 |
| 81889     | FAHD1    | 3.025088239 | 5.999098195  | 3.23411E-57 | 5.02208E-56 |
| 7166      | TPH1     | 3.024895203 | 4.180788182  | 2.29221E-49 | 2.94575E-48 |
| 2488      | FSHB     | 3.013830471 | 3.732083607  | 2.13127E-51 | 2.86001E-50 |
| 347404    | LANCL3   | 3.00982337  | 1.757829309  | 1.71229E-35 | 1.58664E-34 |
| 140707    | BRI3BP   | 3.009829638 | 6.754281936  | 1.67759E-54 | 2.41599E-53 |
| 7436      | VLDLR    | 3.005529594 | 7.282186936  | 3.93018E-57 | 6.09677E-56 |
| 2199      | FBLN2    | 3.005082797 | 6.652025972  | 2.53855E-69 | 5.10381E-68 |
| 5274      | SERPINI1 | 3.004505367 | 2.469292378  | 7.16601E-48 | 8.92393E-47 |
| 84940     | CORO6    | 3.004324255 | 1.236503684  | 1.01625E-40 | 1.06944E-39 |
| 89941     | RHOT2    | 3.003982015 | 6.971742216  | 1.47319E-63 | 2.63588E-62 |
| 1632      | ECI1     | 3.002916369 | 7.42086388   | 1.46593E-64 | 2.67296E-63 |
| 4967      | OGDH     | 3.001896528 | 9.5983753785 | 1.9204E-68  | 3.78141E-67 |
| 6390      | SDHB     | 2.996090255 | 10.7731684   | 2.6501E-61  | 4.51433E-60 |
| 26086     | GPSM1    | 2.990260102 | 7.437766167  | 1.77738E-61 | 3.04126E-60 |
| 10975     | UQCRC11  | 2.988285866 | 8.684290393  | 1.21362E-61 | 2.09301E-60 |
| 7277      | TUBA4A   | 2.986892707 | 8.567586431  | 5.23281E-61 | 8.83507E-60 |
| 3481      | IGF2     | 2.982811996 | 6.908328331  | 7.00681E-61 | 1.17782E-59 |
| 53942     | CNTN5    | 2.982340381 | 3.409564679  | 5.06314E-54 | 7.25069E-53 |
| 497190    | CLEC18B  | 2.976398283 | 1.357007723  | 3.53129E-29 | 2.66459E-28 |
| 10989     | IMMT     | 2.975467574 | 8.346084758  | 8.76044E-63 | 1.54394E-61 |
| 146395    | GSGL1    | 2.975197016 | 3.189871132  | 1.09621E-47 | 1.35959E-46 |
| 7058      | THBS2    | 2.972169893 | 1.733310178  | 4.57865E-32 | 6.38041E-31 |
| 8050      | PDHX     | 2.970796019 | 5.419662493  | 6.7037E-63  | 1.18556E-61 |
| 4191      | MDH2     | 2.970361712 | 10.78913136  | 4.18971E-88 | 1.5037E-86  |
| 54902     | TTC19    | 2.962487986 | 3.612665537  | 2.63333E-49 | 3.37278E-48 |
| 389203    | SMIM20   | 2.962192162 | 6.719055377  | 2.5789E-60  | 4.26006E-59 |
| 160492    | LMNTD1   | 2.961551158 | 2.191118734  | 7.09965E-46 | 8.38999E-45 |
| 9481      | SLC25A27 | 2.951549152 | 8.076974258  | 6.40435E-74 | 1.42443E-72 |
| 4902      | NRTN     | 2.94748394  | 4.442091815  | 8.25023E-57 | 1.26952E-55 |
| 197       | AHSG     | 2.939906332 | 4.379198375  | 7.60751E-55 | 1.10707E-53 |
| 514       | ATP5F1E  | 2.939320549 | 10.21545662  | 3.10238E-78 | 7.6706E-77  |
| 349565    | NMNA23   | 2.937442103 | 3.671368928  | 1.12978E-52 | 1.39455E-51 |
| 51016     | EMC9     | 2.936288977 | 6.361500212  | 1.93251E-60 | 3.20616E-59 |
| 7385      | UQCRC2   | 2.934118068 | 10.7431364   | 2.01985E-73 | 4.43437E-72 |
| 51188     | SL18L2   | 2.933700983 | 7.42576539   | 4.05534E-65 | 7.51098E-64 |
| 98        | ACY2P    | 2.932751621 | 7.515454073  | 5.28098E-54 | 7.55557E-53 |
| 54968     | TMEM70   | 2.93208804  | 6.812950759  | 2.70412E-48 | 3.40074E-47 |
| 783       | CACNB2   | 2.928946525 | 4.272172197  | 5.50601E-51 | 7.31581E-50 |
| 10901     | DHRS4    | 2.927024446 | 7.77062895   | 1.57767E-59 | 2.56183E-58 |
| 10939     | AFG3L2   | 2.926776653 | 6.580136574  | 4.31579E-61 | 7.131E-60   |
| 5348      | FXYD1    | 2.925394113 | 9.288847016  | 1.36776E-68 | 2.17068E-67 |
| 152485    | ZNF827   | 2.922645399 | 3.87464641   | 2.28495E-55 | 3.38643E-54 |
| 51725     | FBXO40   | 2.915395327 | 2.122404197  | 2.98384E-45 | 3.45926E-44 |
| 2676      | GFRA3    | 2.915329919 | 1.89279955   | 7.92786E-42 | 8.54285E-41 |
| 9556      | ATP5MJ   | 2.912799804 | 10.80399261  | 1.66134E-74 | 3.74966E-73 |
| 4716      | NDUFB10  | 2.911827766 | 9.420676952  | 2.66327E-74 | 5.98452E-73 |
| 5046      | PCSK6    | 2.910392718 | 6.738259066  | 1.68481E-62 | 2.9228E-61  |
| 80308     | FLAD1    | 2.910299065 | 5.688192103  | 7.18282E-58 | 1.13148E-56 |
| 54583     | EGLN1    | 2.909353493 | 6.269603466  | 1.09328E-62 | 1.90155E-61 |
| 4700      | NDUFA6   | 2.907980229 | 10.36550861  | 4.60095E-73 | 1.00146E-71 |
| 1329      | COX5B    | 2.90583538  | 5.369986086  | 4.89199E-61 | 8.26877E-60 |
| 9331      | B4GALT6  | 2.904603213 | 4.054074723  | 4.76232E-52 | 6.52629E-51 |
| 23568     | ARL2BP   | 2.902473734 | 1.023158651  | 6.03013E-26 | 4.12446E-25 |
| 125972    | CALR3    | 2.897262268 | 5.279302688  | 2.59987E-56 | 3.94107E-55 |
| 149086    | LDRC1    | 2.894204646 | 4.666515393  | 2.62044E-30 | 2.06287E-29 |
| 1012      | CDH13    | 2.892805227 | 7.35530356   | 3.655E-60   | 6.02463E-59 |
| 23108     | RAP1GAP2 | 2.892663295 | 7.168054899  | 1.41188E-57 | 2.21041E-56 |
| 6271      | S100A1   | 2.891484296 | 9.940359687  | 2.35359E-83 | 3.6764E-82  |
| 123283    | TARS3    | 2.891230499 | 5.044879725  | 5.08533E-60 | 8.37325E-59 |
| 84925     | SLC49A4  | 2.890811204 | 4.256931272  | 1.06117E-53 | 1.50694E-52 |
| 25874     | MPC2     | 2.88959425  | 4.151772371  | 1.00451E-58 | 1.60553E-57 |
| 4355      | MPP2     | 2.889416531 | 5.088340146  | 3.37755E-65 | 6.27083E-64 |
| 284439    | SLC25A42 | 2.888482285 | 3.520145862  | 7.51665E-49 | 9.54734E-48 |
| 6648      | SOD2     | 2.886692915 | 10.37296847  | 1.0862E-68  | 2.15547E-67 |
| 5099      | PCDH7    | 2.885667059 | 3.345053065  | 1.55914E-46 | 1.8744E-45  |
| 3305      | HSPA1L   | 2.884730954 | 4.65886869   | 9.35888E-61 | 1.56631E-59 |
| 197257    | LDHD     | 2.883841303 | 3.781300345  | 2.31647E-53 | 3.26227E-52 |
| 1743      | DLST     | 2.880296068 | 2.02086394   | 3.43105E-71 | 7.19155E-70 |
| 55276     | PGM2     | 2.878755293 | 8.675655988  | 1.56453E-67 | 3.02991E-66 |
| 1829      | DSG2     | 2.878027829 | 6.226473591  | 8.33055E-47 | 1.00944E-45 |
| 4697      | NDUFA4   | 2.877946054 | 11.10759568  | 1.3871E-68  | 2.74545E-67 |
| 3781      | KCNN2    | 2.875799791 | 4.006936161  | 1.54741E-54 | 2.23271E-53 |
| 6837      | MED22    | 2.875618036 | 1.9885551    | 1.2929E-40  | 1.35489E-39 |
| 3741      | KCNAB5   | 2.871613915 | 0.920882635  | 2.04779E-32 | 1.72303E-31 |
| 84869     | CBRA     | 2.871041687 | 7.668547849  | 1.39467E-61 | 2.39445E-60 |
| 9531      | BAG3     | 2.869754545 | 7.98473603   | 5.04143E-66 | 9.55746E-65 |
| 148811    | PM20D1   | 2.862929266 | 4.13931054   | 1.28533E-53 | 1.8185E-52  |
| 51660     | MPC1     | 2.861822666 | 9.66678727   | 3.60989E-70 | 7.38409E-69 |
| 1240      | CMKLR1   | 2.859069503 | 3.846675645  | 3.66756E-52 | 5.04868E-51 |
| 25813     | SAMM50   | 2.858118443 | 10.07558202  | 1.07668E-77 | 2.62387E-76 |
| 4712      | NDUF86   | 2.855647444 | 8.865715211  | 4.72775E-57 | 7.31915E-56 |
| 23590     | PDS51    | 2.854950198 | 4.550155055  | 1.82526E-36 | 1.73445E-35 |
| 116729    | PPP1R27  | 2.850464115 | 4.167231894  | 4.67831E-55 | 6.85375E-54 |
| 55366     | LGR4     | 2.850042481 | 5.310028092  | 1.22285E-59 | 1.99202E-58 |
| 152926    | PPM1K    | 2.846386177 | 7.369405398  | 3.06422E-57 | 4.7631E-56  |

## Downregulated genes in TBI kidney compared with Sham group

| Entrez ID | SYMBOL   | logFC       | logCPM      | P-Value     | FDR          |
|-----------|----------|-------------|-------------|-------------|--------------|
| 55796     | MBNL3    | -3.35606864 | 4.008108105 | 3.92397E-70 | 8.0158E-69   |
| 161198    | CLEC14A  | -3.34688688 | 6.361976616 | 8.78637E-67 | 1.68663E-65  |
| 57728     | WDR19    | -3.3399421  | 4.38481891  | 4.30248E-64 | 7.73434E-63  |
| 166824    | RASSF6   | -3.33635398 | 3.508393681 | 4.37493E-51 | 5.83833E-50  |
| 390205    | LRRIC10B | -3.3352692  | 2.277289899 | 4.63592E-43 | 5.16303E-42  |
| 7476      | WNIT7A   | -3.330946   | 2.955711628 | 6.96064E-52 | 9.47937E-51  |
| 55604     | CARMIL1  | -3.32403148 | 4.340313949 | 1.05986E-60 | 1.76991E-59  |
| 23541     | SEC14L2  | -3.32103935 | 4.509970278 | 6.34396E-72 | 1.35196E-70  |
| 23624     | CBLC     | -3.32073603 | 2.589817371 | 5.23898E-50 | 6.84202E-49  |
| 283726    | SAXO2    | -3.31895933 | 3.39305372  | 6.6501E-60  | 1.09262E-58  |
| 1080      | CFTR     | -3.31722703 | 2.615543847 | 7.35131E-55 | 1.07081E-53  |
| 80736     | SLC44A4  | -3.31339502 | 5.754281477 | 1.18572E-73 | 2.62576E-72  |
| 4058      | LTK      | -3.30941116 | 2.247854256 | 2.16646E-52 | 2.9985E-51   |
| 84824     | FCRLA    | -3.30517819 | 0.97609604  | 6.78615E-35 | 6.17952E-34  |
| 3664      | IRF6     | -3.30259507 | 5.248987285 | 1.19678E-69 | 2.4189E-68   |
| 57152     | SLURP1   | -3.302539   | 2.953233015 | 3.36051E-49 | 4.29336E-48  |
| 5002      | SLC22A18 | -3.3008745  | 4.075069413 | 5.26603E-63 | 9.34552E-62  |
| 10371     | SEMA3A   | -3.30047125 | 3.886397933 | 2.59218E-65 | 4.8303E-64   |
| 55536     | CDCA7L   | -3.28594878 | 3.571208024 | 1.07932E-58 | 1.72151E-57  |
| 5881      | RAC3     | -3.28325527 | 5.008800884 | 3.56821E-78 | 8.7939E-77   |
| 201294    | UNC13D   | -3.28019484 | 3.741739377 | 8.8089E-46  | 9.84319E-45  |
| 489       | ATP2A3   | -3.27821312 | 6.663770845 | 5.64776E-74 | 1.25982E-72  |
| 6319      | SCD      | -3.27476606 | 8.511701246 | 1.83659E-75 | 4.22637E-74  |
| 3214      | HOXB4    | -3.27456623 | 2.776927915 | 1.59358E-51 | 2.15105E-50  |
| 130752    | MDH18    | -3.27026104 | 3.557066176 | 4.36083E-25 | 2.88957E-24  |
| 796       | CALCA    | -3.26814831 | 1.313921811 | 9.55999E-36 | 8.92344E-35  |
| 146279    | TEKT5    | -3.26521481 | 0.882575941 | 1.51996E-38 | 1.51699E-37  |
| 64116     | SLC39A8  | -3.26016533 | 3.918398489 | 1.36266E-56 | 2.08214E-55  |
| 5733      | PTGER3   | -3.25629569 | -0.08263016 | 1.31297E-27 | 9.37488E-27  |
| 22891     | ZNF365   | -3.24900638 | 3.664611387 | 1.29259E-58 | 2.05952E-57  |
| 79679     | VTCN1    | -3.24641695 | 3.019110284 | 1.88734E-40 | 1.9685E-39   |
| 389816    | LRRIC26  | -3.23698354 | 4.928126996 | 9.59747E-78 | 2.34639E-76  |
| 149428    | BNIP1    | -3.23628048 | 2.885013457 | 7.49566E-46 | 8.83066E-45  |
| 54502     | RBM47    | -3.23536189 | 4.831210417 | 9.59844E-29 | 7.09589E-28  |
| 55630     | SLC39A4  | -3.23007458 | 7.811386572 | 1.92597E-75 | 4.41874E-74  |
| 55130     | ODAD2    | -3.22682481 | 2.389421243 | 2.33767E-11 | 8.15516E-11  |
| 2277      | VEGFD    | -3.22666888 | 4.18098885  | 5.17307E-68 | 1.00951E-66  |
| 120425    | JAML     | -3.21213256 | 1.192811545 | 5.4237E-37  | 5.22536E-36  |
| 85016     | CFAP300  | -3.20393519 | 3.680026109 | 8.80886E-63 | 1.55068E-61  |
| 51599     | LSR      | -3.20321241 | 2.690406165 | 6.32514E-37 | 6.07468E-36  |
| 1890      | TYMP     | -3.19374548 | 1.11774568  | 3.46803E-34 | 3.08269E-33  |
| 10217     | CTDSP1   | -3.19105055 | 6.391314086 | 1.01662E-45 | 1.19308E-44  |
| 161253    | REM2     | -3.18864842 | 1.394358747 | 4.83898E-38 | 4.761109E-37 |
| 2150      | F2RL1    | -3.18840663 | 3.378040583 | 4.78593E-58 | 7.55465E-57  |
| 5590      | PRKCZ    | -3.18667134 | 4.198784555 | 3.08514E-64 | 5.58542E-63  |
| 8877      | SPHK1    | -3.18539781 | 5.391508535 | 1.34859E-65 | 2.544E-64    |
| 760       | CA2      | -3.17621194 | 5.418024594 | 8.9205E-57  | 1.37935E-55  |
| 84612     | PARDB6   | -3.17479352 | 5.831147722 | 6.84953E-58 | 1.93972E-56  |
| 11095     | ADAMTS8  | -3.17359475 | 4.190178899 | 5.89409E-57 | 1.05634E-56  |
| 145376    | PP1R36   | -3.17249281 | 4.153644228 | 3.4259E-64  | 6.18038E-63  |
| 8190      | MIA      | -3.17097497 | 3.331550508 | 7.81633E-53 | 1.09171E-51  |
| 222256    | CDHR3    | -3.16993661 | 6.68975809  | 7.92464E-66 | 1.49862E-64  |
| 3215      | HOXB5    | -3.16931841 | 4.518640546 | 2.52966E-67 | 4.88624E-66  |
| 3700      | ITIH4    | -3.15870346 | 3.608012679 | 7.44137E-46 | 8.77967E-45  |
| 27336     | HTATSF1  | -3.15031522 | 0.858926223 | 2.12105E-36 | 2.01302E-35  |
| 83648     | FAM167A  | -3.14620934 | 3.624880829 | 6.55881E-60 | 1.07878E-58  |
| 10056658  | OCLN     | -3.14598103 | 2.619774424 | 3.40535E-47 | 4.1627E-46   |
| 3422      | IDN1     | -3.14542902 | 5.429510409 | 2.49801E-66 | 4.75929E-65  |
| 26011     | TENM4    | -3.14281455 | 2.490459855 | 7.46267E-49 | 9.48666E-48  |
| 343       | AQP8     | -3.14218156 | 5.169706963 | 1.22305E-61 | 2.10666E-60  |
| 285755    | PP1L6    | -3.13316036 | 4.553707235 | 2.22968E-65 | 2.59676E-64  |
| 89944     | GLB1L2   | -3.12510448 | 5.804716257 | 4.98692E-67 | 9.62124E-66  |
| 64147     | KIF9     | -3.12125131 | 1.805299081 | 1.55431E-41 | 1.66316E-40  |
| 27156     | RSPH14   | -3.12210115 | 2.826718281 | 2.29614E-52 | 3.72824E-51  |
| 126410    | CYP4F22  | -3.12039188 | 2.009430226 | 3.2441E-45  | 3.85477E-45  |
| 57574     | MARCHF4  | -3.11943925 | 0.549883437 | 6.04916E-31 | 4.85203E-30  |
| 1368      | CPM      | -3.11460111 | 5.588115578 | 2.38726E-63 | 4.24648E-62  |
| 80342     | TRAF3IP3 | -3.11345471 | 2.781328082 | 4.03154E-50 | 5.27865E-49  |
| 55815     | TSNAXIP1 | -3.1180726  | 4.941148251 | 1.7663E-68  | 3.48245E-67  |
| 1238      | ACKR2    | -3.11106536 | 5.830461934 | 6.91048E-63 | 1.22072E-61  |
| 100130519 | TNMEM221 | -3.11003648 | 2.687162472 | 3.26833E-47 | 3.99841E-46  |
| 3949      | LDLR     | -3.1099805  | 7.558529208 | 7.69457E-70 | 1.56139E-68  |
| 401409    | RAB19    | -3.10380416 | 2.173406932 | 6.64414E-46 | 8.99172E-45  |
| 3575      | IL7R     | -3.10316176 | 3.093473816 | 1.03312E-42 | 1.13569E-41  |
| 57718     | PP4R4    | -3.10197669 | 2.8629214   | 2.02414E-52 | 2.80661E-51  |
| 388394    | RPRML    | -3.10096344 | 1.616934291 | 8.58778E-41 | 9.04351E-40  |
| 54848     | ARHGFE38 | -3.09501971 | 1.731115445 | 1.34267E-42 | 1.47174E-41  |
| 29841     | GRHL1    | -3.08925039 | 7.289897966 | 1.9891E-48  | 2.5077E-47   |
| 222223    | ELAPOR2  | -3.08288301 | 0.765615846 | 9.62512E-31 | 7.66798E-30  |
| 155       | ADRB3    | -3.08286338 | 3.36531038  | 3.16583E-62 | 5.52214E-61  |
| 9052      | GPRC5A   | -3.07937706 | 6.599360777 | 8.87478E-36 | 8.29398E-35  |
| 3055      | HCK      | -3.07837178 | 5.42839398  | 8.8337E-47  | 4.68257E-46  |
| 5732      | PTGER2   | -3.07777816 | 1.856627172 | 4.92487E-24 | 3.14599E-23  |
| 92714     | ARRDC1   | -3.07406672 | 2.792024868 | 3.58166E-49 | 4.50207E-48  |
| 286676    | ILDR1    | -3.07248076 | 2.344572187 | 1.24081E-49 | 1.60811E-48  |
| 1441      | CSF3R    | -3.06754243 | 3.728899057 | 5.44861E-48 | 6.80186E-47  |
| 92521     | SPCC1    | -3.06654092 | 3.170208233 | 2.06615E-56 | 3.14137E-55  |
| 1303      | COL12A1  | -3.06501756 | 4.549081868 | 2.18125E-56 | 3.31306E-55  |
| 147700    | KLC3     | -3.06298518 | 3.083508358 | 4.74949E-43 | 5.28182E-42  |
| 3695      | ITGB7    | -3.04999533 | 3.698691994 | 2.20528E-56 | 4.39558E-55  |
| 80774     | LIMD2    | -3.04889798 | 2.373116631 | 1.38431E-47 | 1.71274E-46  |
| 29909     | GPRI71   | -3.04520522 | 1.345098449 | 7.77198E-35 | 7.06039E-34  |
| 7294      | TXK      | -3.04312909 | 2.03574351  | 3.08629E-42 | 3.34694E-41  |
| 283897    | C16orf54 | -3.04175873 | 5.872541521 | 9.10543E-62 | 1.57388E-60  |
| 6820      | SULT2B1  | -3.03845184 | 1.168657556 | 1.01532E-31 | 8.33197E-31  |
| 8537      | BACSA1   | -3.037853   | 4.209818758 | 1.48443E-59 | 2.41283E-58  |

Supplementary table 1

## Upregulated genes in TBI kidney compared with Sham group

| Entrez ID | SYMBOL   | logFC       | logCPM      | P-Value     | FDR          |
|-----------|----------|-------------|-------------|-------------|--------------|
| 58476     | TP53INP2 | 2.846223091 | 9.640246125 | 5.11162E-71 | 1.06556E-69  |
| 8802      | SUGLG1   | 2.844614595 | 9.69139287  | 2.7133E-76  | 6.42778E-75  |
| 54751     | FBIM1    | 2.842550092 | 8.097772262 | 6.75522E-55 | 9.84922E-55  |
| 157378    | TMEM65   | 2.841108065 | 6.024919026 | 6.94387E-57 | 1.07066E-55  |
| 10721     | POLQ     | 2.838723163 | 1.944856802 | 1.65401E-40 | 1.72868E-39  |
| 3712      | IVD      | 2.83684254  | 8.243909501 | 1.66961E-60 | 2.77603E-59  |
| 59352     | LGR6     | 2.83630106  | 3.837515914 | 8.85195E-49 | 1.12337E-47  |
| 7167      | TP11     | 2.829773784 | 10.46668259 | 1.27813E-69 | 2.57991E-68  |
| 9532      | BAG2     | 2.829542074 | 5.904891169 | 1.70345E-54 | 2.45091E-53  |
| 8402      | SLC25A11 | 2.827343683 | 9.898616085 | 1.59637E-65 | 3.00771E-64  |
| 23022     | PALLD    | 2.827165936 | 6.468285323 | 2.46344E-55 | 3.64389E-54  |
| 145482    | TGTR2    | 2.826332209 | 5.96771819  | 1.73837E-55 | 2.58639E-54  |
| 3752      | KCND3    | 2.822447666 | 2.653096243 | 3.39162E-44 | 3.8445E-43   |
| 23408     | SIRT5    | 2.818985983 | 6.695777151 | 1.88885E-62 | 3.30602E-61  |
| 340359    | KLHL38   | 2.818525376 | 4.809424952 | 8.10484E-53 | 1.13098E-51  |
| 339855    | KY       | 2.816460457 | 5.664218477 | 9.59803E-55 | 1.39276E-53  |
| 405753    | DUOX2    | 2.816336803 | 1.682448564 | 1.18888E-18 | 6.05938E-18  |
| 2287      | FKBP3    | 2.813958666 | 8.417927271 | 3.65269E-61 | 6.19458E-60  |
| 80724     | ACAD10   | 2.813286242 | 4.876657581 | 4.07159E-57 | 6.30972E-56  |
| 56261     | GPCPD1   | 2.812814729 | 7.17750095  | 9.04627E-55 | 1.31395E-53  |
| 389400    | GFRAL    | 2.808872876 | 4.373883867 | 1.7572E-41  | 1.87763E-40  |
| 8912      | CACNA1H  | 2.807473092 | 5.064409455 | 9.64902E-60 | 1.57687E-58  |
| 219409    | GSX1     | 2.807250068 | 4.758577442 | 9.04659E-56 | 1.35521E-54  |
| 5507      | PPP1R3C  | 2.805499704 | 8.28965619  | 9.79667E-60 | 1.59928E-58  |
| 139065    | SLITRK4  | 2.801160147 | 1.467164735 | 1.44429E-34 | 1.29816E-33  |
| 56942     | CMC2     | 2.797467467 | 7.551819156 | 5.44121E-56 | 8.19938E-55  |
| 8913      | CACNA1G  | 2.794086324 | 3.619137403 | 2.81279E-47 | 3.45771E-46  |
| 64208     | POPD3    | 2.791193422 | 4.666776201 | 1.77662E-49 | 2.29086E-48  |
| 285659    | OR2V2    | 2.789705189 | 3.234948926 | 6.68767E-27 | 4.7091E-26   |
| 84864     | RIOX2    | 2.789359677 | 9.712206399 | 1.73398E-71 | 3.65452E-70  |
| 414919    | C8orf82  | 2.787876259 | 6.649595229 | 3.915E-59   | 6.31026E-58  |
| 1950      | EGF      | 2.787007042 | 3.614355304 | 1.01678E-46 | 1.22721E-45  |
| 7284      | TUFM     | 2.785653414 | 4.471912012 | 9.28123E-49 | 1.17593E-47  |
| 143496    | OR52B4   | 2.784653662 | 4.752678939 | 2.09897E-60 | 3.47479E-59  |
| 26999     | CYFIP2   | 2.779848905 | 6.738432145 | 1.38456E-58 | 2.20376E-57  |
| 5188      | GATB     | 2.779369404 | 5.190817549 | 7.07356E-58 | 1.11542E-56  |
| 10449     | ACAA2    | 2.771771539 | 10.90804053 | 2.24635E-73 | 4.92457E-72  |
| 3745      | KCNB1    | 2.770705379 | 4.927101494 | 3.19091E-60 | 5.26535E-59  |
| 11344     | TWF2     | 2.768348773 | 7.811096584 | 8.27451E-60 | 1.35369E-58  |
| 5207      | PFKFB1   | 2.767485214 | 4.786607463 | 2.44189E-42 | 2.66325E-41  |
| 4184      | SMCP     | 2.767261891 | 3.511776349 | 2.48648E-49 | 3.18736E-48  |
| 26519     | TIMM10   | 2.765890159 | 7.981078234 | 1.84512E-65 | 3.45932E-64  |
| 55178     | MRM3     | 2.763752724 | 5.075104836 | 1.38046E-55 | 2.205789E-54 |
| 9211      | LG11     | 2.762461654 | 2.511836662 | 4.52545E-39 | 4.59767E-38  |
| 29103     | DNAJC15  | 2.761795425 | 8.737677211 | 1.7775E-57  | 2.77711E-56  |
| 75158     | JPH2     | 2.761615236 | 2.813173821 | 1.74796E-44 | 1.98874E-43  |
| 1073      | CFL2     | 2.759513178 | 1.983610918 | 1.96168E-76 | 4.66892E-75  |
| 2645      | GCK      | 2.757820453 | 4.001534709 | 9.59864E-49 | 1.21514E-47  |
| 57631     | LRCH2    | 2.75685753  | 4.085230724 | 1.24349E-50 | 1.64506E-49  |
| 10965     | ACOT2    | 2.753530568 | 7.291973058 | 1.39006E-53 | 1.96486E-52  |
| 118461    | C10orf71 | 2.752484325 | 3.491550727 | 1.4003E-47  | 1.73111E-46  |
| 55437     | STRADB   | 2.744735235 | 6.692598044 | 9.94475E-55 | 1.44171E-53  |
| 140767    | NRSN1    | 2.744451839 | 4.315122247 | 1.30554E-54 | 1.8873E-53   |
| 84557     | MAP1LC3A | 2.743366503 | 9.536359603 | 1.57973E-68 | 3.11864E-67  |
| 4713      | NDUFB7   | 2.740075421 | 10.13533406 | 9.43383E-68 | 1.8293E-66   |
| 84866     | TMEM25   | 2.738616485 | 4.901414364 | 1.91668E-47 | 2.35994E-46  |
| 118672    | PSTK     | 2.737372888 | 5.241618036 | 1.90355E-51 | 2.56041E-50  |
| 6391      | SDHC     | 2.732724185 | 4.972252641 | 2.75441E-64 | 4.99257E-63  |
| 6443      | SGCB     | 2.732420793 | 6.030865172 | 2.00564E-51 | 2.69536E-50  |
| 3149      | HMGCB3   | 2.731316935 | 6.690931672 | 3.64699E-53 | 5.13131E-52  |
| 4696      | NDUFA3   | 2.728088536 | 10.02760979 | 4.12628E-76 | 9.1488E-75   |
| 60488     | MRPS35   | 2.720962936 | 7.544262396 | 7.51449E-43 | 8.2784E-42   |
| 147       | ADRA1B   | 2.720257896 | 1.663012261 | 2.99006E-35 | 2.75395E-34  |
| 55062     | WIP1     | 2.719506749 | 7.747115719 | 2.35195E-49 | 3.01998E-48  |
| 183       | AGT      | 2.718542224 | 3.15918189  | 8.44343E-32 | 6.94379E-31  |
| 6389      | SDHA     | 2.714380521 | 9.90941967  | 9.50074E-61 | 1.58831E-59  |
| 23277     | CLUH     | 2.71096512  | 8.515836083 | 3.48855E-58 | 5.52384E-57  |
| 6709      | SPTAN1   | 2.71087366  | 3.445893396 | 4.48892E-47 | 5.46104E-46  |
| 219       | ALDH1B1  | 2.710041055 | 4.693130967 | 1.14783E-41 | 1.23166E-40  |
| 56267     | KYAT3    | 2.707176907 | 4.650049858 | 4.99218E-51 | 6.65044E-50  |
| 23175     | LPIN1    | 2.706901696 | 6.447569597 | 4.56993E-39 | 4.63977E-38  |
| 57571     | CARNS1   | 2.703352714 | 4.47621293  | 7.31653E-49 | 9.31639E-48  |
| 449520    | GGNBP1   | 2.69739374  | 4.543291494 | 1.30403E-51 | 1.76489E-50  |
| 3359      | HTR3A    | 2.69466265  | 1.713557105 | 8.60254E-32 | 7.07083E-31  |
| 1738      | DLD      | 2.68856982  | 7.860247895 | 4.71679E-50 | 6.16532E-49  |
| 26353     | HSPB8    | 2.688229537 | 10.0098139  | 2.2238E-63  | 3.96496E-62  |
| 7138      | TNNT1    | 2.685034345 | 5.141030776 | 1.84405E-59 | 2.98803E-58  |
| 51250     | MTRR51   | 2.678348556 | 7.457111322 | 4.71121E-55 | 6.89533E-54  |
| 171389    | NRP6     | 2.675671404 | 5.053928154 | 3.74483E-50 | 4.91168E-49  |
| 51004     | COQ6     | 2.675119836 | 7.415471144 | 1.37116E-52 | 1.9064E-51   |
| 79810     | PTCD2    | 2.672062053 | 7.503251779 | 1.69083E-51 | 2.2783E-50   |
| 153328    | SLC25A48 | 2.670626349 | 1.866771246 | 2.33646E-23 | 1.45126E-22  |
| 2997      | GRY5     | 2.665961398 | 7.927380801 | 9.11621E-56 | 1.36431E-54  |
| 81466     | OR2L5    | 2.663439382 | 5.513605201 | 7.3126E-50  | 9.50141E-49  |
| 29074     | MRPL18   | 2.656869488 | 8.612458524 | 3.71211E-64 | 6.6888E-63   |
| 22843     | PPM1E    | 2.656803512 | 3.273157267 | 2.36552E-41 | 2.52234E-40  |
| 56936     | CCDC177  | 2.655435402 | 4.406012724 | 1.26384E-50 | 1.67055E-49  |
| 51161     | C3orf18  | 2.653189819 | 3.853223323 | 3.8196E-41  | 4.05584E-40  |
| 574436    | MIR485   | 2.648877178 | 2.441595025 | 3.11357E-40 | 3.23202E-39  |
| 342035    | GILDN    | 2.647638528 | 4.467016384 | 6.9951E-20  | 3.77678E-19  |
| 128486    | ITIM2    | 2.644322834 | 4.079163633 | 5.62888E-47 | 6.84243E-46  |
| 55245     | UQC1     | 2.643771409 | 5.866596875 | 2.25115E-49 | 2.89542E-48  |
| 84532     | ACSS1    | 2.64311995  | 9.486162894 | 1.40233E-61 | 2.40489E-60  |
| 54943     | DNAJC28  | 2.643081163 | 5.89671436  | 1.49635E-46 | 1.80034E-45  |
| 6640      | SNTA1    | 2.639014366 | 6.963652465 | 2.09092E-17 | 1.01137E-16  |
| 51078     | THAP4    | 2.638890703 | 7.02548616  | 2.90905E-46 | 3.45917E-45  |

## Downregulated genes in TBI kidney compared with Sham group

| Entrez ID | SYMBOL   | logFC       | logCPM      | P-Value     | FDR         |
|-----------|----------|-------------|-------------|-------------|-------------|
| 8843      | HCAR3    | -3.03720262 | 0.726959974 | 1.4855E-28  | 1.09022E-27 |
| 269       | AMHR2    | -3.03686629 | 2.176336449 | 1.06732E-42 | 1.17244E-41 |
| 1286      | COL4A4   | -3.03658436 | 1.248962715 | 1.07933E-36 | 1.03012E-35 |
| 5074      | PAWR     | -3.03575986 | 4.962178722 | 5.52908E-65 | 1.01788E-63 |
| 5013      | OTX1     | -3.02091446 | 1.815057398 | 1.25476E-39 | 1.2859E-38  |
| 10203     | CALCR1   | -3.01877874 | 9.318142916 | 4.62334E-80 | 1.19534E-78 |
| 113278    | SLC52A3  | -3.01751695 | 5.159529096 | 1.51316E-66 | 2.89375E-65 |
| 387496    | RASL11A  | -3.01603806 | 4.759010032 | 4.37006E-59 | 7.02889E-58 |
| 2841      | GPR18    | -3.00996555 | 2.396657843 | 1.22342E-47 | 1.51613E-46 |
| 51088     | KLHL5    | -3.00832457 | 7.130156016 | 5.79307E-54 | 8.28046E-53 |
| 2261      | FGFR3    | -3.00470171 | 6.707546744 | 7.62177E-59 | 1.22333E-57 |
| 2264      | FGFR4    | -3.00181874 | 4.27523121  | 9.56719E-62 | 1.65183E-60 |
| 6813      | STXB2    | -3.00008586 | 6.896596824 | 3.37777E-51 | 4.51552E-50 |
| 7262      | PHLDA2   | -2.99906718 | 3.593980991 | 2.34341E-48 | 2.95197E-47 |
| 2139      | EYA2     | -2.97422008 | 3.667821901 | 4.8667E-54  | 6.97591E-53 |
| 341799    | OR6S1    | -2.97030603 | -0.48700969 | 2.60958E-19 | 1.37026E-18 |
| 90865     | IL33     | -2.96880264 | 6.029458493 | 4.97172E-52 | 6.80106E-51 |
| 11010     | GLIPR1   | -2.96822633 | 5.538612166 | 4.37656E-54 | 5.67293E-53 |
| 6646      | SOAT1    | -2.96604136 | 2.468333709 | 4.36716E-46 | 5.17289E-45 |
| 474354    | LRRIC18  | -2.9633225  | 2.721919816 | 4.06308E-38 | 4.01317E-37 |
| 967       | CD63     | -2.96242653 | 0.520947475 | 1.44125E-30 | 1.14164E-29 |
| 59271     | EVA1C    | -2.96061151 | 2.712054818 | 1.90393E-47 | 2.34614E-46 |
| 10125     | RASGRP1  | -2.95482514 | 2.877914197 | 3.31084E-42 | 3.58792E-41 |
| 9021      | SOC3S    | -2.9528745  | 5.689601628 | 7.82742E-56 | 1.17488E-54 |
| 57578     | UNC79    | -2.94241191 | 2.227799595 | 4.28331E-33 | 3.66661E-32 |
| 345930    | ECT2L    | -2.94097156 | 1.769360828 | 3.06899E-36 | 2.90007E-35 |
| 9943      | OXSRI    | -2.94032225 | 0.72880535  | 9.7782E-30  | 7.49302E-29 |
| 53828     | FXYD4    | -2.93651712 | 1.838699176 | 7.86304E-37 | 7.53746E-36 |
| 388701    | CFAP141  | -2.93607389 | 5.989679886 | 3.8102E-53  | 5.35601E-52 |
| 127254    | ERIC3    | -2.93501983 | 1.409789294 | 6.39827E-36 | 6.00157E-35 |
| 158158    | RASEF    | -2.93425193 | 2.539960748 | 3.59654E-29 | 2.71249E-28 |
| 642987    | TMEM232  | -2.93339349 | 3.201704798 | 3.44808E-34 | 3.06674E-33 |
| 647024    | C6orf132 | -2.93221458 | 1.510932987 | 4.43669E-35 | 4.05944E-34 |
| 3579      | CXCR2    | -2.93091532 | 0.365113095 | 2.05352E-28 | 1.50133E-27 |
| 115908    | CTHRC1   | -2.92791528 | 2.649941772 | 3.44771E-44 | 3.90519E-43 |
| 80125     | CCDC33   | -2.92596351 | 2.256854556 | 7.23894E-29 | 5.38515E-28 |
| 84868     | HAVCR2   | -2.92500067 | 2.060077313 | 7.1649E-43  | 7.90467E-42 |
| 9957      | HS3ST1   | -2.92449557 | 6.076966217 | 3.20321E-62 | 5.58097E-61 |
| 84433     | CARD11   | -2.9222635  | 2.51096698  | 1.88647E-40 | 1.9685E-39  |
| 1040      | CDS1     | -2.92114586 | 5.040869209 | 4.4862E-53  | 6.30047E-52 |
| 10160     | FARP1    | -2.91679331 | 4.884249038 | 1.72364E-64 | 3.19312E-63 |
| 7852      | CXCR4    | -2.91665328 | 3.12698427  | 6.97643E-41 | 7.36696E-40 |
| 127003    | CFAP276  | -2.91476922 | 3.723006987 | 8.34355E-48 | 4.81389E-47 |
| 23046     | KIF21B   | -2.91366385 | 3.886709677 | 3.37406E-35 | 4.96683E-34 |
| 4586      | MUC5AC   | -2.91289433 | 8.076264291 | 5.57045E-32 | 4.61586E-31 |
| 344148    | NCKAP5   | -2.90974571 | 4.720570836 | 1.21275E-52 | 1.68768E-51 |
| 91544     | UBXN11   | -2.90763002 | 3.86899731  | 5.2047E-46  | 6.1554E-45  |
| 6367      | CLL2     | -2.90527722 | 2.764657585 | 2.08749E-45 | 2.43488E-44 |
| 164781    | DAW1     | -2.90416118 | 1.06969248  | 1.01773E-33 | 8.92192E-33 |
| 219670    | ENKUR    | -2.90029722 | 4.234159365 | 1.56877E-54 | 2.26139E-53 |
| 9076      | CLDN1    | -2.89866378 | 3.650719616 | 5.09365E-53 | 7.14045E-52 |
| 1675      | CFD      | -2.89854984 | 7.139650111 | 2.8403E-61  | 4.83294E-60 |
| 3706      | ITPKA    | -2.89658758 | 5.341326388 | 6.94849E-47 | 8.42642E-46 |
| 6578      | SLCO2A1  | -2.89491564 | 3.578474443 | 4.00606E-62 | 6.95598E-61 |
| 389434    | IYD      | -2.89301347 | 4.42480409  | 4.01234E-47 | 4.89295E-46 |
| 53842     | CLDN22   | -2.89070129 | 2.104472214 | 3.02552E-40 | 3.14275E-39 |
| 3400      | ID4      | -2.88160255 | 3.170070592 | 3.40386E-45 | 3.93725E-44 |
| 132671    | SPATA18  | -2.87986665 | 2.135814356 | 1.46333E-35 | 1.36091E-34 |
| 400566    | C17orf97 | -2.87549749 | 4.27513056  | 2.6231E-35  | 3.87256E-34 |
| 135932    | TMEM139  | -2.87431899 | 3.678519373 | 2.16827E-42 | 2.36651E-41 |
| 5366      | PMAP1P   | -2.87388735 | 1.599298672 | 1.24898E-30 | 9.90884E-30 |
| 200634    | KRTCAP3  | -2.87104229 | 5.325049515 | 2.40036E-51 | 3.2145E-50  |
| 84329     | HVCN1    | -2.86463724 | 4.366311221 | 4.99927E-56 | 7.54086E-55 |
| 55        | ALP3     | -2.86223326 | 1.493911507 | 1.49931E-34 | 1.34682E-33 |
| 84889     | SLC7A3   | -2.86096466 | 2.877545808 | 7.11516E-44 | 8.03545E-43 |
| 58516     | SINHCAF  | -2.85617928 | 5.048065554 | 2.38243E-45 | 2.17255E-44 |
| 6039      | RNASE6   | -2.85352498 | 3.139688547 | 1.2147E-38  | 1.77097E-37 |
| 65987     | KCTD14   | -2.85098907 | 3.042113755 | 3.97969E-42 | 4.30663E-41 |
| 11190     | CEP250   | -2.85068459 | 3.177588591 | 1.3708E-45  | 1.60382E-44 |
| 8612      | PLPP2    | -2.84760322 | 6.568555591 | 6.59962E-43 | 7.30212E-42 |
| 629       | CFB      | -2.84726903 | 5.746150736 | 2.64337E-55 | 3.89872E-54 |
| 5803      | PTFR     | -2.84498504 | 2.039004874 | 2.70466E-38 | 2.68882E-37 |
| 8581      | LY6D     | -2.84118708 | 4.691760571 | 1.6682E-51  | 2.24979E-50 |
| 153572    | IRX2     | -2.84019611 | 3.588795533 | 5.92195E-52 | 8.08645E-51 |
| 79632     | FAM184A  | -2.83982915 | 3.265111969 | 4.81939E-41 | 5.10681E-40 |
| 5360      | PLTP     | -2.83600486 | 7.231153339 | 2.01033E-58 | 3.19313E-57 |
| 27285     | TEK2     | -2.83225433 | 4.274264343 | 1.01691E-55 | 1.5204E-54  |
| 55329     | MNS1     | -2.82817062 | 4.47363511  | 4.6898E-58  | 7.41022E-57 |
| 93589     | CACNA2D4 | -2.82237641 | 4.084897057 | 1.55976E-27 | 1.1111E-26  |
| 5218      | CDK14    | -2.82155492 | 1.178348003 | 3.86286E-47 | 4.71442E-46 |
| 79192     | IRX1     | -2.81614813 | 6.195056812 | 1.7576E-53  | 2.47979E-52 |
| 84636     | GPR174   | -2.81573628 | 1.046263843 | 8.2351E-32  | 6.77976E-31 |
| 2833      | CXCR3    | -2.80860992 | 1.396430097 | 4.28125E-30 | 3.33592E-29 |
| 2892      | GRIA3    | -2.80526142 | 3.216781611 | 5.0834E-39  | 5.15082E-38 |
| 55930     | MYO5C    | -2.80214875 | 5.657504892 | 3.92442E-56 | 5.931E-55   |
| 5050      | PAFAH1B3 | -2.80056105 | 5.656739373 | 5.93078E-50 | 7.73227E-49 |
| 6382      | SDC1     | -2.80001874 | 4.545839821 | 1.74918E-55 | 2.59995E-54 |
| 83641     | FAM107B  | -2.79969292 | 5.325012604 | 8.30644E-46 | 9.76636E-45 |
| 84168     | ANTXR1   | -2.79754682 | 6.708891321 | 7.05986E-52 | 1.00536E-52 |
| 2940      | GSTA3    | -2.79532017 | 8.615472942 | 2.26232E-65 | 4.22079E-64 |
| 30811     | HUNK     | -2.79411932 | 2.397254357 | 3.84693E-38 | 3.80214E-37 |
| 389658    | ALKAL1   | -2.79244774 | 1.383075749 | 1.15064E-43 | 1.00698E-42 |
| 8492      | PRSS12   | -2.79181822 | 3.534583546 | 3.22792E-47 | 3.95847E-46 |
| 90139     | TSPAN18  | -2.7915803  | 5.062451111 | 1.0261E-58  | 1.68333E-57 |
| 221424    | LRRCT7   | -2.78983634 | 2.347303023 | 1.27174E-31 | 1.04027E-30 |
| 3732      | CD82     | -2.78918754 | 7.15389646  | 1.03469E-55 | 1.50466E-54 |

Supplementary table 1

## Upregulated genes in TBI kidney compared with Sham group

| Entrez ID | SYMBOL    | logFC       | logCPM      | P-Value     | FDR          |
|-----------|-----------|-------------|-------------|-------------|--------------|
| 57570     | TRMT5     | 2.635814984 | 5.637187127 | 2.6488E-49  | 3.38975E-48  |
| 5239      | PGM5      | 2.635549231 | 3.316227186 | 2.38433E-37 | 2.31464E-36  |
| 26056     | RAB11FIP5 | 2.632864958 | 6.814972045 | 1.63983E-47 | 2.02232E-46  |
| 219902    | TLCD5     | 2.629537735 | 4.111979641 | 2.51714E-48 | 3.16819E-47  |
| 100130890 | TSTD3     | 2.628213732 | 3.375394638 | 7.89541E-48 | 9.16266E-47  |
| 8821      | INPP4B    | 2.624211995 | 1.218686435 | 7.96405E-30 | 6.1367E-29   |
| 79145     | CHCHD7    | 2.622251708 | 8.066339906 | 1.37507E-52 | 1.9101E-51   |
| 11162     | NUDT6     | 2.621489877 | 5.696627012 | 8.36773E-44 | 9.43609E-43  |
| 3313      | HSPA9     | 2.619171603 | 9.329852084 | 4.4835E-65  | 8.26391E-64  |
| 7546      | ZIC2      | 2.612731306 | 3.431014887 | 5.86314E-42 | 6.3269E-41   |
| 9717      | SEC14L5   | 2.609274778 | 1.795464465 | 2.78362E-35 | 2.56691E-34  |
| 242       | ALOX12B   | 2.607229104 | 4.013879238 | 2.16217E-46 | 2.58716E-45  |
| 1327      | COX4I1    | 2.604540277 | 10.68253118 | 4.15257E-64 | 7.47365E-63  |
| 84129     | ACAD11    | 2.603278892 | 5.936018719 | 1.4889E-49  | 1.92473E-48  |
| 6920      | TCEA3     | 2.600880965 | 8.000437659 | 7.47082E-60 | 1.22483E-58  |
| 654790    | PCP4L1    | 2.599216481 | 8.5130733   | 9.13087E-52 | 1.24017E-50  |
| 10133     | OPTN      | 2.598605394 | 5.976444268 | 8.66144E-44 | 9.76009E-43  |
| 3033      | HADH      | 2.59730893  | 10.66703071 | 1.46289E-60 | 2.43761E-59  |
| 64094     | SMOC2     | 2.596972328 | 6.889467    | 8.85906E-49 | 1.12337E-47  |
| 10216     | PRG4      | 2.595189974 | 4.534519414 | 6.35858E-47 | 7.7233E-46   |
| 16        | AARS1     | 2.593859839 | 2.474772187 | 1.30297E-12 | 4.88096E-12  |
| 26275     | HIBCH     | 2.592975308 | 6.011067762 | 5.21287E-43 | 5.7845E-42   |
| 51053     | GMNN      | 2.591124336 | 5.517464719 | 1.3445E-40  | 1.40713E-39  |
| 3760      | KCNJ3     | 2.588755695 | 2.071893883 | 1.65789E-35 | 1.53811E-34  |
| 55278     | QRSL1     | 2.584752919 | 6.999779184 | 1.89453E-49 | 2.44008E-48  |
| 1340      | COX6B1    | 2.580615206 | 10.64628056 | 4.10566E-51 | 5.48378E-50  |
| 84034     | EMILIN2   | 2.576361954 | 6.291096062 | 1.44764E-49 | 1.87299E-48  |
| 29765     | TMOD4     | 2.575005096 | 5.634936952 | 3.3238E-45  | 3.84755E-44  |
| 51085     | MLXIPL    | 2.573946234 | 4.933311235 | 3.88819E-50 | 5.09534E-49  |
| 390648    | OR4F6     | 2.57164231  | 1.796652988 | 7.37878E-34 | 6.48803E-33  |
| 2157      | F8        | 2.570849155 | 4.365388424 | 3.1319E-48  | 3.92902E-47  |
| 8291      | DYSF      | 2.569984043 | 5.495094381 | 1.38289E-46 | 1.66513E-45  |
| 29796     | UQCRC10   | 2.568707435 | 10.60312428 | 1.4504E-62  | 2.54455E-61  |
| 147699    | PPM1N     | 2.568532836 | 6.291241475 | 1.26436E-45 | 1.48155E-44  |
| 65018     | PINK1     | 2.563278156 | 8.22620235  | 2.51952E-55 | 3.72323E-54  |
| 9882      | TBC1D4    | 2.561859462 | 6.90169487  | 1.00203E-41 | 1.07749E-40  |
| 744       | MPPED2    | 2.558829023 | 4.878000476 | 1.93244E-44 | 2.197E-43    |
| 4076      | CAPRIN1   | 2.567676578 | 5.257979004 | 4.81651E-46 | 5.70072E-45  |
| 3004      | GZMM      | 2.554142733 | 4.235224744 | 1.58486E-34 | 1.42284E-33  |
| 23198     | PSME4     | 2.552952771 | 7.875212565 | 9.97162E-53 | 1.3902E-51   |
| 26053     | AUTS2     | 2.550902325 | 4.632459752 | 3.89809E-49 | 4.97185E-48  |
| 64641     | EBF2      | 2.548386833 | 4.291379173 | 4.73016E-43 | 5.26415E-42  |
| 29951     | PDZRN4    | 2.546479407 | 0.288058253 | 2.27492E-25 | 1.52862E-24  |
| 2134      | EXTL1     | 2.544993258 | 3.559527495 | 3.30471E-35 | 3.0401E-34   |
| 57001     | SDHAF3    | 2.544950064 | 3.77738776  | 1.53794E-43 | 1.72285E-42  |
| 3792      | KEL       | 2.544717421 | 4.870643543 | 1.03717E-49 | 1.34533E-48  |
| 79736     | TEFM      | 2.54172949  | 6.292120471 | 2.06789E-46 | 2.47628E-45  |
| 25956     | SEC31B    | 2.539024277 | 5.095692372 | 9.77139E-28 | 6.99657E-27  |
| 51365     | PLA1A     | 2.537875307 | 4.844836166 | 1.92633E-50 | 2.54402E-49  |
| 8165      | AKAP1     | 2.535583092 | 5.798543548 | 4.94689E-48 | 6.18563E-47  |
| 8029      | CUBN      | 2.53473058  | 1.116249191 | 4.04122E-29 | 3.20037E-28  |
| 79745     | CLIP4     | 2.529328157 | 3.963775751 | 1.22558E-41 | 1.31417E-40  |
| 81628     | TSC22D4   | 2.527609744 | 0.88089834  | 3.23607E-47 | 3.965529E-46 |
| 2888      | GRB14     | 2.524943729 | 7.745591089 | 3.88159E-41 | 4.1188E-40   |
| 125988    | MICOS13   | 2.523437457 | 8.782176304 | 4.71433E-52 | 6.46633E-51  |
| 2532      | ACKR1     | 2.514008201 | 4.284308934 | 1.19667E-29 | 1.91667E-29  |
| 57710     | KIAA1614  | 2.511872157 | 5.089172434 | 5.08595E-45 | 5.86515E-44  |
| 27244     | SESN1     | 2.509285095 | 8.602428867 | 2.49418E-46 | 2.97976E-45  |
| 5137      | PDE1C     | 2.502186743 | 0.09499527  | 4.94112E-23 | 3.03092E-22  |
| 26167     | PCDH8B5   | 2.499017063 | 3.887582409 | 5.92E-13    | 2.25355E-12  |
| 10063     | COX17     | 2.494353818 | 8.754579594 | 6.12073E-32 | 5.06038E-31  |
| 55037     | PTCD3     | 2.491412664 | 7.15785425  | 1.57908E-44 | 1.79928E-43  |
| 149840    | SHLD1     | 2.489487147 | 6.543351095 | 3.2202E-48  | 4.03648E-47  |
| 390073    | OR56B2P   | 2.487789384 | 1.565348369 | 5.34328E-30 | 4.14443E-29  |
| 1079      | NDUFA13   | 2.481798762 | 11.00138844 | 2.24817E-50 | 2.96138E-49  |
| 18176     | E2F6      | 2.481821257 | 6.464291812 | 2.08314E-39 | 2.13055E-38  |
| 222546    | RFK6      | 2.477997757 | 4.138486474 | 1.23409E-44 | 1.41144E-43  |
| 11112     | HIBADH    | 2.477161164 | 9.029954011 | 6.07409E-50 | 7.91267E-49  |
| 10579     | TACC2     | 2.475417031 | 8.321739163 | 1.28244E-53 | 1.81609E-52  |
| 28981     | IFT81     | 2.473484278 | 7.329743866 | 4.33238E-47 | 5.27901E-46  |
| 10229     | COQ7      | 2.47339279  | 8.193967787 | 2.42455E-49 | 3.11059E-48  |
| 10158     | PDZK1IP1  | 2.471901422 | 4.865450253 | 1.02558E-17 | 5.02272E-17  |
| 79791     | FBXO31    | 2.470944326 | 7.003012448 | 1.82912E-46 | 2.19379E-45  |
| 54948     | MRPL16    | 2.46923207  | 7.899960776 | 9.91211E-51 | 1.31245E-49  |
| 25921     | ZDHHC5    | 2.465825882 | 4.019647739 | 2.71321E-42 | 2.94864E-41  |
| 1058      | CENPA     | 2.460800807 | 6.33705251  | 1.45122E-40 | 1.51778E-39  |
| 101929469 | TEX52     | 2.460245533 | 4.252505657 | 2.95762E-42 | 3.20969E-41  |
| 84300     | UQCCE2    | 2.457305841 | 8.582209693 | 9.48845E-51 | 1.25745E-49  |
| 23142     | DCUN1D4   | 2.456908437 | 0.81183525  | 1.46054E-24 | 9.46848E-24  |
| 128876    | FAM83C    | 2.456742392 | 4.141603364 | 3.62518E-37 | 3.50587E-36  |
| 137682    | NDUFAF6   | 2.456135552 | 5.948550503 | 2.55342E-42 | 2.77894E-41  |
| 708       | C1QBP     | 2.455559174 | 7.500797203 | 2.94932E-47 | 3.61973E-46  |
| 7200      | TRH       | 2.455097319 | 4.110548162 | 1.43619E-10 | 1.473666E-10 |
| 442904    | MIR335    | 2.455009997 | 5.34045228  | 1.06382E-43 | 1.19611E-42  |
| 4185      | ADAM11    | 2.452741112 | 4.590985903 | 2.63639E-45 | 3.0611E-44   |
| 51678     | PALS2     | 2.450372217 | 6.144785533 | 3.60653E-38 | 3.57378E-37  |
| 28957     | MRPS28    | 2.448367506 | 8.149935012 | 1.82758E-48 | 2.30788E-47  |
| 7360      | UGP2      | 2.440738016 | 5.87132204  | 5.19728E-43 | 5.7714E-42   |
| 23295     | MGRN1     | 2.440176482 | 9.61005693  | 9.47145E-52 | 1.2599E-50   |
| 407045    | MIR7-3    | 2.440085385 | 2.901260418 | 1.47196E-33 | 1.28157E-32  |
| 10848     | PPP1R13L  | 2.437659066 | 4.974410089 | 3.26173E-47 | 3.99352E-46  |
| 64087     | MCCCE2    | 2.437322752 | 5.453208288 | 1.29207E-41 | 1.38449E-40  |
| 245711    | SPDYA     | 2.436039648 | 2.606228855 | 8.78292E-35 | 7.95985E-34  |
| 152816    | ODAPH     | 2.432373234 | 1.648675044 | 8.42362E-19 | 6.32648E-18  |
| 23600     | AMACR     | 2.430891797 | 5.500462965 | 3.79684E-32 | 3.16679E-31  |
| 54793     | KCTD9     | 2.426563579 | 6.494125792 | 6.39394E-38 | 6.27888E-37  |

## Downregulated genes in TBI kidney compared with Sham group

| Entrez ID | SYMBOL       | logFC       | logCPM       | P-Value     | FDR         |
|-----------|--------------|-------------|--------------|-------------|-------------|
| 6579      | SLCO1A2      | -2.78721624 | 3.64690232   | 2.72911E-46 | 3.25025E-45 |
| 3976      | LIF          | -2.78551714 | 0.779285875  | 8.6524E-30  | 6.65368E-29 |
| 6195      | RPS6KA1      | -2.78464211 | 6.182785994  | 1.94887E-55 | 2.89114E-54 |
| 8382      | NME5         | -2.78128204 | 5.5128885    | 4.52264E-55 | 6.63842E-54 |
| 116379    | IL22RA2      | -2.78105911 | 1.730720259  | 1.62784E-35 | 1.51114E-34 |
| 80352     | RNF39        | -2.78020523 | 2.655973037  | 5.58509E-37 | 5.37406E-36 |
| 5754      | PTK7         | -2.77762235 | 4.745705133  | 7.78577E-58 | 1.2252E-56  |
| 26        | AOC1         | -2.77588166 | 5.002129882  | 1.51404E-47 | 1.87021E-46 |
| 222545    | GPRC6A       | -2.7758219  | 1.361179393  | 1.49555E-29 | 1.14032E-28 |
| 65124     | SOWAHC       | -2.76658658 | 5.379045499  | 6.02544E-57 | 9.29987E-56 |
| 1870      | E2F2         | -2.76631627 | 3.919986346  | 5.87219E-50 | 7.66244E-49 |
| 1050      | CEBPA        | -2.76592034 | 5.709512232  | 1.79513E-51 | 2.4167E-50  |
| 7153      | TOP2A        | -2.76245228 | 2.504371209  | 4.8064E-40  | 4.96899E-39 |
| 1236      | CCR7         | -2.75954357 | 3.300909108  | 4.12523E-33 | 3.53327E-32 |
| 1969      | EPHA2        | -2.7516307  | 3.97091229   | 6.53075E-52 | 8.9098E-51  |
| 55273     | TMEM100      | -2.74951946 | 7.710861337  | 6.3955E-53  | 8.94083E-52 |
| 6536      | SLC6A9       | -2.74499268 | 5.988137111  | 2.32345E-55 | 3.44015E-54 |
| 640       | BLK          | -2.73849395 | 1.620274379  | 1.1724E-34  | 1.05688E-33 |
| 5004      | ORM1         | -2.73351091 | 2.854656906  | 5.66932E-41 | 5.99081E-40 |
| 441376    | AARD         | -2.72499922 | 4.902051364  | 2.13191E-51 | 2.86001E-50 |
| 84698     | CAPS2        | -2.72492718 | 0.697059664  | 2.13729E-28 | 1.56183E-27 |
| 4317      | MMP8         | -2.72167501 | 1.587495232  | 1.35353E-31 | 1.10657E-30 |
| 55504     | TNFRSF19     | -2.72001864 | 5.825824309  | 1.47687E-45 | 1.7266E-44  |
| 57713     | SFMBT2       | -2.71950061 | 1.506142709  | 7.18656E-27 | 5.05341E-26 |
| 344387    | CDKL4        | -2.71812668 | 2.248407052  | 1.62179E-39 | 1.66092E-38 |
| 960       | CD44         | -2.71751139 | 4.833050315  | 3.91317E-58 | 6.18978E-57 |
| 1269      | CNR2         | -2.71609881 | 2.477247853  | 9.3616E-40  | 9.63268E-39 |
| 9108      | MTMR7        | -2.71603176 | 2.342746618  | 8.41192E-40 | 8.66133E-39 |
| 9023      | CH25H        | -2.71346605 | 2.470279E    | 1.94916E-34 | 1.74272E-33 |
| 64800     | EFCAB6       | -2.70727908 | 2.255574971  | 2.66746E-39 | 2.51681E-38 |
| 22844     | FRMPD1       | -2.70526139 | 2.232135065  | 4.29081E-40 | 4.44198E-39 |
| 3676      | ITGA4        | -2.70347471 | 3.048192459  | 1.06543E-43 | 1.19704E-42 |
| 3689      | ITGB2        | -2.70186037 | 6.057918057  | 2.00318E-40 | 2.08647E-39 |
| 6404      | SELPLG       | -2.70157091 | 5.935059608  | 1.09418E-53 | 1.55237E-52 |
| 976       | ADGRE5       | -2.70097401 | 6.328005208  | 2.66805E-46 | 3.18002E-45 |
| 3084      | NRG1         | -2.70090669 | 2.462678733  | 3.50962E-39 | 3.57275E-38 |
| 2890      | GRIA1        | -2.70068116 | 1.449663551  | 1.5963E-32  | 1.34909E-31 |
| 79772     | MCTP1        | -2.69913563 | 3.227703388  | 9.68761E-36 | 9.03703E-35 |
| 307       | ANXA4        | -2.69605584 | 7.612451334  | 3.02763E-48 | 3.80389E-47 |
| 1043      | CD52         | -2.69593284 | 6.216617776  | 1.11646E-53 | 1.57994E-52 |
| 27237     | ARHGEF16     | -2.6912953  | 3.76003778   | 1.1116E-44  | 1.27275E-43 |
| 100532736 | MICOS10-NBL1 | -2.68776555 | 6.59157851   | 6.80912E-52 | 9.2813E-51  |
| 5950      | RBP4         | -2.68508713 | 6.066383323  | 1.90359E-46 | 2.28133E-45 |
| 85329     | LGALS12      | -2.68137376 | 2.817965021  | 1.55108E-38 | 1.54703E-37 |
| 2651      | GCNT2        | -2.6801226  | 6.365956426  | 1.96978E-50 | 2.59915E-49 |
| 729338    | CETNP4P      | -2.67917862 | 4.696458456  | 1.48768E-51 | 2.00988E-50 |
| 27065     | NSG1         | -2.67900053 | 3.430559605  | 1.49113E-43 | 1.67164E-42 |
| 286207    | FCAP157      | -2.67676327 | 2.746775771  | 7.66793E-41 | 8.08041E-40 |
| 57639     | CCDC146      | -2.67631156 | 3.195315623  | 3.5798E-42  | 3.87663E-41 |
| 7039      | TGFA         | -2.67605303 | 1.957991398  | 5.9861E-36  | 5.6184E-35  |
| 4038      | LRP4         | -2.6749751  | 5.6723615    | 3.88465E-43 | 4.33266E-42 |
| 80164     | PRR36        | -2.6726522  | 0.505273774  | 1.89194E-26 | 6.25435E-25 |
| 2582      | GALE         | -2.67120337 | 3.114520182  | 1.32345E-42 | 1.45171E-41 |
| 64063     | PRSS22       | -2.66988809 | 1.245391767  | 4.45516E-24 | 2.84713E-23 |
| 11005     | SPINK5       | -2.66936565 | 0.909204924  | 2.26199E-29 | 1.71615E-28 |
| 147798    | TMCA         | -2.66862169 | 6.690067316  | 1.07614E-29 | 8.22997E-29 |
| 11226     | GALNT6       | -2.66726538 | 2.215509363  | 4.03944E-39 | 4.06663E-38 |
| 8993      | PGLYR1P      | -2.66616634 | 1.068209782  | 6.55541E-29 | 4.88856E-28 |
| 10437     | IFI30        | -2.66532869 | 7.634737324  | 6.57354E-45 | 7.56353E-44 |
| 84002     | B3GNT5       | -2.66489253 | 2.224413051  | 1.22509E-38 | 1.22589E-37 |
| 80004     | ESRP2        | -2.66256822 | 3.926730592  | 7.62378E-46 | 9.47468E-45 |
| 810       | CALML3       | -2.66219408 | 0.366346918  | 5.69206E-25 | 3.76025E-24 |
| 4638      | MYLK         | -2.66059805 | 7.927985442  | 3.13792E-52 | 4.3352E-51  |
| 27299     | ADAMDEC1     | -2.65969923 | 2.283462223  | 6.57977E-29 | 4.90433E-28 |
| 9493      | KIF23        | -2.65892954 | 2.712326746  | 3.41157E-43 | 3.8078E-42  |
| 112937    | GLB1L3       | -2.65880593 | 0.575220143  | 6.58313E-25 | 4.33766E-24 |
| 6693      | SPN          | -2.65846498 | 3.761076486  | 3.4711E-45  | 4.01198E-44 |
| 55225     | RAVER2       | -2.65765207 | 3.943783581  | 9.33772E-35 | 8.44762E-34 |
| 80323     | CCDC68       | -2.6546884  | 0.5035712403 | 1.324E-45   | 1.55025E-44 |
| 9619      | ABCG1        | -2.65222277 | 5.64464418   | 1.62728E-48 | 2.05665E-47 |
| 79767     | ELMO3        | -2.65184191 | 0.95811567   | 1.18718E-28 | 8.75066E-28 |
| 10409     | BASP1        | -2.65159185 | 6.04790298   | 2.6519E-49  | 3.39088E-48 |
| 3934      | LCN2         | -2.64957183 | 5.667460507  | 2.04353E-43 | 2.28756E-42 |
| 212262    | CCDC162P     | -2.64897728 | 2.900803779  | 3.98117E-40 | 1.41242E-39 |
| 921       | CD5          | -2.64877284 | 0.904804833  | 5.79834E-29 | 4.3347E-28  |
| 140628    | GATA5        | -2.64785359 | 2.134863913  | 3.79856E-34 | 3.37258E-33 |
| 340146    | SLC35D3      | -2.64443338 | -0.35723848  | 3.24063E-19 | 1.69346E-18 |
| 8857      | FCGBP        | -2.64435043 | 1.252709011  | 2.57592E-22 | 1.5345E-21  |
| 4128      | MAOA         | -2.64286954 | 2.86549654   | 9.98472E-36 | 9.30815E-35 |
| 327657    | SERPINA9     | -2.64191745 | 1.069116639  | 4.09546E-28 | 2.96581E-27 |
| 7286      | TUFT1        | -2.63875789 | 5.490211619  | 8.26291E-40 | 8.51364E-39 |
| 55612     | FERM1T       | -2.63483329 | 2.065709533  | 6.29673E-35 | 7.74069E-34 |
| 51334     | PRR16        | -2.63451951 | 6.004843199  | 2.01333E-26 | 1.39644E-25 |
| 340277    | FAM221A      | -2.63428143 | -0.46684241  | 1.48788E-16 | 6.88725E-16 |
| 145447    | ABHD12B      | -2.63359824 | 1.136848602  | 3.956E-21   | 2.25215E-20 |
| 83850     | ESYT3        | -2.63106454 | 3.134444994  | 1.2083E-39  | 1.23912E-38 |
| 91319     | DERL3        | -2.63060049 | 3.486067387  | 7.75442E-40 | 7.99511E-39 |
| 64946     | CENPH        | -2.62870416 | 1.979780275  | 1.09698E-28 | 8.0897E-28  |
| 5584      | PRKCI        | -2.62606274 | 7.519248738  | 4.21046E-52 | 5.78559E-51 |
| 27253     | PCDH17       | -2.62532142 | 5.096045679  | 4.64046E-55 | 6.80483E-54 |
| 6714      | SRC          | -2.62127992 | 4.87015178   | 4.42173E-55 | 6.50279E-54 |
| 6509      | SLC1A4       | -2.61247839 | 2.752935551  | 4.23485E-48 | 5.29963E-47 |
| 51703     | CCSL5        | -2.61245516 | 6.85023727   | 8.45899E-57 | 1.0242E-55  |
| 25891     | PAMR1        | -2.61172148 | 3.558155525  | 8.14157E-42 | 8.76696E-41 |
| 70        | ACAA1        | -2.60844344 | 4.086498596  | 2.05995E-40 | 2.14414E-39 |
| 336       | CACNA1D      | -2.60409101 | 2.711509575  | 1.50338E-33 | 1.30801E-32 |

Supplementary table 1

## Upregulated genes in TBI kidney compared with Sham group

| Entrez ID | SYMBOL       | logFC       | logCPM      | P-Value     | FDR         |
|-----------|--------------|-------------|-------------|-------------|-------------|
| 10935     | PRDX3        | 2.426202787 | 5.530297071 | 8.01554E-44 | 9.0456E-43  |
| 4285      | MIPBP        | 2.425129009 | 6.154872986 | 1.5805E-36  | 1.50374E-35 |
| 26521     | TIMM8B       | 2.424507994 | 8.883282056 | 5.00438E-52 | 6.83962E-51 |
| 51305     | KCNK9        | 2.423000011 | 3.208717167 | 5.59535E-38 | 5.4982E-37  |
| 9512      | PMPCB        | 2.42124395  | 8.034640352 | 1.72899E-38 | 1.72111E-37 |
| 29763     | PAC3IN3      | 2.42027957  | 7.810883733 | 2.11292E-45 | 2.46265E-44 |
| 285343    | TCAIM        | 2.420081007 | 6.329006163 | 2.27029E-35 | 2.09481E-34 |
| 4709      | NDUFB3       | 2.420022661 | 8.268379931 | 4.47728E-36 | 4.22041E-35 |
| 1621      | DBH          | 2.417307468 | 4.588364629 | 1.89702E-40 | 1.97725E-39 |
| 23139     | MAST2        | 2.41414852  | 7.569826432 | 3.76081E-38 | 3.72184E-37 |
| 84333     | PCGF5        | 2.412435033 | 6.291337357 | 1.23211E-44 | 1.41024E-43 |
| 333929    | SNAI3        | 2.411850945 | 3.210212676 | 3.45933E-21 | 1.97307E-20 |
| 258010    | SVIP         | 2.409471025 | 5.915995664 | 1.06994E-41 | 1.14969E-40 |
| 390445    | OR5AU1       | 2.408170579 | 3.665722958 | 1.21171E-40 | 1.27163E-39 |
| 6525      | SMTN         | 2.404786733 | 8.261301621 | 8.70028E-47 | 1.05258E-45 |
| 23410     | SIRT3        | 2.403000095 | 7.228647205 | 1.39701E-43 | 1.56728E-42 |
| 100526761 | CDC169-SOHLH | 2.401392182 | 4.594615366 | 8.76355E-43 | 9.64748E-42 |
| 10455     | ECI2         | 2.39956439  | 8.714437471 | 1.0274E-53  | 1.46034E-52 |
| 375033    | PEAR1        | 2.39834613  | 7.648957074 | 1.10287E-45 | 1.29331E-44 |
| 3736      | KCNA1        | 2.397534016 | 3.537005765 | 3.12256E-38 | 3.10024E-37 |
| 27068     | PPA2         | 2.397366214 | 6.948954805 | 9.36167E-37 | 8.95158E-36 |
| 27254     | CSDC2        | 2.396284626 | 6.916303509 | 1.13697E-40 | 1.19401E-39 |
| 335116    | RILPL1       | 2.395290891 | 8.32952391  | 5.51915E-45 | 6.35514E-44 |
| 84062     | DTNBP1       | 2.393485176 | 8.711721637 | 3.67188E-52 | 5.05008E-51 |
| 153768    | PRELID2      | 2.390225326 | 3.131286652 | 7.38401E-25 | 4.85281E-24 |
| 27302     | BMP10        | 2.389194142 | 1.423625616 | 6.73458E-28 | 4.84028E-27 |
| 64762     | GAREM1       | 2.388398463 | 3.533225957 | 3.90155E-37 | 3.77076E-36 |
| 7419      | VDAC3        | 2.38786749  | 8.9093787   | 1.9121E-59  | 3.09501E-58 |
| 8483      | CILP         | 2.38773354  | 3.061183825 | 4.14818E-30 | 3.23389E-29 |
| 5232      | PGK2         | 2.385428466 | 2.906002944 | 2.07526E-27 | 1.4742E-26  |
| 22874     | PLEKHA6      | 2.384437677 | 2.565155137 | 2.21835E-31 | 1.80108E-30 |
| 139322    | APOOL        | 2.381770019 | 5.532147719 | 4.36015E-38 | 4.30382E-37 |
| 5245      | PHB          | 2.380153047 | 3.93068959  | 4.45798E-47 | 5.42772E-46 |
| 23262     | PIIP5K2      | 2.378938818 | 6.224713446 | 1.95378E-31 | 1.59051E-30 |
| 51074     | APIP         | 2.377267962 | 5.961199871 | 1.32971E-38 | 1.38284E-37 |
| 51649     | MRPS23       | 2.375839864 | 8.288694335 | 2.86127E-42 | 3.10733E-41 |
| 401251    | SAPCD1       | 2.373161166 | 5.507558595 | 9.55851E-43 | 1.0515E-41  |
| 10573     | MRPL28       | 2.372336919 | 8.223985838 | 5.7848E-44  | 6.53785E-43 |
| 6263      | RYR3         | 2.370115151 | 2.190328228 | 2.22546E-28 | 1.62393E-27 |
| 284323    | ZNF780A      | 2.369284336 | 5.501425698 | 5.22099E-40 | 5.39396E-39 |
| 11100     | HNRNPUL1     | 2.366696928 | 3.236267949 | 3.81253E-32 | 3.17815E-31 |
| 219438    | ORS5D18      | 2.366613059 | 4.929198229 | 7.8791E-48  | 8.90396E-47 |
| 222553    | SLC35F1      | 2.365411455 | 1.299013232 | 8.89963E-29 | 6.58849E-28 |
| 6588      | SLN          | 2.365258725 | 8.871663711 | 3.65072E-52 | 5.03003E-51 |
| 146862    | UNC45B       | 2.364304748 | 5.654320089 | 1.67454E-38 | 1.66799E-37 |
| 1493      | CTLA4        | 2.359074647 | 3.124048073 | 4.47279E-35 | 4.47279E-35 |
| 80036     | TRPM3        | 2.357925511 | 4.898852137 | 9.51527E-48 | 1.1811E-46  |
| 728637    | MEIKIN       | 2.354601256 | 1.985054306 | 2.67128E-20 | 1.47089E-19 |
| 55664     | CDC37L1      | 2.352132683 | 6.569164719 | 2.4628E-32  | 2.0688E-31  |
| 57456     | KIAA1143     | 2.351297238 | 3.661924045 | 4.99274E-34 | 4.42256E-33 |
| 221477    | C6orf89      | 2.350008266 | 3.710247264 | 1.80999E-37 | 1.76045E-36 |
| 5095      | PCCA         | 2.348900628 | 5.474971829 | 4.192E-32   | 3.48877E-31 |
| 9050      | PSTPIP2      | 2.348109094 | 8.781374739 | 2.94141E-37 | 1.82518E-36 |
| 79746     | ECHDC3       | 2.345020838 | 6.487168647 | 1.27638E-36 | 1.21514E-35 |
| 51103     | NDUFAF1      | 2.344182587 | 7.095434747 | 3.43891E-35 | 3.15975E-34 |
| 7169      | TPM2         | 2.343543148 | 3.788030497 | 7.72248E-39 | 7.78874E-38 |
| 57491     | AHRR         | 2.341165169 | 2.942033029 | 2.57384E-31 | 2.08528E-30 |
| 6336      | SCN10A       | 2.339771293 | 0.675444562 | 8.28583E-23 | 5.04011E-22 |
| 124961    | ZFP3         | 2.33783169  | 3.412016529 | 1.96052E-36 | 1.86182E-35 |
| 766       | CA7          | 2.337472793 | 4.659398647 | 7.49035E-38 | 7.33671E-37 |
| 2235      | FECH         | 2.330436931 | 8.032495067 | 3.50395E-39 | 3.56936E-38 |
| 201965    | RWD4         | 2.330285968 | 4.529826473 | 7.48549E-39 | 7.55471E-38 |
| 29119     | CTNNA3       | 2.322751681 | 1.911198921 | 1.06588E-24 | 6.95119E-24 |
| 9734      | HDAC9        | 2.3212955   | 3.725068352 | 1.68319E-34 | 1.50934E-33 |
| 84693     | MCEE         | 2.321043352 | 9.284666004 | 1.11682E-56 | 1.70992E-55 |
| 161725    | OTUD7A       | 2.320797183 | 2.879154826 | 6.55801E-35 | 5.37534E-34 |
| 26952     | SMR3A        | 2.318758638 | 5.316667079 | 3.12007E-31 | 2.5198E-30  |
| 85476     | GFMI         | 2.31873775  | 6.907652415 | 2.93872E-39 | 2.99577E-38 |
| 7915      | ALDH5A1      | 2.318174404 | 4.763534563 | 3.13142E-35 | 2.82721E-34 |
| 7158      | TP53BP1      | 2.317737301 | 6.891489643 | 5.65823E-32 | 4.68606E-31 |
| 57150     | SMIM8        | 2.317700384 | 7.432392328 | 2.0019E-41  | 1.13746E-40 |
| 10651     | MTX2         | 2.317603324 | 7.42986805  | 7.80248E-42 | 8.41368E-41 |
| 79443     | FYCO1        | 2.317345003 | 7.879793227 | 5.37397E-42 | 5.81135E-41 |
| 84803     | GPA73        | 2.31582055  | 4.030764753 | 8.27409E-39 | 8.33408E-38 |
| 147744    | TMEM190      | 2.313118893 | 1.454131351 | 9.1906E-23  | 5.57936E-22 |
| 72991     | TIWIST1      | 2.312618946 | 0.894635273 | 2.06468E-20 | 1.14347E-19 |
| 7416      | VDAC1        | 2.312484404 | 11.13699443 | 2.10408E-50 | 2.77397E-49 |
| 7417      | VDAC2        | 2.312380605 | 7.389505985 | 4.4136E-37  | 4.25756E-36 |
| 22895     | RPH3A        | 2.31216663  | 7.394046139 | 1.75775E-42 | 1.92534E-41 |
| 91703     | ACY3         | 2.311104143 | 5.579042101 | 4.52412E-40 | 4.68034E-39 |
| 5874      | RAB27B       | 2.307796795 | 6.398354153 | 1.8659E-37  | 1.61719E-32 |
| 2697      | GJA1         | 2.307478089 | 9.61439589  | 6.54048E-47 | 7.93793E-46 |
| 11154     | AP45         | 2.306989943 | 7.66643734  | 9.01093E-35 | 8.16165E-34 |
| 549       | AUH          | 2.303074014 | 6.652047959 | 9.36213E-35 | 8.4647E-34  |
| 6535      | SLC6A8       | 2.301735439 | 8.036275363 | 9.75728E-40 | 1.00263E-38 |
| 22921     | MSRB2        | 2.301396629 | 7.376074606 | 7.51013E-43 | 8.2784E-42  |
| 1629      | DBT          | 2.299127967 | 7.020033664 | 9.05963E-39 | 9.1133E-38  |
| 160760    | PPTC7        | 2.298099143 | 8.066115988 | 2.51958E-46 | 3.00775E-45 |
| 8739      | HRK          | 2.296842083 | -0.0244021  | 3.97175E-19 | 2.06716E-18 |
| 3632      | INPP5A       | 2.295843994 | 9.43985577  | 4.34558E-52 | 5.96591E-51 |
| 4632      | MYL1         | 2.294205381 | 2.649324462 | 6.73354E-32 | 5.55254E-31 |
| 8528      | DDO          | 2.289695032 | 5.488552534 | 7.11147E-34 | 6.27386E-33 |
| 23542     | MAPK8IP2     | 2.28676743  | 7.470224536 | 2.94304E-36 | 2.78278E-35 |
| 51115     | RMDN1        | 2.283182053 | 2.756727303 | 9.66129E-30 | 7.40715E-29 |
| 56910     | STARD7       | 2.279924475 | 7.060242132 | 4.66877E-39 | 4.73698E-38 |
| 138311    | DIPK1B       | 2.279546334 | 5.704908053 | 8.23902E-35 | 7.47578E-34 |

## Downregulated genes in TBI kidney compared with Sham group

| Entrez ID | SYMBOL   | logFC       | logCPM       | P-Value     | FDR         |
|-----------|----------|-------------|--------------|-------------|-------------|
| 23254     | KAZN     | -2.60213033 | 2.027922549  | 2.69589E-33 | 2.32205E-32 |
| 29767     | TMOD2    | -2.59872982 | 4.028518215  | 1.19891E-42 | 1.31605E-41 |
| 85315     | PAQR8    | -2.5982868  | 2.950036518  | 2.57335E-41 | 2.74012E-40 |
| 79901     | CYBRD1   | -2.59736373 | 2.328283676  | 6.50851E-32 | 5.37278E-31 |
| 29109     | FHOD1    | -2.59540079 | 7.14973394   | 1.52712E-45 | 1.78397E-44 |
| 51744     | CD244    | -2.59501735 | 1.229362561  | 2.19564E-23 | 1.36602E-22 |
| 5097      | PCDH1    | -2.59442952 | 5.550231288  | 1.74002E-49 | 2.24556E-48 |
| 5783      | PTPN13   | -2.59441135 | 3.729479128  | 1.89402E-37 | 1.84101E-36 |
| 5891      | MOK      | -2.59425845 | 2.876114974  | 1.10992E-39 | 1.13976E-38 |
| 83891     | SNX25    | -2.59136092 | 6.605503977  | 2.85154E-50 | 3.75293E-49 |
| 3675      | ITGA3    | -2.59047966 | 6.217964611  | 1.11411E-51 | 1.51052E-50 |
| 9856      | KIAA0319 | -2.58851253 | 1.898086206  | 1.92511E-32 | 1.6216E-31  |
| 11227     | GALNT5   | -2.58798019 | -0.40577306  | 3.18326E-19 | 1.66462E-18 |
| 9910      | RABGAP1L | -2.58757456 | 5.838395533  | 1.31758E-44 | 1.5058E-43  |
| 25791     | NGEF     | -2.58624039 | 4.354023927  | 8.87948E-48 | 1.10308E-46 |
| 56920     | SEMA3G   | -2.5857746  | 4.123863836  | 3.58081E-41 | 3.80492E-40 |
| 10538     | BATF     | -2.58496227 | 2.939020732  | 1.50917E-37 | 1.4688E-36  |
| 113230    | MISP3    | -2.58287028 | 5.378983046  | 8.74505E-44 | 9.84704E-43 |
| 8556      | CDC14A   | -2.58257456 | 3.477123565  | 1.24805E-38 | 1.24805E-37 |
| 25981     | DNAH1    | -2.57854735 | 3.101992558  | 4.43049E-26 | 3.03851E-25 |
| 5551      | PRF1     | -2.57465217 | 1.15774842   | 3.85882E-28 | 2.79577E-27 |
| 51626     | DYNC2L1  | -2.57316406 | 4.685039051  | 1.58448E-38 | 1.57931E-37 |
| 29968     | PSAT1    | -2.56666956 | 4.680038372  | 1.92525E-44 | 2.22015E-43 |
| 53820     | RIPPLY3  | -2.56119414 | 6.1406085    | 7.56881E-50 | 9.82595E-49 |
| 6332      | SCN7A    | -2.55813799 | 7.348741473  | 6.99416E-40 | 7.21612E-39 |
| 6328      | SCN3A    | -2.55636278 | 2.775477635  | 1.81422E-36 | 1.72503E-35 |
| 2202      | EFEMP1   | -2.55576877 | 5.254813609  | 1.38159E-41 | 1.47937E-40 |
| 2354      | FOSB     | -2.55375123 | 3.211008659  | 3.59106E-38 | 3.56076E-37 |
| 4884      | NPTX1    | -2.54657031 | 2.026713032  | 1.00914E-23 | 6.35599E-23 |
| 155185    | AMZ1     | -2.54550562 | 3.04594906   | 2.36475E-33 | 2.04143E-32 |
| 51657     | STYX1    | -2.54431959 | 2.96161532   | 1.10785E-37 | 1.08166E-36 |
| 79161     | TMEM243  | -2.54083409 | 6.899832347  | 6.67842E-39 | 6.75356E-38 |
| 64174     | DPEP2    | -2.53632334 | 2.050422779  | 8.06937E-30 | 6.21471E-29 |
| 7553      | ZNF7     | -2.53625255 | 3.127037402  | 3.82742E-39 | 3.89367E-38 |
| 10458     | BAIAP2   | -2.5350665  | 5.497515352  | 1.73067E-45 | 2.02022E-44 |
| 90288     | EFCAB12  | -2.53098443 | 3.512978565  | 3.62763E-40 | 3.76053E-39 |
| 166863    | RBMA6    | -2.53078073 | 0.177625463  | 7.15411E-22 | 4.1883E-21  |
| 115948    | ODAD3    | -2.53074244 | 2.015301486  | 5.1416E-32  | 4.26281E-31 |
| 51267     | CLEC1A   | -2.53049844 | 4.413541101  | 7.0034E-41  | 7.39033E-40 |
| 9079      | LDB2     | -2.52966911 | 5.182911097  | 1.92299E-48 | 2.42636E-47 |
| 146556    | C16orf89 | -2.52619691 | 6.64453447   | 4.5615E-45  | 5.26432E-44 |
| 7062      | TCHH     | -2.52381125 | 1.784963666  | 1.92494E-31 | 1.56786E-30 |
| 27148     | STK36    | -2.52360505 | 3.072638074  | 4.03482E-32 | 3.35979E-31 |
| 392617    | ELFN1    | -2.52029779 | 3.789686716  | 3.35841E-20 | 1.83798E-19 |
| 64005     | MYO1G    | -2.51988234 | 4.303720642  | 1.70569E-35 | 1.58149E-34 |
| 60494     | CDCDC8   | -2.5153306  | 1.834738478  | 2.63728E-30 | 2.07506E-29 |
| 113201    | GOLM2    | -2.51496078 | 5.301950259  | 7.18718E-50 | 9.53436E-49 |
| 84879     | MFSDC2A  | -2.51461008 | 3.901765845  | 1.7847E-29  | 1.35741E-28 |
| 340485    | ACDRA2   | -2.51124752 | 7.279143732  | 1.4072E-44  | 1.60703E-43 |
| 969       | CD69     | -2.51099318 | 2.887258021  | 1.16007E-38 | 1.1631E-37  |
| 58530     | LY6G6D   | -2.51019723 | 2.05621341   | 5.84452E-34 | 5.17106E-33 |
| 81607     | NECTIN4  | -2.50830032 | 1.11162338   | 1.13201E-33 | 9.91237E-33 |
| 9738      | CCP110   | -2.50721013 | 3.96458939   | 6.92396E-36 | 6.4867E-35  |
| 92359     | CRB3     | -2.50603679 | 4.857867523  | 2.77662E-46 | 3.30427E-45 |
| 286077    | FAM83H   | -2.50211989 | 3.123052444  | 2.81492E-38 | 2.79662E-37 |
| 80714     | PBX4     | -2.49909381 | 2.633379554  | 7.25008E-34 | 3.68877E-33 |
| 1360      | CPB1     | -2.49817366 | 0.341301706  | 4.19163E-22 | 2.47672E-21 |
| 22898     | DENN3D   | -2.49108468 | 6.282400569  | 5.27618E-43 | 5.85052E-42 |
| 26191     | PTPN22   | -2.49101774 | 1.635175018  | 6.82783E-30 | 5.27715E-29 |
| 54847     | SIDT1    | -2.48713604 | 2.563166411  | 1.70333E-34 | 1.52561E-33 |
| 10232     | MSLN     | -2.48533949 | 0.066133236  | 3.72723E-46 | 4.41832E-45 |
| 26136     | TES      | -2.48202167 | 4.071055652  | 5.55028E-42 | 5.99351E-41 |
| 5818      | NECTIN1  | -2.48063925 | 3.926660392  | 8.77667E-37 | 8.40273E-36 |
| 5272      | SERPINB9 | -2.48037705 | 4.59247897   | 3.32717E-46 | 4.06893E-45 |
| 5152      | PDE9A    | -2.47947005 | 1.176375388  | 1.3666E-41  | 3.3329E-40  |
| 10626     | TRIM16   | -2.47712593 | 4.293767484  | 3.90911E-41 | 4.14512E-40 |
| 728113    | ANXA8L1  | -2.47476509 | 5.447720202  | 2.87166E-45 | 3.33174E-44 |
| 23007     | PLCH1    | -2.47470986 | 1.313334062  | 2.88505E-28 | 2.10122E-27 |
| 63924     | CIDE     | -2.47299829 | 4.623562543  | 5.4398E-44  | 6.27497E-43 |
| 80725     | SRCN1    | -2.47289894 | 0.347089694  | 9.28436E-22 | 5.42505E-21 |
| 8534      | CHST1    | -2.46922046 | 5.771806394  | 5.50151E-45 | 6.33959E-44 |
| 388389    | CCDC103  | -2.46483018 | 1.194828162  | 1.50463E-27 | 1.07283E-26 |
| 8826      | IQGAP1   | -2.46475379 | 5.757281965  | 6.32951E-48 | 7.8951E-47  |
| 3918      | LAMC2    | -2.46442313 | 1.673015916  | 3.00779E-21 | 2.17296E-20 |
| 23094     | SIPA1L3  | -2.46023903 | 3.152011024  | 1.26839E-37 | 1.23682E-36 |
| 27334     | P2RY10   | -2.45854891 | 0.650758111  | 8.83029E-23 | 5.36488E-22 |
| 6510      | SLC1A5   | -2.45321756 | 7.635937918  | 6.64868E-32 | 5.84802E-31 |
| 100505383 | BP1FB5P  | -2.45155442 | 1.452755981  | 1.26078E-27 | 9.01035E-27 |
| 54440     | SASH3    | -2.44532513 | 4.02942789   | 5.04098E-39 | 8.56101E-38 |
| 25800     | SLC39A6  | -2.44463354 | 3.3502671588 | 1.65558E-41 | 1.77027E-40 |
| 23670     | CEMP12   | -2.44211456 | 7.097531794  | 3.43567E-33 | 2.94927E-32 |
| 79740     | ZBBX     | -2.44188664 | 0.476815779  | 1.79939E-22 | 1.07664E-21 |
| 22992     | KDM2A    | -2.44116661 | 2.923377224  | 1.68439E-34 | 1.50953E-33 |
| 115572    | TENT5B   | -2.43940612 | 3.847000339  | 1.0542E-38  | 1.05905E-37 |
| 728763    | CROCC2   | -2.4371797  | 0.851771551  | 4.08007E-24 | 2.61152E-23 |
| 301       | ANXA1    | -2.43637866 | 8.55649795   | 5.74508E-51 | 7.62682E-50 |
| 130340    | AP1S3    | -2.43361672 | 2.889228817  | 1.30409E-33 | 1.13801E-32 |
| 1534      | CYB5E1   | -2.4308472  | 7.109286576  | 9.10334E-47 | 1.10131E-45 |
| 6809      | STX3     | -2.4299648  | 4.33493166   | 2.44993E-33 | 2.11377E-32 |
| 4642      | MYO1D    | -2.42927592 | 7.660409597  | 7.95391E-45 | 9.3116E-44  |
| 7122      | CLDN5    | -2.42966348 | 9.087121402  | 3.5128E-45  | 3.53477E-44 |
| 3304      | HSPA1B   | -2.42962365 | 5.607974093  | 5.04054E-34 | 5.60153E-42 |
| 1718      | DHCR24   | -2.42585885 | 3.584316274  | 1.05024E-34 | 1.26381E-33 |
| 22996     | TTC39A   | -2.42583498 | 4.452270038  | 7.09208E-43 | 7.82999E-42 |
| 9075      | CLDN2    | -2.42361142 | 2.289196743  | 1.37673E-30 | 1.09125E-29 |
| 5655      | KLK10    | -2.42325693 | 1.001663908  | 6.76424E-21 | 3.81252E-20 |

Supplementary table 1

## Upregulated genes in TBI kidney compared with Sham group

| Entrez ID | SYMBOL     | logFC       | logCPM      | P-Value     | FDR         |
|-----------|------------|-------------|-------------|-------------|-------------|
| 84311     | MRPL45     | 2.279006228 | 1.18155482  | 1.03555E-20 | 5.79606E-20 |
| 594       | BCKDHB     | 2.226560052 | 7.79440886  | 5.24556E-30 | 4.0707E-29  |
| 401207    | C5orf63    | 2.275969024 | 4.135886883 | 5.84589E-35 | 5.33603E-34 |
| 9332      | CD163      | 2.275376993 | 5.330539139 | 6.88881E-43 | 7.61106E-42 |
| 2315      | MLANA      | 2.275006294 | 5.295965098 | 1.5707E-31  | 1.28275E-30 |
| 346562    | GNAT3      | 2.274447916 | 2.841071743 | 1.00968E-20 | 5.65953E-20 |
| 5465      | PPARA      | 2.27419956  | 1.476076517 | 3.7807E-22  | 2.23565E-21 |
| 83734     | ATG10      | 2.273363725 | 6.281618966 | 5.32327E-36 | 5.00244E-35 |
| 79639     | TMEM53     | 2.272774634 | 6.226867378 | 1.10211E-38 | 1.10573E-37 |
| 80303     | EFHD1      | 2.27202692  | 3.008498787 | 6.77982E-33 | 5.78424E-32 |
| 2696      | GIPR       | 2.269630235 | -0.31292401 | 5.15389E-16 | 2.32442E-15 |
| 92270     | ATP6AP1L   | 2.268850486 | 1.992690243 | 7.90154E-26 | 5.38517E-25 |
| 51300     | TIMMDC1    | 2.268317449 | 4.152477293 | 4.59176E-32 | 3.81523E-31 |
| 6094      | ROM1       | 2.268003199 | 5.711393515 | 2.06362E-35 | 1.90873E-34 |
| 100129515 | ETDB       | 2.265373513 | 2.171190154 | 2.74391E-28 | 1.99937E-27 |
| 619553    | MIR484     | 2.262253776 | 4.33418806  | 9.50362E-35 | 8.58754E-34 |
| 160622    | TAMALIN    | 2.258675646 | 5.801269256 | 4.45126E-38 | 4.39091E-37 |
| 25828     | TXN2       | 2.257950031 | 8.454251389 | 3.65733E-46 | 4.33882E-45 |
| 339345    | NANOS2     | 2.257396782 | 5.504948249 | 6.02495E-39 | 6.09677E-38 |
| 30815     | ST6GALNAC6 | 2.256548322 | 5.59025363  | 1.71387E-31 | 1.39893E-30 |
| 114876    | OSBPL1A    | 2.255628042 | 5.135375694 | 6.80394E-39 | 6.87594E-38 |
| 128061    | C1orf131   | 2.252392775 | 6.340783333 | 5.4407E-28  | 3.92141E-27 |
| 6508      | SLC4A3     | 2.251376267 | 1.739699928 | 4.40306E-27 | 3.10613E-26 |
| 56994     | CHPT1      | 2.250379623 | 6.667269579 | 1.19945E-36 | 1.14404E-35 |
| 57546     | PDP2       | 2.249755329 | 5.809158166 | 1.5002E-35  | 1.3935E-34  |
| 57665     | RDH14      | 2.245453827 | 5.968587609 | 4.90632E-32 | 4.06995E-31 |
| 6580      | SLC22A1    | 2.244179171 | 4.746623435 | 2.70011E-41 | 2.87309E-40 |
| 3895      | KTN1       | 2.240115317 | 7.805009796 | 3.74041E-35 | 3.42852E-34 |
| 4354      | MPP1       | 2.23797719  | 5.491602537 | 1.3475E-11  | 4.75626E-11 |
| 10218     | ANGPTL7    | 2.237730738 | 3.19641496  | 1.21761E-33 | 1.06167E-32 |
| 81563     | C1orf21    | 2.236209085 | 5.033539641 | 1.08053E-37 | 1.05566E-36 |
| 3764      | KCNJ8      | 2.2351721   | 5.30544881  | 1.56693E-32 | 1.32499E-31 |
| 266727    | MDGA1      | 2.23247527  | 0.790144775 | 2.38841E-15 | 1.0439E-14  |
| 84216     | TMEM117    | 2.229995951 | 4.556945793 | 2.26235E-35 | 2.08874E-34 |
| 84681     | HINT2      | 2.229272987 | 8.240934166 | 5.50106E-42 | 5.94457E-41 |
| 400916    | CHCHD10    | 2.229265771 | 10.60285954 | 4.55908E-53 | 6.39695E-52 |
| 64945     | MRP59      | 2.228454045 | 7.109690145 | 1.16363E-33 | 1.01776E-32 |
| 23414     | ZFPM2      | 2.225494879 | 5.074153706 | 5.41675E-41 | 5.73185E-40 |
| 64960     | MRP515     | 2.22546388  | 7.745475919 | 1.84253E-38 | 1.83293E-37 |
| 401036    | ASB18      | 2.224995233 | 3.890983526 | 9.5381E-20  | 5.11376E-19 |
| 150290    | DUSP18     | 2.22164081  | 6.197892777 | 9.61709E-40 | 9.88891E-39 |
| 1180      | CLCN1      | 2.22087518  | -0.10160505 | 1.83919E-18 | 9.31792E-18 |
| 27039     | PKD2L2     | 2.218395104 | 1.948221347 | 4.50911E-27 | 3.17947E-26 |
| 10290     | SPEG       | 2.217040657 | 4.551016951 | 4.78333E-34 | 4.23952E-33 |
| 3983      | ABLIM1     | 2.216607164 | 8.84455894  | 4.84914E-32 | 4.02471E-31 |
| 8572      | PDLM4      | 2.209814428 | 6.118904426 | 6.69173E-38 | 6.55867E-37 |
| 219983    | OR4D6      | 2.207335813 | 2.420705655 | 2.00276E-09 | 6.12289E-09 |
| 79589     | RNF128     | 2.206492451 | 6.312453694 | 3.9742E-35  | 3.64063E-34 |
| 9096      | TBX18      | 2.206204785 | 1.987886025 | 7.15868E-28 | 5.14025E-27 |
| 5565      | PRKAB2     | 2.201109668 | 5.830279039 | 6.60866E-34 | 5.83364E-33 |
| 222234    | FAM185A    | 2.200840251 | 5.604128325 | 1.62541E-33 | 1.41195E-32 |
| 23743     | BHMT2      | 2.199811771 | 1.877755664 | 2.04028E-27 | 1.50002E-26 |
| 10128     | LRPPRC     | 2.198173285 | 7.320055569 | 1.50404E-33 | 1.48081E-32 |
| 51069     | MRPL2      | 2.1940135   | 7.965614113 | 4.93046E-41 | 5.22089E-40 |
| 338707    | B4GALNT4   | 2.192852154 | 2.41890232  | 1.62509E-29 | 1.23786E-28 |
| 26355     | FAM162A    | 2.192679937 | 8.5806211   | 1.33456E-40 | 1.39767E-39 |
| 460       | ASTN1      | 2.192272389 | -0.1428817  | 3.245E-18   | 1.62622E-17 |
| 254295    | PHYHD1     | 2.191646494 | 7.753078519 | 9.3566E-32  | 7.68237E-31 |
| 51318     | MRPL35     | 2.191032899 | 3.231909726 | 1.09211E-26 | 7.61639E-26 |
| 7222      | TRPC3      | 2.189071587 | 3.629885879 | 6.11903E-31 | 4.90292E-30 |
| 10422     | UBAC1      | 2.188656916 | 7.41865379  | 2.17457E-39 | 2.22258E-38 |
| 6863      | TAC1       | 2.183774205 | 1.634691059 | 2.27151E-23 | 1.41149E-22 |
| 54534     | MRPL50     | 2.183501114 | 7.510757662 | 6.94697E-39 | 7.01585E-38 |
| 57104     | PNPLA2     | 2.182347761 | 9.525071726 | 3.80098E-45 | 4.38994E-44 |
| 28513     | CDH19      | 2.181900416 | 0.972408828 | 1.63198E-22 | 9.81758E-22 |
| 7466      | WFS1       | 2.181034339 | 6.041146639 | 9.79712E-31 | 7.80094E-30 |
| 79133     | NDUFAF5    | 2.180970779 | 5.971008673 | 9.81458E-35 | 8.85282E-34 |
| 10082     | GPC6       | 2.180181557 | 4.613141706 | 8.24557E-35 | 7.47729E-34 |
| 4695      | NDUFA2     | 2.179973194 | 8.258321485 | 5.57207E-39 | 5.64223E-38 |
| 3052      | HCCS       | 2.179366612 | 5.695271305 | 1.77494E-31 | 1.44723E-30 |
| 10585     | POMT1      | 2.177536459 | 3.606114807 | 2.6491E-32  | 2.22408E-31 |
| 637       | BID        | 2.176903771 | 4.69400011  | 3.60209E-29 | 2.71534E-28 |
| 1349      | COX7B      | 2.175505359 | 2.436556571 | 4.12846E-23 | 2.53855E-22 |
| 55066     | P DPR      | 2.174911744 | 1.620151181 | 6.1703E-24  | 3.92352E-23 |
| 9407      | TMPPRSS11D | 2.173720958 | 0.679368538 | 5.6483E-18  | 2.79488E-17 |
| 135293    | PM20D2     | 2.171472621 | 1.556133526 | 1.10614E-20 | 6.18662E-20 |
| 257169    | C9orf43    | 2.170889059 | 2.496647397 | 1.31299E-26 | 9.14006E-26 |
| 2350      | FOLR2      | 2.170863089 | 4.145245286 | 2.57748E-34 | 2.29778E-33 |
| 6487      | ST3GAL3    | 2.170541614 | 6.592012418 | 7.84385E-28 | 5.62695E-27 |
| 91461     | PKDCC      | 2.168140504 | 4.949297027 | 2.33072E-32 | 1.96001E-31 |
| 55572     | FOXRED1    | 2.167895905 | 5.330898465 | 2.01514E-33 | 1.74455E-32 |
| 112       | ADCY6      | 2.16598576  | 7.664829843 | 1.04715E-32 | 8.89411E-32 |
| 10446     | LRRN2      | 2.165229505 | 2.271686058 | 3.62279E-28 | 2.631E-27   |
| 107       | ADCY1      | 2.164674596 | 8.814953892 | 9.94723E-22 | 5.80572E-21 |
| 10043     | TOM1       | 2.16302287  | 6.540237898 | 3.99648E-30 | 3.1204E-29  |
| 10993     | SDS        | 2.162522589 | 2.683136382 | 3.06347E-25 | 2.04589E-24 |
| 196446    | MYRFL      | 2.161979253 | 0.949237421 | 1.00352E-22 | 6.08242E-22 |
| 124857    | WFIKKN2    | 2.16135903  | 0.995475815 | 3.19729E-21 | 1.82839E-20 |
| 4922      | NTS        | 2.159826449 | 2.306041523 | 2.37437E-27 | 1.68589E-26 |
| 9248      | GPR50      | 2.158916326 | 6.083553425 | 1.14917E-37 | 1.12129E-36 |
| 6708      | SPTA1      | 2.158277935 | 2.991528085 | 1.47262E-28 | 1.08129E-27 |
| 57593     | EBF4       | 2.157259261 | 5.543900741 | 2.78838E-35 | 2.59755E-34 |
| 282969    | FUOM       | 2.156784819 | 6.924346249 | 3.00926E-32 | 2.51954E-31 |
| 11222     | MRPL3      | 2.153434377 | 6.840422609 | 3.94815E-32 | 3.2894E-31  |
| 283310    | OTOGL      | 2.152482268 | 2.20607464  | 3.00452E-19 | 1.57223E-18 |
| 93611     | FBXO44     | 2.150502685 | 5.863756833 | 2.73862E-36 | 2.59367E-35 |

## Downregulated genes in TBI kidney compared with Sham group

| Entrez ID | SYMBOL       | logFC       | logCPM      | P-Value     | FDR         |
|-----------|--------------|-------------|-------------|-------------|-------------|
| 92840     | REEP6        | -2.42148759 | 6.423358377 | 1.6305E-46  | 1.95712E-45 |
| 6402      | SELL         | -2.42106546 | 4.590178756 | 1.70449E-40 | 1.78022E-39 |
| 23566     | LPAR3        | -2.42022233 | 3.186207574 | 9.5053E-34  | 8.3376E-33  |
| 4318      | MMP9         | -2.41932641 | 3.830530803 | 1.66057E-32 | 1.4003E-31  |
| 8698      | S1PR4        | -2.41575491 | 1.966237487 | 1.90064E-26 | 1.31948E-25 |
| 181       | AGRP         | -2.41558926 | 1.481874451 | 2.97616E-26 | 2.05493E-25 |
| 51673     | TPPP3        | -2.41557101 | 8.866277243 | 9.85907E-45 | 1.13013E-43 |
| 57185     | NIPAL3       | -2.4148422  | 5.557520201 | 2.36374E-43 | 2.64213E-42 |
| 90102     | PHLDB2       | -2.41206685 | 6.684142505 | 4.46103E-38 | 4.39772E-37 |
| 56925     | LXN          | -2.4116672  | 5.656077775 | 2.14312E-41 | 2.28679E-40 |
| 83450     | DRC3         | -2.4061886  | 5.729533192 | 4.78527E-38 | 4.71127E-37 |
| 9630      | GNA14        | -2.40143547 | 3.395933137 | 1.88909E-25 | 1.27384E-24 |
| 91179     | SCARF2       | -2.40112248 | 6.696052807 | 1.53236E-44 | 1.74865E-43 |
| 1380      | CR2          | -2.40019354 | 0.934254694 | 1.79004E-22 | 1.07488E-21 |
| 342346    | C16orf96     | -2.40014016 | 1.669023406 | 2.59133E-27 | 1.83567E-26 |
| 5577      | PRKAR2B      | -2.39574737 | 4.86001225  | 2.21132E-43 | 2.47357E-42 |
| 306       | ANXA3        | -2.39524474 | 7.735601032 | 8.5523E-37  | 8.19305E-36 |
| 7434      | VIPR2        | -2.39329205 | 0.841657279 | 1.74327E-19 | 9.2298E-19  |
| 645638    | WDFC21P      | -2.38916876 | 3.866484843 | 1.42308E-22 | 1.24043E-32 |
| 51186     | TCEAL9       | -2.38898097 | 8.432275953 | 9.85388E-42 | 1.06033E-40 |
| 81671     | VMP1         | -2.38848291 | 4.569734672 | 4.69033E-38 | 4.62078E-37 |
| 914       | CD2          | -2.38778332 | 4.26817774  | 4.11342E-36 | 3.87982E-35 |
| 6505      | SLC1A1       | -2.38777445 | 4.77489702  | 5.8595E-43  | 6.49262E-42 |
| 150       | ADRA2A       | -2.3877202  | 1.170306613 | 4.23088E-25 | 2.8059E-24  |
| 10631     | POSTN        | -2.38534864 | 8.234425455 | 1.12774E-41 | 1.21095E-40 |
| 115677    | NOSTRIN      | -2.38515803 | 5.747013816 | 2.60502E-40 | 2.7078E-39  |
| 58986     | PGAP6        | -2.38506953 | 3.518720264 | 4.46866E-35 | 4.08625E-34 |
| 91526     | ANKRD44      | -2.38223999 | 6.488901477 | 2.60099E-45 | 3.02459E-44 |
| 140686    | WDFC3        | -2.38190656 | 3.482634999 | 9.82877E-37 | 8.543E-36   |
| 7004      | TEAD4        | -2.3796108  | 1.595029915 | 9.90324E-21 | 5.55512E-20 |
| 54491     | OTULINL      | -2.37905415 | 4.984734947 | 6.18559E-43 | 6.84898E-42 |
| 100528030 | POC1B-GALNT4 | -2.37752721 | 4.585860854 | 6.50572E-37 | 6.24418E-36 |
| 3691      | ITGB4        | -2.37710349 | 4.421596807 | 2.02854E-42 | 2.21559E-41 |
| 3552      | IL1A         | -2.37668668 | 2.5021443   | 1.26285E-25 | 8.54953E-25 |
| 221749    | PXDC1        | -2.37411781 | 6.306716632 | 3.08333E-44 | 3.50025E-43 |
| 160728    | SLC5A8       | -2.37335704 | 1.156826064 | 3.2471E-25  | 2.16379E-24 |
| 7348      | UPK1B        | -2.37083057 | 6.382740992 | 1.33122E-43 | 1.49456E-42 |
| 64714     | PDIA2        | -2.37062612 | 2.108227588 | 8.66965E-30 | 6.66334E-29 |
| 5209      | PFKFB3       | -2.36957797 | 6.013483072 | 7.73147E-31 | 6.17225E-30 |
| 3726      | JUNB         | -2.36675574 | 5.352931607 | 1.12782E-40 | 1.18603E-39 |
| 375307    | CATIP        | -2.36673633 | 4.26891809  | 5.46226E-37 | 5.25919E-36 |
| 491       | ATP2B2       | -2.36547759 | 2.496383416 | 4.62462E-28 | 3.34584E-27 |
| 4261      | CIITA        | -2.36483659 | 6.269255625 | 1.63918E-32 | 1.38303E-31 |
| 1521      | CTSW         | -2.36419133 | 2.373160913 | 4.7171E-23  | 2.89583E-22 |
| 1296      | COL8A2       | -2.36308451 | 3.7966042   | 6.76826E-36 | 6.34472E-35 |
| 94241     | TP53INP1     | -2.36195617 | 6.379053221 | 3.34839E-37 | 3.24435E-36 |
| 57698     | SHTN1        | -2.36195269 | 5.861044705 | 2.0732E-37  | 2.01389E-36 |
| 166336    | PRICKLE2     | -2.36050931 | 6.602625538 | 5.57344E-40 | 5.75513E-39 |
| 5933      | RBL1         | -2.36024702 | 3.201322964 | 8.5377E-34  | 7.50179E-33 |
| 1945      | EFNA4        | -2.3592772  | 1.643195598 | 1.24763E-21 | 7.24862E-21 |
| 1476      | CSTB         | -2.358933   | 8.767236062 | 2.60362E-45 | 3.02534E-44 |
| 9001      | HAP1         | -2.35796381 | 3.438192908 | 2.04107E-35 | 1.88901E-34 |
| 25854     | FAM149A      | -2.35657174 | 0.944646948 | 3.07434E-24 | 1.97461E-23 |
| 8434      | RECK         | -2.35592753 | 5.417594477 | 3.1432E-44  | 3.56556E-43 |
| 1894      | ECT2         | -2.35569429 | 1.004773302 | 1.77861E-22 | 1.0687E-21  |
| 11151     | CORO1A       | -2.35529129 | 7.028076819 | 3.43002E-40 | 3.55809E-39 |
| 79925     | SPEF2        | -2.35488161 | -0.1363099  | 3.73623E-16 | 1.69606E-15 |
| 4609      | MYC          | -2.35470947 | 3.002950712 | 7.15798E-33 | 6.09665E-32 |
| 9535      | MGF          | -2.35355604 | 3.490400953 | 3.73309E-25 | 2.48312E-24 |
| 1501      | CTNND2       | -2.35269408 | 1.941927209 | 2.50745E-23 | 1.55621E-22 |
| 148109    | FAM187B      | -2.350346   | 2.307393026 | 7.20259E-26 | 4.91319E-25 |
| 56978     | PRDM8        | -2.34796289 | 2.727617844 | 3.91714E-31 | 3.15352E-30 |
| 23225     | NUP210       | -2.34557779 | 5.016357186 | 9.86037E-38 | 9.64574E-37 |
| 408       | ARRB1        | -2.34301144 | 6.998386132 | 1.27781E-37 | 1.24521E-36 |
| 11253     | MAN1B1       | -2.3426235  | 4.329320663 | 5.73437E-06 | 1.3101E-05  |
| 11000     | SLC27A3      | -2.34064044 | 3.275157997 | 9.12833E-34 | 8.01154E-33 |
| 23533     | PIK3R5       | -2.33947613 | 3.367145977 | 4.42731E-37 | 3.78776E-32 |
| 6926      | TBX3         | -2.33647356 | 7.354350517 | 6.54462E-38 | 6.4186E-37  |
| 100131451 | TLR12P       | -2.33633046 | 1.711329736 | 7.43431E-27 | 5.22522E-26 |
| 225689    | MAPK15       | -2.33390944 | 3.730925519 | 1.79252E-34 | 1.60361E-33 |
| 6456      | SH3GL2       | -2.33303636 | 2.326426864 | 8.53902E-31 | 6.80983E-30 |
| 9469      | CHST3        | -2.32960962 | 3.68529517  | 1.11476E-33 | 9.7669E-33  |
| 4616      | GADD45B      | -2.32920636 | 1.4892798   | 1.22756E-39 | 2.47949E-38 |
| 128414    | NKAINA       | -2.32510573 | 6.823094735 | 1.01642E-38 | 1.02177E-37 |
| 10403     | NDC80        | -2.32300399 | 0.839046555 | 2.36612E-20 | 1.30615E-19 |
| 5788      | PTPRC        | -2.32167643 | 5.457587665 | 1.1364E-40  | 1.19401E-39 |
| 11184     | MAP4K1       | -2.32156407 | 2.74642473  | 1.83393E-32 | 1.54564E-31 |
| 84223     | IQCG         | -2.32044156 | 0.635234072 | 4.6955E-21  | 2.66026E-20 |
| 39        | ACAT2        | -2.31791167 | 5.527431627 | 2.73956E-36 | 2.59367E-35 |
| 6002      | RG512        | -2.3169288  | 2.743776639 | 8.29866E-27 | 8.18934E-26 |
| 57127     | RHBG         | -2.31689549 | 1.49807627  | 1.63482E-25 | 1.10287E-24 |
| 7059      | THBS3        | -2.31361424 | 4.339383063 | 3.21454E-36 | 3.03574E-35 |
| 148327    | CREB3L4      | -2.31169806 | 2.216072315 | 6.75408E-31 | 5.40044E-30 |
| 25803     | SDFE         | -2.31075801 | 1.794840721 | 1.49442E-25 | 1.00949E-24 |
| 27033     | ZBTB32       | -2.30954577 | 1.888190852 | 9.80907E-24 | 6.23233E-23 |
| 3687      | ITGAX        | -2.30820238 | 5.632350768 | 3.36659E-35 | 3.09516E-34 |
| 4359      | MPZ          | -2.30678484 | 0.569003587 | 1.41498E-21 | 8.2053E-21  |
| 72850     | ILIR2        | -2.30134585 | 2.373491942 | 1.96328E-29 | 1.49248E-28 |
| 8711      | TNKN1        | -2.30105469 | 4.30701014  | 5.47721E-34 | 4.84888E-33 |
| 284654    | RSPON1       | -2.29881944 | 2.951686222 | 6.10945E-32 | 5.05427E-31 |
| 5819      | NECTIN2      | -2.29827275 | 3.749126941 | 4.89906E-36 | 4.60466E-35 |
| 6238      | RRBP1        | -2.29670308 | 4.295536774 | 8.2814E-36  | 7.74417E-35 |
| 100499483 | CCDC180      | -2.29336084 | 4.559030615 | 4.09193E-30 | 3.19167E-29 |
| 5997      | RG52         | -2.29314051 | 9.148149183 | 5.12523E-48 | 6.4034E-47  |
| 9942      | XYLB         | -2.29288493 | 2.284649007 | 6.98263E-29 | 5.19701E-28 |
| 5778      | PTPNP1       | -2.29262686 | 1.247994515 | 6.4432E-25  | 4.24912E-24 |

Supplementary table 1

## Upregulated genes in TBI kidney compared with Sham group

| Entrez ID | SYMBOL   | logFC       | logCPM      | P-Value     | FDR         |
|-----------|----------|-------------|-------------|-------------|-------------|
| 2825      | CMKLR2   | 2.150104527 | 3.528351703 | 2.111E-23   | 2.13497E-22 |
| 9238      | TBRG4    | 2.148195412 | 5.228879178 | 2.83417E-33 | 2.43567E-32 |
| 9524      | TECR     | 2.147134251 | 8.862248437 | 3.32708E-31 | 2.68557E-30 |
| 7295      | TXN      | 2.146873031 | 0.979137937 | 2.42748E-20 | 1.33954E-19 |
| 493753    | COA5     | 2.146736139 | 8.513377996 | 5.94259E-37 | 5.17446E-36 |
| 3739      | KCNA4    | 2.146363655 | 1.016139546 | 3.16903E-22 | 1.87831E-21 |
| 364       | AQP7     | 2.146094516 | 4.886139085 | 1.14093E-39 | 1.17081E-38 |
| 2592      | GALT     | 2.144954341 | 7.918933501 | 1.22402E-38 | 1.22563E-37 |
| 54539     | NDUFB11  | 2.144167571 | 6.8604484   | 6.20956E-37 | 5.96743E-36 |
| 131540    | ZDHHC19  | 2.143849005 | 2.900012864 | 2.28903E-14 | 9.46586E-14 |
| 83940     | TATDN1   | 2.140552075 | 1.778906181 | 2.87054E-22 | 1.70735E-21 |
| 5430      | POLR2A   | 2.139627044 | 4.788458431 | 1.24796E-36 | 1.18883E-35 |
| 390916    | NUDT19   | 2.136633298 | 6.820380679 | 2.13941E-33 | 1.85004E-32 |
| 48482     | HPDL     | 2.136428949 | 2.979041525 | 2.11611E-29 | 1.60627E-28 |
| 4701      | NDUFA7   | 2.135225404 | 8.038397677 | 7.46031E-41 | 8.76705E-40 |
| 3547      | IGSF1    | 2.135059742 | 0.945224964 | 3.09605E-16 | 1.41048E-15 |
| 57722     | IGDCC4   | 2.13316854  | 3.892036778 | 1.55445E-32 | 1.31597E-31 |
| 4288      | MKI67    | 2.13022276  | 6.605637112 | 5.23897E-35 | 4.78777E-34 |
| 10584     | COLEC10  | 2.129725078 | 3.89611043  | 7.38179E-31 | 5.89925E-30 |
| 130589    | GALM     | 2.12738493  | 5.51866637  | 2.05314E-33 | 1.77644E-32 |
| 128272    | ARHGEF19 | 2.124908931 | 4.862575465 | 1.30626E-34 | 1.17548E-33 |
| 322       | APBB1    | 2.123023947 | 8.538134131 | 3.49999E-38 | 3.47272E-37 |
| 7164      | TPD52L1  | 2.122797777 | 2.630036511 | 2.58286E-26 | 1.78499E-25 |
| 617       | BCS1L    | 2.121863247 | 6.324148035 | 8.02856E-35 | 7.28915E-34 |
| 85014     | TMEM141  | 2.119906977 | 1.853255408 | 6.53555E-24 | 4.15232E-23 |
| 81285     | ORS1E2   | 2.11649429  | 2.21654444  | 4.71149E-28 | 3.40708E-27 |
| 83692     | CD99L2   | 2.116155861 | 7.561707609 | 2.54502E-34 | 2.27016E-33 |
| 23107     | MRPS27   | 2.114278132 | 6.218144509 | 7.30944E-35 | 6.64415E-34 |
| 324       | APC      | 2.113403876 | 2.400191989 | 3.7212E-11  | 1.27977E-10 |
| 25841     | ABTB2    | 2.112145422 | 4.460522367 | 3.23952E-28 | 2.3549E-27  |
| 2932      | GSK3B    | 2.111752413 | 0.045791453 | 5.61453E-15 | 2.40241E-14 |
| 80255     | SLC35F5  | 2.110073116 | 7.227477862 | 2.45304E-33 | 2.11526E-32 |
| 11142     | PKIG     | 2.108609632 | 6.597090889 | 6.45994E-32 | 5.33556E-31 |
| 144363    | ETFRF1   | 2.107775861 | 7.985244964 | 1.22649E-40 | 1.28626E-39 |
| 22837     | COBLL1   | 2.107603203 | 7.129207965 | 3.91017E-31 | 3.14958E-30 |
| 10723     | SLC12A7  | 2.107176994 | 6.712385196 | 6.13807E-30 | 4.75125E-29 |
| 2947      | GSTM3    | 2.106899896 | 6.964875439 | 1.20512E-30 | 9.56585E-30 |
| 285489    | DOK7     | 2.106529731 | 3.130539358 | 2.19438E-28 | 1.60120E-27 |
| 6975      | TECTB    | 2.105209803 | 3.65564191  | 9.6649E-29  | 7.14118E-28 |
| 81579     | PLA2G12A | 2.105111287 | 6.794012779 | 2.18215E-28 | 1.59384E-27 |
| 51780     | KDM3B    | 2.102458731 | 2.966898246 | 2.63024E-25 | 1.76505E-24 |
| 1359      | CPA3     | 2.10248419  | 2.883618158 | 6.01311E-25 | 3.96891E-24 |
| 27109     | DMAC2L   | 2.099188657 | 5.144643762 | 5.29E-33    | 4.52329E-32 |
| 201229    | LYRM9    | 2.09840154  | 3.775193232 | 7.5432E-23  | 4.59753E-22 |
| 55222     | LRRC20   | 2.096297679 | 5.556428056 | 7.95524E-30 | 6.133E-29   |
| 587       | BCAT2    | 2.096076972 | 6.0878352   | 1.21439E-32 | 1.06155E-32 |
| 10587     | TXNRD2   | 2.095843178 | 5.724441204 | 6.11171E-26 | 4.17838E-25 |
| 131118    | DNAJC19  | 2.094376715 | 3.428887234 | 1.16317E-24 | 7.56949E-24 |
| 51251     | NTSC3A   | 2.093222867 | 6.999485659 | 6.28479E-34 | 5.55738E-33 |
| 2895      | GRID2    | 2.092562951 | 3.585616181 | 3.87799E-31 | 3.1253E-30  |
| 55680     | RUFY2    | 2.091388447 | 3.865751055 | 1.56455E-30 | 1.23803E-29 |
| 64402     | NMNA1    | 2.091230106 | 3.340413782 | 3.2982E-28  | 2.39641E-27 |
| 84448     | ABLIM2   | 2.089852035 | 3.151098074 | 1.01688E-26 | 7.10464E-26 |
| 64981     | MRPL34   | 2.089460643 | 7.508624748 | 1.07948E-27 | 7.7221E-27  |
| 8801      | SUCLG2   | 2.089049403 | 7.171456808 | 6.56969E-33 | 5.60809E-32 |
| 9909      | DENND4B  | 2.087063172 | 5.050315226 | 2.86894E-31 | 2.31944E-30 |
| 100129480 | MKRN2O5  | 2.086134462 | 9.077075583 | 1.6063E-20  | 8.8481E-20  |
| 65989     | DLK2     | 2.085878804 | 5.014279253 | 2.91741E-32 | 2.49251E-31 |
| 8242      | KDM5C    | 2.084386045 | 4.536083083 | 2.26246E-15 | 9.89705E-15 |
| 1996      | ELAVL4   | 2.084342736 | 1.371680467 | 3.42723E-17 | 1.63701E-16 |
| 92369     | SPSB4    | 2.084196984 | 4.842042915 | 9.80626E-30 | 7.51076E-29 |
| 27235     | COQ2     | 2.083740935 | 7.357593416 | 3.67054E-35 | 3.3665E-34  |
| 65003     | MRPL11   | 2.083513951 | 7.658082267 | 1.2485E-35  | 1.16323E-34 |
| 84668     | FAM126A  | 2.082086173 | 2.618184211 | 7.00767E-28 | 5.03419E-27 |
| 8916      | HERC3    | 2.080732539 | 5.051134526 | 2.73481E-34 | 2.43519E-33 |
| 91543     | RSAD2    | 2.080701219 | 5.573667969 | 1.44902E-32 | 1.22733E-31 |
| 9633      | TESMIN   | 2.080295155 | 2.944555357 | 1.1862E-29  | 8.55051E-29 |
| 200172    | SLFN1    | 2.080123911 | 5.448445566 | 1.68259E-33 | 1.45914E-32 |
| 1411      | CRYBA1   | 2.079347579 | 2.35565881  | 1.03467E-16 | 4.81566E-16 |
| 5212      | VIT      | 2.078685862 | 2.519749014 | 2.22838E-23 | 1.38526E-22 |
| 51076     | CUTC     | 2.074198417 | 5.951691836 | 1.63533E-33 | 1.41977E-32 |
| 150527    | PRSS40A  | 2.07174347  | -0.31531203 | 3.93666E-14 | 1.60537E-13 |
| 85440     | DOCK7    | 2.071486493 | 4.264695816 | 1.61776E-32 | 1.36571E-31 |
| 610       | HCN2     | 2.068506184 | 3.418778918 | 3.69119E-29 | 2.78113E-28 |
| 28316     | CDH20    | 2.065671768 | 1.582373163 | 1.18545E-22 | 7.15954E-22 |
| 10024     | TROAP    | 2.06564823  | 3.513230798 | 2.34606E-29 | 1.17816E-28 |
| 7001      | PRDX2    | 2.064919751 | 9.093257025 | 5.12438E-36 | 4.81849E-35 |
| 84895     | MIGA2    | 2.064916367 | 5.429213474 | 5.02241E-28 | 3.62505E-27 |
| 55208     | DCUN1D2  | 2.063600968 | 6.735517333 | 4.26646E-34 | 3.78361E-33 |
| 2898      | GRIK2    | 2.063194662 | 3.445857412 | 1.0316E-29  | 7.89323E-29 |
| 26585     | GREM1    | 2.062600247 | 3.484490992 | 6.04253E-23 | 6.04253E-22 |
| 4147      | MATN2    | 2.062558402 | 3.395668166 | 4.98188E-29 | 3.73519E-28 |
| 56246     | MRAP     | 2.060886008 | 4.632969984 | 3.02285E-28 | 2.20053E-27 |
| 304260    | UNCX     | 2.058394005 | 4.115720601 | 1.93722E-32 | 1.63089E-31 |
| 6652      | SORD     | 2.058216897 | 7.98383282  | 7.66127E-34 | 6.74333E-33 |
| 23203     | PMPCA    | 2.057307058 | 7.644012661 | 2.13425E-35 | 1.97286E-34 |
| 5179      | PENK     | 2.056803728 | 4.385427829 | 4.13034E-31 | 3.32341E-30 |
| 80142     | PTGES2   | 2.055944216 | 4.799924252 | 2.23983E-30 | 1.76802E-29 |
| 2162      | F13A1    | 2.054356732 | 5.525948423 | 8.55002E-33 | 7.27823E-32 |
| 10440     | TIMM17A  | 2.053700028 | 8.201045839 | 1.03286E-36 | 9.86377E-36 |
| 26589     | MRPL46   | 2.053324532 | 7.266115062 | 4.10486E-34 | 3.6424E-33  |
| 7276      | TTR      | 2.052475788 | 3.685355091 | 1.40831E-27 | 1.00462E-26 |
| 66008     | TRAK2    | 2.051913572 | 8.236234105 | 6.2638E-35  | 5.71408E-34 |
| 257160    | RNF214   | 2.051291462 | 4.83808239  | 1.04533E-31 | 8.57364E-31 |
| 8351      | H3C4     | 2.048541827 | 3.893016557 | 5.24119E-22 | 3.08733E-21 |
| 85397     | RGS8     | 2.047893993 | 2.011344212 | 1.88261E-24 | 1.21736E-23 |

## Downregulated genes in TBI kidney compared with Sham group

| Entrez ID | SYMBOL     | logFC       | logCPM      | P-Value     | FDR         |
|-----------|------------|-------------|-------------|-------------|-------------|
| 81855     | SFXN3      | -2.29217586 | 6.082892029 | 2.76094E-33 | 2.3754E-32  |
| 3929      | LBP        | -2.29165117 | 4.465988736 | 3.69154E-32 | 3.08233E-31 |
| 1733      | DIO1       | -2.29082891 | 1.4981607   | 1.37638E-23 | 8.62282E-23 |
| 27018     | BEX3       | -2.29077654 | 7.184922431 | 1.35211E-35 | 1.25824E-34 |
| 79865     | TREML2     | -2.28874727 | 1.622983376 | 4.69878E-19 | 2.4396E-18  |
| 55510     | DDX43      | -2.28808834 | -0.44510448 | 1.59547E-15 | 7.02759E-15 |
| 56660     | KCNK12     | -2.28632613 | 2.318735332 | 7.30374E-17 | 3.42464E-16 |
| 340719    | NANOS1     | -2.28050636 | 0.344654243 | 9.89184E-19 | 5.05848E-18 |
| 55247     | NEIL3      | -2.28038907 | 0.40527967  | 2.07999E-19 | 1.09821E-18 |
| 3899      | AFF3       | -2.27981954 | 5.629512885 | 9.16297E-36 | 8.55808E-35 |
| 54762     | GRAMD1C    | -2.27917046 | 3.280428517 | 8.88461E-34 | 7.80212E-33 |
| 79739     | TTL7       | -2.27724718 | 3.7491479   | 6.56728E-34 | 5.80047E-33 |
| 55365     | TMEM176A   | -2.27585979 | 3.013428266 | 3.65231E-33 | 3.13172E-32 |
| 963       | CD53       | -2.27239778 | 6.68718996  | 4.49587E-37 | 4.33419E-36 |
| 90634     | N4BP2L1    | -2.27134705 | 4.696953835 | 2.14715E-35 | 1.98358E-34 |
| 81849     | ST6GALNAC5 | -2.2692903  | -0.76407953 | 7.29014E-14 | 2.92986E-13 |
| 7439      | BEST1      | -2.2673506  | 1.850956492 | 1.61093E-26 | 1.11937E-25 |
| 115811    | IQCD       | -2.26654571 | 1.642840418 | 4.00789E-25 | 2.66264E-24 |
| 11238     | CASB       | -2.26639403 | 3.159248448 | 2.66578E-32 | 2.23685E-31 |
| 6480      | ST6GAL1    | -2.26621702 | 6.494269581 | 1.38733E-37 | 1.35108E-36 |
| 340533    | NEXMIF     | -2.26578163 | 0.859407428 | 1.25938E-22 | 7.60306E-22 |
| 10163     | WASF2      | -2.26549789 | 3.744722706 | 9.46348E-28 | 6.77928E-27 |
| 169436    | STKLD1     | -2.25481034 | -0.00777201 | 2.20622E-17 | 1.06613E-16 |
| 27040     | LAT        | -2.25346619 | 3.281345253 | 8.28813E-32 | 6.81974E-31 |
| 4143      | MAT1A      | -2.25341758 | 3.656522248 | 7.78764E-34 | 6.85061E-33 |
| 9840      | TESPA1     | -2.25334063 | 0.688905917 | 2.64635E-20 | 1.45768E-19 |
| 3249      | HPN        | -2.24894929 | 4.609253178 | 3.81523E-38 | 3.77325E-37 |
| 23526     | ARHGAP45   | -2.24572383 | 6.179233201 | 1.2945E-33  | 1.13028E-32 |
| 1179      | CLCA1      | -2.24461247 | 2.174190451 | 6.21151E-29 | 4.63663E-28 |
| 59344     | ALOXE3     | -2.2425972  | -0.32681717 | 2.80586E-15 | 1.22217E-14 |
| 283420    | CLEC9A     | -2.24241175 | 0.974464863 | 1.1145E-22  | 6.74437E-22 |
| 9744      | ACAP1      | -2.24160247 | 1.048897198 | 1.32041E-22 | 7.95892E-22 |
| 132954    | PDCL2      | -2.23920704 | 2.122807691 | 1.85457E-28 | 3.50888E-27 |
| 79858     | NEK11      | -2.23753871 | 1.958726506 | 1.57753E-19 | 8.3726E-19  |
| 10008     | KCNE3      | -2.23720336 | 1.689295599 | 1.60898E-24 | 1.04175E-23 |
| 2625      | GATA3      | -2.23489108 | 3.230248444 | 2.96056E-32 | 2.48012E-31 |
| 11274     | USP18      | -2.23408217 | 5.114757724 | 6.44736E-28 | 4.63821E-27 |
| 10098     | TSPAN5     | -2.23236087 | 4.20499526  | 9.55886E-35 | 8.63235E-34 |
| 55561     | CDC42BPB   | -2.23165344 | 6.810975064 | 9.45869E-37 | 9.0387E-36  |
| 83992     | CTTNBP2    | -2.23150954 | 2.30582406  | 8.08285E-25 | 5.30524E-24 |
| 202243    | CCDC125    | -2.22949198 | 1.419252768 | 1.22283E-18 | 1.12486E-17 |
| 8935      | SKAP2      | -2.22972437 | 7.012326089 | 7.76096E-39 | 7.82239E-38 |
| 928       | CD9        | -2.22965843 | 8.75539104  | 1.18452E-34 | 1.06719E-33 |
| 64218     | SEMA4A     | -2.22809643 | 4.78641635  | 4.11936E-37 | 3.97875E-36 |
| 3682      | ITGAE      | -2.22339273 | 3.406501264 | 2.89479E-18 | 1.45358E-17 |
| 390667    | PTX4       | -2.22297025 | 1.191369242 | 1.77969E-20 | 9.88503E-20 |
| 54854     | FAM83E     | -2.22288456 | 1.400345487 | 8.27154E-24 | 5.21334E-23 |
| 54869     | EPSB1L     | -2.21882326 | 3.505241197 | 8.53715E-30 | 6.56836E-30 |
| 9781      | RNF144A    | -2.21280209 | 6.962463042 | 1.73722E-38 | 1.4713E-37  |
| 55503     | TRPV6      | -2.2114595  | 3.053464716 | 8.07938E-30 | 6.21929E-29 |
| 137362    | GOT1L1     | -2.2095666  | 1.196872495 | 3.11415E-22 | 1.84721E-21 |
| 25890     | ABI3BP     | -2.20787065 | 4.857986489 | 4.73485E-39 | 4.80083E-38 |
| 128611    | ZNFBF3     | -2.20616783 | 1.654742673 | 1.21117E-17 | 5.91079E-17 |
| 4522      | MTFDF1     | -2.20442008 | 7.296603349 | 2.28253E-36 | 2.16493E-35 |
| 257144    | GCSAM      | -2.20286048 | 1.010209876 | 2.45747E-21 | 1.41113E-20 |
| 80195     | TMEM254    | -2.20166471 | 1.725148505 | 2.18841E-24 | 1.41211E-23 |
| 115350    | FCRL1      | -2.20162808 | 6.068881082 | 3.02098E-34 | 2.79975E-33 |
| 79841     | AGBL2      | -2.19470175 | 1.931539058 | 1.15894E-21 | 6.74356E-21 |
| 91775     | NXP3       | -2.19210658 | 2.825886982 | 5.21937E-30 | 4.05244E-29 |
| 89870     | TRIM15     | -2.18970163 | 0.254598672 | 9.72071E-15 | 4.12132E-14 |
| 140731    | ANKRD60    | -2.18596452 | 4.214802123 | 7.06714E-36 | 6.61678E-35 |
| 4643      | MYO1E      | -2.18371332 | 5.923367913 | 2.38572E-36 | 2.26141E-35 |
| 1428      | CRYM       | -2.18302375 | 3.397731413 | 6.53344E-31 | 5.22676E-30 |
| 341       | APOC1      | -2.1828089  | 5.621778808 | 1.22513E-31 | 1.00321E-30 |
| 5935      | BM3        | -2.18098685 | 2.258739824 | 2.64234E-21 | 1.15557E-20 |
| 54894     | RNF43      | -2.18075997 | 2.45119295  | 2.80029E-25 | 1.87696E-24 |
| 283234    | CCDC88B    | -2.1797889  | 3.241295783 | 5.6765E-29  | 4.2484E-28  |
| 51228     | GLTP       | -2.17918205 | 6.712770906 | 1.37045E-33 | 1.19523E-32 |
| 9764      | HAAO513    | -2.17836295 | 6.75605752  | 4.29372E-32 | 3.57147E-31 |
| 85462     | FKD1C      | -2.17743794 | 5.630435677 | 3.42092E-36 | 3.22864E-35 |
| 2675      | GFR2A      | -2.17616596 | 4.385196597 | 3.02712E-32 | 2.5331E-31  |
| 285440    | CYP4V2     | -2.17598409 | 6.949148348 | 1.03018E-37 | 1.00711E-36 |
| 3553      | IL1B       | -2.174678   | 4.736913454 | 1.78707E-39 | 1.82896E-38 |
| 57562     | CEP126     | -2.17220829 | 3.001715588 | 4.92635E-29 | 3.69537E-28 |
| 79789     | CLNM       | -2.17129595 | 2.467601926 | 1.46761E-35 | 1.36405E-34 |
| 538       | ATP7A      | -2.17070176 | 5.340183482 | 4.32633E-25 | 2.86795E-24 |
| 120892    | LRKK2      | -2.17037684 | 5.008603111 | 1.03684E-24 | 6.7676E-24  |
| 3199      | HOXA2      | -2.16878506 | 2.65775837  | 7.76625E-29 | 5.77462E-28 |
| 8321      | FZD1       | -2.16713106 | 4.282423438 | 2.76835E-33 | 2.38044E-32 |
| 10396     | ATP8A1     | -2.16698693 | 6.028076401 | 2.41361E-34 | 2.1542E-33  |
| 23052     | ENDOD1     | -2.16554433 | 4.873722316 | 1.09263E-38 | 1.09694E-37 |
| 29128     | UHRF1      | -2.16512904 | 3.1581607   | 3.35278E-29 | 2.04565E-28 |
| 220004    | PP1R32     | -2.16377705 | 3.36320702  | 2.06271E-25 | 2.04589E-24 |
| 717       | C2         | -2.16260499 | 5.208415626 | 4.32447E-35 | 3.95913E-34 |
| 151354    | LRATD1     | -2.16069566 | 0.325666454 | 1.13092E-30 | 8.9090E-30  |
| 90060     | CCDC120    | -2.1549061  | 4.179426431 | 1.23443E-34 | 1.1115E-33  |
| 124602    | KIF19      | -2.15388521 | 0.658728535 | 5.89949E-20 | 3.19095E-19 |
| 5791      | PTPRE      | -2.15290719 | 4.786865371 | 2.18351E-33 | 1.8871E-32  |
| 83699     | SH3BGR2    | -2.15235757 | 1.910369378 | 2.05563E-20 | 1.13928E-19 |
| 90355     | MACIR      | -2.15228953 | 4.004416744 | 1.61107E-30 | 1.27418E-29 |
| 51285     | RASL12     | -2.15111654 | 6.594450775 | 2.75316E-35 | 6.00086E-34 |
| 54961     | SSH3       | -2.15043153 | 3.311903867 | 9.07935E-30 | 6.97148E-29 |
| 84645     | C22orf23   | -2.15021269 | 4.986259985 | 4.40738E-37 | 4.25452E-36 |
| 3635      | INPP5D     | -2.14924833 | 4.522880761 | 2.06952E-31 | 1.68293E-30 |
| 7056      | THBD       | -2.14850469 | 8.574378059 | 2.513E-41   | 2.67737E-40 |
| 63940     | GPSM3      | -2.14718033 | 4.184722769 | 1.7828E-27  | 1.73756E-26 |

Supplementary table 1

## Upregulated genes in TBI kidney compared with Sham group

| Entrez ID | SYMBOL   | logFC       | logCPM      | P-Value     | FDR         |
|-----------|----------|-------------|-------------|-------------|-------------|
| 57552     | NCEH1    | 2.04788617  | 5.394195692 | 1.72327E-31 | 1.40585E-30 |
| 145508    | CEP128   | 2.044135685 | 4.393494268 | 1.17896E-31 | 9.65923E-31 |
| 285051    | STPG4    | 2.042448413 | 0.511184733 | 5.04729E-18 | 2.50154E-17 |
| 146894    | CD300LG  | 2.041986658 | 5.079476623 | 4.65884E-32 | 3.86886E-31 |
| 440021    | KRTAP5-2 | 2.041482796 | 2.809557279 | 3.76943E-22 | 2.22985E-21 |
| 54463     | RETREG1  | 2.037233477 | 9.135973581 | 2.60006E-37 | 2.52247E-36 |
| 2244      | FGB      | 2.036428012 | 2.393124332 | 7.11615E-24 | 4.51182E-23 |
| 144193    | AMDHD1   | 2.036121235 | 5.485505634 | 3.7815E-32  | 3.15572E-31 |
| 390937    | ERFL     | 2.035753978 | 1.690813993 | 3.84617E-23 | 2.37188E-22 |
| 729533    | FAM72A   | 2.035052836 | 2.052808525 | 5.10731E-07 | 1.2827E-06  |
| 100288485 | MTRNR2L7 | 2.033815625 | 11.13267112 | 3.28907E-43 | 3.67376E-42 |
| 2587      | GALR1    | 2.032914661 | 0.42922997  | 1.1751E-11  | 4.16216E-11 |
| 26211     | OR2F1    | 2.030797253 | 1.482393161 | 3.02102E-20 | 1.6569E-19  |
| 344838    | PAQR9    | 2.029584809 | 1.856776617 | 2.38084E-22 | 1.42051E-21 |
| 122773    | KLHDC1   | 2.029398547 | 5.330095602 | 4.86921E-29 | 3.6543E-28  |
| 249       | ALPL     | 2.028203119 | 4.377589207 | 3.4277E-30  | 2.68591E-29 |
| 10858     | CYP46A1  | 2.027943555 | 5.127574502 | 2.75889E-32 | 2.31371E-31 |
| 140461    | ASB8     | 2.027727301 | 7.304921547 | 1.62499E-29 | 1.23786E-28 |
| 2191      | FAP      | 2.027378153 | 3.85473006  | 7.94556E-30 | 6.12863E-29 |
| 79917     | MAGIX    | 2.026884496 | 4.079064191 | 1.50975E-27 | 1.07598E-26 |
| 145748    | LYSMD4   | 2.025597204 | 5.730020544 | 8.83796E-29 | 6.546E-28   |
| 84304     | NUDT22   | 2.02339711  | 6.627968423 | 5.90879E-32 | 4.89092E-31 |
| 25818     | KLK5     | 2.023048476 | 2.701772439 | 6.08991E-06 | 1.38721E-05 |
| 91749     | MFSDB4   | 2.022084218 | 3.937110912 | 2.92081E-25 | 1.95574E-24 |
| 145407    | ARMH4    | 2.021672774 | 2.709016971 | 2.94547E-25 | 1.97053E-24 |
| 51258     | MRPL51   | 2.02102775  | 4.701832987 | 1.36058E-20 | 7.58748E-20 |
| 84292     | WDR83    | 2.020291776 | 7.700523494 | 6.68845E-29 | 4.98291E-28 |
| 51067     | YARS2    | 2.018442592 | 5.463506137 | 5.2978E-29  | 3.96815E-28 |
| 1358      | CPA2     | 2.017731647 | 1.827187643 | 1.75981E-23 | 1.09934E-22 |
| 348180    | CTU2     | 2.017206215 | 1.721790021 | 7.80704E-21 | 4.39542E-20 |
| 10102     | TSFM     | 2.016963095 | 7.12272986  | 7.77253E-25 | 5.10595E-24 |
| 64951     | MRPS24   | 2.016891659 | 8.566709775 | 6.4918E-38  | 6.37089E-37 |
| 8884      | SLC5A6   | 2.01663969  | 4.267196614 | 2.65057E-31 | 2.1463E-30  |
| 2803      | GOLGA4   | 2.016414334 | 9.035250304 | 5.35166E-31 | 4.29708E-30 |
| 83694     | RPS6KL1  | 2.015164405 | 3.259330159 | 3.22034E-26 | 2.22053E-25 |
| 613212    | CTXN3    | 2.014791581 | 2.302969384 | 2.07405E-17 | 1.00353E-16 |
| 10942     | PRSS21   | 2.014594406 | 1.091610009 | 1.66054E-14 | 6.93063E-14 |
| 1347      | COX7A2   | 2.012404407 | 10.78337324 | 1.27518E-30 | 1.01115E-29 |
| 91419     | ATP23    | 2.012045441 | 2.493302638 | 9.6387E-25  | 6.30207E-24 |
| 151176    | ERFE     | 2.011936769 | 1.780839151 | 6.24151E-23 | 3.81024E-22 |
| 117155    | CATSPER2 | 2.006479701 | 2.867802627 | 5.34026E-24 | 3.40849E-23 |
| 391723    | HELT     | 2.005868521 | 2.564268788 | 3.22915E-23 | 1.99844E-22 |
| 79065     | ATG9A    | 2.005490783 | 5.592265939 | 2.46865E-30 | 1.94438E-29 |
| 26270     | FBXO6    | 2.005272565 | 1.400864788 | 4.67292E-21 | 2.64845E-20 |
| 94031     | HTRA3    | 2.00478741  | 8.190426555 | 3.53335E-35 | 3.24262E-34 |
| 125061    | AFMID    | 2.002565584 | 3.136617134 | 6.86871E-23 | 4.19145E-22 |
| 9812      | DELE1    | 2.00249955  | 5.800970124 | 2.83357E-29 | 2.14236E-28 |
| 388324    | INCA1    | 2.002260315 | 3.52986145  | 1.76123E-23 | 1.09978E-22 |

## Downregulated genes in TBI kidney compared with Sham group

| Entrez ID | SYMBOL    | logFC       | logCPM       | P-Value     | FDR         |
|-----------|-----------|-------------|--------------|-------------|-------------|
| 91894     | C11orf52  | -2.14689088 | 3.9644470473 | 8.51211E-29 | 6.31077E-28 |
| 79848     | CSPP1     | -2.14561828 | 5.182912454  | 2.69203E-31 | 2.17872E-30 |
| 151888    | BTLA      | -2.14556971 | 3.917709084  | 1.3086E-32  | 1.10901E-31 |
| 23508     | TTG9      | -2.14524198 | 3.3762466    | 2.24611E-25 | 1.50993E-24 |
| 3710      | ITPR3     | -2.14490432 | 4.241866324  | 1.089E-30   | 8.66211E-30 |
| 113130    | CDC45     | -2.14373393 | 1.922730559  | 6.02607E-24 | 3.8334E-23  |
| 6503      | SLA       | -2.14183299 | 4.063636208  | 2.35758E-32 | 1.98151E-31 |
| 26095     | PTPN20    | -2.1403274  | -0.43026228  | 5.86019E-14 | 2.37328E-13 |
| 148641    | SLC35F3   | -2.13996875 | 1.367559133  | 1.05393E-22 | 6.38542E-22 |
| 761       | CA3       | -2.13894639 | 7.30192191   | 2.07068E-34 | 1.85029E-33 |
| 79630     | C1orf54   | -2.13724769 | 8.0020555    | 3.37045E-37 | 3.26366E-36 |
| 9962      | SLC23A2   | -2.13505013 | 5.389956675  | 9.79533E-35 | 8.84068E-34 |
| 8541      | PPFIA3    | -2.13475737 | 0.720306222  | 3.23595E-17 | 1.54904E-16 |
| 284076    | TTLL6     | -2.13436006 | 2.828215784  | 5.43403E-20 | 2.9444E-19  |
| 7026      | NR2F2     | -2.13084124 | 5.934549452  | 2.16195E-31 | 1.75716E-30 |
| 7159      | TP53BP2   | -2.13045936 | 4.836430254  | 2.77251E-30 | 2.17698E-29 |
| 10241     | CALCOCO2  | -2.12980167 | -0.08599199  | 2.85331E-12 | 1.05057E-11 |
| 6385      | SDCA      | -2.12940348 | 6.9494774    | 5.30588E-31 | 4.26256E-30 |
| 59277     | NTN4      | -2.12929514 | 3.035518868  | 1.40566E-25 | 9.49954E-25 |
| 54863     | TOR4A     | -2.12683427 | 5.71331196   | 4.7217E-25  | 3.12734E-24 |
| 114801    | TMEM200A  | -2.12466456 | 2.341358362  | 4.91589E-28 | 3.54985E-27 |
| 283229    | CRACR2B   | -2.12033852 | 7.580523818  | 2.01237E-33 | 1.74314E-32 |
| 9992      | KCNE2     | -2.11957683 | 4.279550004  | 2.36736E-29 | 1.79342E-28 |
| 6307      | MSMO1     | -2.11809731 | 5.798971552  | 1.20633E-28 | 8.88327E-28 |
| 3570      | IL6R      | -2.11787007 | 5.986510828  | 3.43472E-30 | 2.69004E-29 |
| 356       | FASLG     | -2.11638762 | 1.216464559  | 2.57091E-19 | 1.35088E-18 |
| 2252      | FGF7      | -2.11606302 | 0.604857123  | 2.47849E-18 | 1.24741E-17 |
| 10418     | SPON1     | -2.11379116 | 2.490669904  | 3.35036E-25 | 2.23163E-24 |
| 1838      | DTNB      | -2.11330758 | 5.424984157  | 9.72051E-33 | 8.26081E-32 |
| 2740      | GLP1R     | -2.11316377 | 1.572459394  | 5.25455E-22 | 1.50449E-21 |
| 340351    | AGBL3     | -2.11193369 | 0.670412695  | 2.70897E-19 | 1.42147E-18 |
| 6376      | CX3CL1    | -2.10934011 | 6.044993703  | 7.92434E-36 | 7.14482E-35 |
| 115650    | TNFRSF13C | -2.10894365 | 2.304456375  | 1.54736E-22 | 9.31219E-22 |
| 3423      | IDS       | -2.10748575 | 3.789985896  | 4.9564E-30  | 3.85413E-29 |
| 54852     | PAQR5     | -2.10635172 | -0.20867406  | 9.3107E-15  | 3.95078E-14 |
| 84958     | SYTL1     | -2.10629186 | -0.3379272   | 1.84788E-14 | 7.69154E-14 |
| 26051     | PPP1R16B  | -2.10498107 | 6.445327846  | 9.16164E-35 | 8.29324E-34 |
| 3070      | HELLS     | -2.10491376 | 2.568322443  | 1.01637E-23 | 6.39893E-23 |
| 100287718 | ANKRD66   | -2.1048153  | 2.472891106  | 3.91488E-25 | 2.60197E-24 |
| 26751     | SH3YL1    | -2.10327013 | 4.3262023    | 6.77475E-32 | 5.58049E-31 |
| 9517      | SPTLC2    | -2.10187493 | 6.700719203  | 3.06812E-27 | 2.17142E-26 |
| 2770      | GNAI1     | -2.10154281 | 5.175906961  | 3.45833E-35 | 3.17567E-34 |
| 137797    | LYPD2     | -2.10150645 | 7.281153141  | 6.33972E-31 | 5.07443E-30 |
| 57495     | NWD2      | -2.10121789 | 0.429846728  | 4.85859E-18 | 2.41193E-17 |
| 83938     | LRMDA     | -2.10116732 | 4.125886406  | 1.18931E-28 | 8.76216E-28 |
| 4739      | NEDD9     | -2.09459923 | 6.956740329  | 2.73066E-33 | 2.35068E-32 |
| 149069    | DCDC2B    | -2.09411181 | 2.802943443  | 1.57791E-16 | 7.29735E-16 |
| 2357      | FPR1      | -2.09375694 | 2.494687943  | 2.85038E-20 | 1.56668E-19 |
| 2823      | GPM6A     | -2.09200119 | 5.113654198  | 1.03146E-28 | 7.61387E-28 |
| 153562    | MARVELD2  | -2.091801   | 3.410748441  | 2.50867E-20 | 1.38335E-19 |
| 201456    | FBXO15    | -2.09086827 | 1.357289639  | 2.58503E-20 | 1.42442E-19 |
| 1101      | CHAD      | -2.090009   | 5.236006298  | 3.1516E-32  | 2.63582E-31 |
| 1848      | DUSP6     | -2.08875064 | 6.158255908  | 2.17532E-34 | 1.94266E-33 |
| 646851    | FAM227A   | -2.08817657 | 1.420909426  | 5.90517E-19 | 3.0535E-18  |
| 5293      | PIK3CD    | -2.08616515 | 4.847136029  | 2.19157E-33 | 1.893E-32   |
| 400746    | NCMAP     | -2.08569659 | 1.260546934  | 2.48387E-20 | 1.37016E-19 |
| 4925      | NUCB2     | -2.08544572 | 5.161116005  | 1.31723E-35 | 1.22652E-34 |
| 79695     | GALNT12   | -2.08474497 | 2.883577137  | 1.6452E-28  | 1.20685E-27 |
| 2719      | GPC3      | -2.08450328 | 5.790742177  | 4.37464E-31 | 3.51813E-30 |
| 31        | ACACA     | -2.08336643 | 4.579823481  | 6.75145E-32 | 5.5643E-31  |
| 26509     | MYOF      | -2.08304875 | 6.390176739  | 5.24623E-35 | 4.79153E-34 |
| 10457     | GPNMB     | -2.08293376 | 3.651352168  | 6.08424E-31 | 4.87761E-30 |
| 5580      | PRKCD     | -2.0823484  | 4.96153063   | 6.3049E-29  | 4.70405E-28 |
| 929       | CD14      | -2.08112602 | 6.110482562  | 1.05246E-31 | 8.62747E-31 |
| 79875     | THSD4     | -2.07951554 | 3.740783137  | 5.67686E-29 | 4.24584E-28 |
| 8743      | TNFSF10   | -2.07344627 | 5.768058795  | 1.44309E-33 | 1.25715E-32 |
| 5178      | PEG3      | -2.07216497 | 3.627579642  | 2.77623E-30 | 2.17878E-29 |
| 56895     | AGPAT4    | -2.07148254 | 6.417268208  | 2.71487E-34 | 2.41885E-33 |
| 80114     | BICC1     | -2.0701573  | -0.02613881  | 9.66531E-15 | 4.09897E-14 |
| 203427    | SLC25A43  | -2.06975839 | 1.63512503   | 2.48881E-22 | 1.48435E-21 |
| 79977     | GRHL2     | -2.06943788 | 2.883053254  | 4.9066E-28  | 3.54481E-27 |
| 3123      | HLA-DRB1  | -2.0685002  | 8.805744537  | 7.03309E-37 | 6.74611E-36 |
| 2781      | GNAZ      | -2.06813906 | 2.499875681  | 2.11793E-18 | 1.07088E-17 |
| 55765     | INAVA     | -2.06778138 | 1.802739664  | 1.12422E-22 | 6.80052E-22 |
| 9127      | P2RX6     | -2.06763094 | 8.135952849  | 7.28293E-35 | 6.624E-34   |
| 994       | CDC25B    | -2.06506248 | 3.434458377  | 1.41236E-24 | 9.15998E-24 |
| 9368      | SLC9A3R1  | -2.06440791 | 5.962835141  | 2.70136E-30 | 2.12331E-29 |
| 81035     | COLEC12   | -2.05935877 | 3.960834455  | 1.98378E-25 | 1.3365E-24  |
| 159       | ADSS2     | -2.05692337 | 5.863126813  | 7.96223E-27 | 5.59112E-26 |
| 432       | ASGR1     | -2.0548872  | 2.881723661  | 1.92971E-23 | 1.204E-22   |
| 388714    | FMO6P     | -2.05437221 | 0.353406357  | 1.18021E-16 | 5.48467E-16 |
| 80740     | LYG6G6    | -2.05418674 | 4.400942274  | 2.32E-17    | 1.11829E-16 |
| 100129354 | NRADDP    | -2.0541768  | 3.937576917  | 5.96931E-30 | 4.62296E-29 |
| 2353      | FOS       | -2.05209912 | 6.126634141  | 6.12936E-32 | 5.06526E-31 |
| 55196     | RESF1     | -2.04607948 | 5.178289248  | 3.45586E-30 | 2.7052E-29  |
| 5165      | PKD3      | -2.04384202 | 1.472208084  | 2.89644E-20 | 1.59085E-19 |
| 899       | CENF      | -2.04347446 | 1.728317779  | 9.57586E-16 | 4.25594E-15 |
| 415117    | STX19     | -2.04211957 | 3.607135343  | 8.56502E-25 | 5.61689E-24 |
| 4091      | SMAD6     | -2.042076   | 5.95599614   | 7.96803E-29 | 5.91888E-28 |
| 164237    | WFDC13    | -2.041217   | 1.781494724  | 3.13737E-22 | 1.86026E-21 |
| 8796      | SCEL      | -2.04110647 | 5.189054218  | 1.18381E-32 | 1.0038E-31  |
| 339829    | CCDC39    | -2.04051172 | 3.294032891  | 8.73453E-27 | 6.11658E-26 |
| 64581     | CLEC7A    | -2.04032911 | 5.139849081  | 4.06506E-33 | 3.48369E-32 |
| 56896     | DPYSL5    | -2.0398562  | 2.666577631  | 2.38394E-19 | 1.25566E-18 |
| 563       | AZGP1     | -2.03970192 | 1.824832198  | 5.08878E-19 | 6.2385E-18  |
| 25876     | SPEF1     | -2.03898037 | 6.012534332  | 9.61511E-31 | 7.664E-30   |

Supplementary table 1

## Upregulated genes in TBI kidney compared with Sham group

| Entrez ID | SYMBOL       | logFC       | logCPM      | P-Value     | FDR         |
|-----------|--------------|-------------|-------------|-------------|-------------|
| 8564      | KMO          | -2.03872591 | 3.516223929 | 6.39778E-21 | 3.60998E-20 |
| 23204     | ARL6IP1      | -2.03848647 | 7.952774373 | 2.52918E-33 | 2.17969E-32 |
| 8544      | PIR          | -2.03819488 | 5.512715585 | 1.81143E-27 | 1.28918E-26 |
| 83593     | RASSF5       | -2.03746997 | 4.293170728 | 3.15541E-25 | 2.10453E-24 |
| 51246     | SHISA5       | -2.03518656 | 7.260200718 | 5.87139E-33 | 5.0148E-32  |
| 2863      | GPR39        | -2.03469862 | 2.725214982 | 1.40232E-25 | 9.48119E-25 |
| 3156      | HMGCR        | -2.0345055  | 2.638174796 | 1.72127E-13 | 6.74729E-13 |
| 23779     | ARHGAP8      | -2.03408926 | 3.457745872 | 1.37545E-27 | 9.81635E-27 |
| 2272      | FHIT         | -2.03393649 | 2.980109789 | 1.16608E-24 | 7.58526E-24 |
| 102724652 | LOC102724652 | -2.02919662 | 0.439502518 | 4.07509E-16 | 1.84575E-15 |
| 1948      | EFNB2        | -2.02825314 | 6.792315483 | 9.62364E-33 | 8.18304E-32 |
| 23612     | PHLDA3       | -2.02555907 | 5.849450398 | 7.86398E-27 | 5.52467E-26 |
| 5836      | PYGL         | -2.0254619  | 4.534485831 | 3.6481E-30  | 2.84984E-29 |
| 79934     | COQ8B        | -2.02479448 | 4.983946831 | 1.60038E-32 | 1.35179E-31 |
| 8676      | STX11        | -2.0233403  | 2.946583197 | 1.35811E-25 | 9.19037E-25 |
| 4751      | NEK2         | -2.02327601 | 2.451645642 | 1.27629E-23 | 8.00889E-23 |
| 56131     | PCDHB4       | -2.02311929 | 1.552433158 | 8.75009E-20 | 4.69952E-19 |
| 51364     | ZMYND10      | -2.02051122 | 3.322181944 | 1.8771E-20  | 1.04185E-19 |
| 1014      | CDH16        | -2.01944687 | 3.320734392 | 1.0176E-24  | 6.64766E-24 |
| 124093    | CCDC78       | -2.01944508 | 4.017665061 | 7.23143E-26 | 4.93067E-25 |
| 79057     | PRRG3        | -2.01912371 | 6.22049776  | 4.58137E-31 | 3.68245E-30 |
| 27136     | MORC1        | -2.01881725 | -0.21645202 | 2.58906E-14 | 1.06777E-13 |
| 7128      | TNFAIP3      | -2.01835381 | 4.596861551 | 1.14499E-25 | 7.77229E-25 |
| 956       | ENTPD3       | -2.01835302 | 3.294984957 | 5.33478E-25 | 3.52728E-24 |
| 389058    | SP5          | -2.01741588 | 1.084302154 | 1.65014E-19 | 8.7458E-19  |
| 4542      | MYO1F        | -2.01488038 | 3.944169451 | 4.10505E-29 | 3.08687E-28 |
| 25939     | SAMHD1       | -2.01385833 | 7.456439555 | 6.15701E-29 | 4.59819E-28 |
| 219793    | TBATA        | -2.01369529 | 0.401562732 | 7.68595E-16 | 3.43496E-15 |
| 11240     | PADI2        | -2.00936134 | 1.803102155 | 5.82449E-22 | 3.42301E-21 |
| 54908     | SPDL1        | -2.0090252  | 0.785917913 | 8.83909E-18 | 4.34001E-17 |
| 56992     | KIF15        | -2.0066319  | 1.329222163 | 1.90277E-19 | 1.00603E-18 |
| 151651    | EFHB         | -2.00623544 | 0.009585808 | 9.78314E-14 | 3.90508E-13 |
| 972       | CD74         | -2.00605734 | 6.949902351 | 3.43287E-26 | 2.3628E-25  |
| 10595     | ERN2         | -2.00499153 | 1.910687563 | 1.09222E-22 | 6.61482E-22 |
| 12        | SERPINA3     | -2.0048953  | 4.781529373 | 1.60017E-33 | 1.39082E-32 |
| 85407     | NKD1         | -2.00387573 | 3.903047259 | 2.70368E-23 | 1.67528E-22 |
| 29095     | ORMDL2       | -2.0037806  | 6.416028395 | 5.41551E-28 | 3.9051E-27  |
| 54510     | PCDH18       | -2.00372028 | 4.09652987  | 4.08945E-30 | 3.19136E-29 |

## Downregulated genes in TBI kidney compared with Sham group

| Entrez ID | SYMBOL       | logFC       | logCPM      | P-Value     | FDR         |
|-----------|--------------|-------------|-------------|-------------|-------------|
| 8564      | KMO          | -2.03872591 | 3.516223929 | 6.39778E-21 | 3.60998E-20 |
| 23204     | ARL6IP1      | -2.03848647 | 7.952774373 | 2.52918E-33 | 2.17969E-32 |
| 8544      | PIR          | -2.03819488 | 5.512715585 | 1.81143E-27 | 1.28918E-26 |
| 83593     | RASSF5       | -2.03746997 | 4.293170728 | 3.15541E-25 | 2.10453E-24 |
| 51246     | SHISA5       | -2.03518656 | 7.260200718 | 5.87139E-33 | 5.0148E-32  |
| 2863      | GPR39        | -2.03469862 | 2.725214982 | 1.40232E-25 | 9.48119E-25 |
| 3156      | HMGCR        | -2.0345055  | 2.638174796 | 1.72127E-13 | 6.74729E-13 |
| 23779     | ARHGAP8      | -2.03408926 | 3.457745872 | 1.37545E-27 | 9.81635E-27 |
| 2272      | FHIT         | -2.03393649 | 2.980109789 | 1.16608E-24 | 7.58526E-24 |
| 102724652 | LOC102724652 | -2.02919662 | 0.439502518 | 4.07509E-16 | 1.84575E-15 |
| 1948      | EFNB2        | -2.02825314 | 6.792315483 | 9.62364E-33 | 8.18304E-32 |
| 23612     | PHLDA3       | -2.02555907 | 5.849450398 | 7.86398E-27 | 5.52467E-26 |
| 5836      | PYGL         | -2.0254619  | 4.534485831 | 3.6481E-30  | 2.84984E-29 |
| 79934     | COQ8B        | -2.02479448 | 4.983946831 | 1.60038E-32 | 1.35179E-31 |
| 8676      | STX11        | -2.0233403  | 2.946583197 | 1.35811E-25 | 9.19037E-25 |
| 4751      | NEK2         | -2.02327601 | 2.451645642 | 1.27629E-23 | 8.00889E-23 |
| 56131     | PCDHB4       | -2.02311929 | 1.552433158 | 8.75009E-20 | 4.69952E-19 |
| 51364     | ZMYND10      | -2.02051122 | 3.322181944 | 1.8771E-20  | 1.04185E-19 |
| 1014      | CDH16        | -2.01944687 | 3.320734392 | 1.0176E-24  | 6.64766E-24 |
| 124093    | CCDC78       | -2.01944508 | 4.017665061 | 7.23143E-26 | 4.93067E-25 |
| 79057     | PRRG3        | -2.01912371 | 6.22049776  | 4.58137E-31 | 3.68245E-30 |
| 27136     | MORC1        | -2.01881725 | -0.21645202 | 2.58906E-14 | 1.06777E-13 |
| 7128      | TNFAIP3      | -2.01835381 | 4.596861551 | 1.14499E-25 | 7.77229E-25 |
| 956       | ENTPD3       | -2.01835302 | 3.294984957 | 5.33478E-25 | 3.52728E-24 |
| 389058    | SP5          | -2.01741588 | 1.084302154 | 1.65014E-19 | 8.7458E-19  |
| 4542      | MYO1F        | -2.01488038 | 3.944169451 | 4.10505E-29 | 3.08687E-28 |
| 25939     | SAMHD1       | -2.01385833 | 7.456439555 | 6.15701E-29 | 4.59819E-28 |
| 219793    | TBATA        | -2.01369529 | 0.401562732 | 7.68595E-16 | 3.43496E-15 |
| 11240     | PADI2        | -2.00936134 | 1.803102155 | 5.82449E-22 | 3.42301E-21 |
| 54908     | SPDL1        | -2.0090252  | 0.785917913 | 8.83909E-18 | 4.34001E-17 |
| 56992     | KIF15        | -2.0066319  | 1.329222163 | 1.90277E-19 | 1.00603E-18 |
| 151651    | EFHB         | -2.00623544 | 0.009585808 | 9.78314E-14 | 3.90508E-13 |
| 972       | CD74         | -2.00605734 | 6.949902351 | 3.43287E-26 | 2.3628E-25  |
| 10595     | ERN2         | -2.00499153 | 1.910687563 | 1.09222E-22 | 6.61482E-22 |
| 12        | SERPINA3     | -2.0048953  | 4.781529373 | 1.60017E-33 | 1.39082E-32 |
| 85407     | NKD1         | -2.00387573 | 3.903047259 | 2.70368E-23 | 1.67528E-22 |
| 29095     | ORMDL2       | -2.0037806  | 6.416028395 | 5.41551E-28 | 3.9051E-27  |
| 54510     | PCDH18       | -2.00372028 | 4.09652987  | 4.08945E-30 | 3.19136E-29 |

Supplementary table 2

Biomarkers in 10 types of kidney cells adpoted from Panglao single cell database

Oscar Franzén, Li-Ming Gan, Johan L M Björkegren, PanglaoDB: a web server for exploration of mouse and human single-cell RNA sequencing data, Database, Volume 2019, 2019, baz046, doi:10.1093/database/baz046

| Kidney_Distal tubule cells | Kidney_Intercalated cells | Kidney_Juxta glomerular cells | Kidney_Kidney progenitor cells | Kidney_Loop of Henle cells | Kidney_Mesangial cells | Kidney_Podocytes | Kidney_Principal cells | Kidney_Proximal tubule cells | Kidney_Transient cells |
|----------------------------|---------------------------|-------------------------------|--------------------------------|----------------------------|------------------------|------------------|------------------------|------------------------------|------------------------|
| CLDN8                      | FOX11                     | TRPV4                         | OSR1                           | CLDN16                     | PDGFB                  | PODXL            | AQP2                   | AQP1                         | SLC26A4                |
| SLC12A3                    | SLC26A11                  | REN                           | PAX2                           | CLDN8                      | PDGFRB                 | ADAMTS13         | SCNN1A                 | CLDN2                        | CAR12                  |
| UMOD                       | CLCNKB                    | TH                            | EYA1                           | UMOD                       | ACTA2                  | LCN2             | AQP3                   | DPP4                         | RHBG                   |
| JAG1                       | SLC4A1                    | REN1                          | WT1                            | FABP4                      | TNS1                   | VEGFA            | KCNJ1                  | ENPEP                        | HEPACAM2               |
| CALB1                      | SLC26A4                   | AKR1B7                        | SIX2                           | AQP1                       | SFRP2                  | SLC2A4           | AVPR2                  | SLC36A2                      | INSRR                  |
| PVALB                      | ATP6V1B1                  | ACTA2                         | SALL1                          | CLDN10                     | ECM1                   | NLRP3            | SCNN1G                 | SLC5A1                       | CLCNKB                 |
| PGAM2                      | SLC4A8                    | MYH11                         | CITED1                         | CLDN19                     | ANGPT2                 | SYNPO            | HSD11B2                | SLC6A18                      | COL18A1                |
| WNK4                       | AQP6                      | CNN1                          |                                | SLC12A1                    | FGF1                   | NPHS1            | FXYP4                  | SLC6A19                      | SLC43A2                |
| SGMS2                      | ATP6V1C2                  |                               |                                | DEFB1                      | CTGF                   | NPHS2            | APELA                  | SLC6A20B                     | TMEM117                |
| SLC16A7                    | ATP6V1G3                  |                               |                                | CLCNKA                     | PLAU                   | LAMA3            | NPNT                   | SLC5A2                       | PARM1                  |
| LHX1                       | ATP6V0D2                  |                               |                                | TRPM7                      | GATA3                  | FOXC2            | SCNN1B                 | LRP2                         | ST14                   |
| ABCA13                     | OXGR1                     |                               |                                | CDH6                       | LEF1                   | WT1              | KCNE1                  | PDZK1                        | ENPP5                  |
| HOXB5OS                    | RHCG                      |                               |                                | LCN2                       | MRC1                   | CD80             | CDH16                  | MIOX                         | GCLC                   |
| EMX1                       | TMEM213                   |                               |                                | DKK1                       | PML                    | DES              | ADGRG1                 | SLC34A1                      | SYT7                   |
| TRPM6                      | EGF                       |                               |                                | DACH1                      | OGT                    | PTPRO            | TSPAN8                 | TTC36                        | ITGAV                  |
| CWH43                      | FXYP2                     |                               |                                | SLC12A3                    | NOCT                   | LMX1B            | CDO1                   | ASS1                         | TMEM50B                |
| TRPM7                      | AVPR1A                    |                               |                                | SLC11A2                    | NCOA2                  | MYOC             | TMEM45B                | PCK1                         | CTNNB1                 |
| UROCI                      | CLCNKA                    |                               |                                | ARVCF                      | PER3                   | CDH13            | TACSTD2                | FUT9                         | ACO2                   |
| TFRC                       | RHBG                      |                               |                                | RGS5                       | PLA2R1                 | SEMA3G           | PDZK1IP1               | KHK                          | SMPD1                  |
| LHX1OS                     | DMRT2                     |                               |                                | COX4I2                     | TRIP4                  | THSD7A           | L1CAM                  | SLC4A4                       | OGDH                   |
| TSC22D2                    | P2RY14                    |                               |                                | CYP4B1                     | AMOTL2                 | MAFB             | CLDN4                  | GLYAT                        | SEC23B                 |
| LARP1B                     | AP1S3                     |                               |                                | PARVB                      | LATS2                  | ENPEP            | TBCK                   | FBP1                         | CDC42BPB               |
| CLCNKB                     | INSRR                     |                               |                                | SH3RF2                     | YAP1                   | CLIC5            | TMEM229A               | SLC22A6                      | PIP4K2C                |
| GBAS                       | JAG1                      |                               |                                | HEY2                       | LRP5                   | RAB3B            | GSTT1                  | SLC22A12                     |                        |
| KLHL3                      | ADGRF5                    |                               |                                | NKAIN4                     | MIB1                   | DPP4             | GPRC5B                 | SLC47A1                      |                        |
| KLK1                       |                           |                               |                                | ADAMTS5                    | NOSTRIN                | ANGPTL2          | TMEM178                | NOX4                         |                        |
| KCNJ1                      |                           |                               |                                | CXCL1                      | ADAMTSL4               | ITGB5            | PHACTR1                | SLC17A1                      |                        |
| HOXD8                      |                           |                               |                                | GEM                        | EMILIN1                | RHPN1            | CELSR2                 | SLC13A3                      |                        |
| KL                         |                           |                               |                                | FGA                        | ITGA8                  | BCAM             | FZD7                   | CYP2E1                       |                        |
| EGF                        |                           |                               |                                | PLA2G7                     | DYRK1A                 | MAGI2            | SLC2A9                 | SLC22A8                      |                        |
| TMEM213                    |                           |                               |                                | THBS1                      | ARID5B                 | COL4A3           | RNF186                 | FOLR1                        |                        |
| KNG2                       |                           |                               |                                | ENC1                       | CCR7                   | EFNB1            | TRPV5                  | SLC7A13                      |                        |
| TMEM52B                    |                           |                               |                                | SPSB1                      | FN1                    | NPR1             | STC1                   | AK4                          |                        |
| WFDC15B                    |                           |                               |                                | ARID5A                     | PAWR                   | PLOD2            | PELI2                  | SLC5A8                       |                        |
| DEFB1                      |                           |                               |                                | CD40                       | PTN                    | SRGAP1           | KLK1                   | SLC22A1                      |                        |
| FXYP2                      |                           |                               |                                | SLC14A2                    | SERPINE2               | LAMB2            | ACER2                  | GHR                          |                        |
| USMG5                      |                           |                               |                                | NRGN                       | TBX18                  | NPR3             | AQP4                   | UPB1                         |                        |
| TRHDE                      |                           |                               |                                | RNF182                     | TEK                    | ITGA3            | FZD1                   | SLC17A3                      |                        |
| KAP                        |                           |                               |                                | PCSK9                      | THY1                   | PLCE1            | GATA3                  | GCDH                         |                        |
| ACSM2                      |                           |                               |                                | DRAM1                      | MYL9                   | PROS1            | LGALS3                 | GSTZ1                        |                        |
| KCNJ16                     |                           |                               |                                | ARC                        | TPM2                   | MERTK            | PTGES                  | ASL                          |                        |
| RHCG                       |                           |                               |                                | NEK6                       | CALD1                  | MYO1D            | TSPAN1                 | FAH                          |                        |
| SOSTDC1                    |                           |                               |                                | CDKN1C                     | HOPX                   | TCF21            | NR3C2                  | SLCO1A6                      |                        |
| SCNN1A                     |                           |                               |                                | CALCRL                     | NR4A2                  | TNS2             | HES1                   | ECI3                         |                        |
| VDR                        |                           |                               |                                | SMARCD3                    | ACTN1                  | ADM              |                        | TMEM106A                     |                        |
| WNK1                       |                           |                               |                                | KCNT1                      | AKAP12                 | OPTN             |                        | GSTA2                        |                        |
| SLC8A1                     |                           |                               |                                | PTGS2                      | ROCK1                  | PARD3B           |                        | CRYL1                        |                        |
| AQP2                       |                           |                               |                                | IRX2                       | SH3BGRL                | SEMA3E           |                        | SLC5A12                      |                        |
| AVPR2                      |                           |                               |                                | PPP1R1B                    | RASD1                  | MYO1E            |                        | KAP                          |                        |
|                            |                           |                               |                                | LIPG                       | SNCG                   | NEBL             |                        | AOAH                         |                        |
|                            |                           |                               |                                | TNNI1                      | FILIP1L                | SH2D4A           |                        | SLC13A1                      |                        |
|                            |                           |                               |                                | LRRC66                     | FLNA                   | TDRD5            |                        | ABCC2                        |                        |
|                            |                           |                               |                                | IGF1                       | MEF2C                  | PTH1R            |                        | PKHD1                        |                        |
|                            |                           |                               |                                |                            | CSTB                   | IQGAP2           |                        | SLC9A8                       |                        |
|                            |                           |                               |                                |                            | SMARCA5                | CTGF             |                        | SLC22A19                     |                        |

Supplementary table 2

Biomarkers in 10 types of kidney cells adpoted from Panglao single cell database

Oscar Franzén, Li-Ming Gan, Johan L M Björkegren, PanglaoDB: a web server for exploration of mouse and human single-cell RNA sequencing data, Database, Volume 2019, 2019, baz046, doi:10.1093/database/baz046

| Kidney_Distal<br>tubule cells | Kidney_Interc<br>alated cells | Kidney_Juxta<br>glomerular<br>cells | Kidney_Kidne<br>y progenitor<br>cells | Kidney_Loop<br>of Henle cells | Kidney_Mesa<br>ngial cells | Kidney_Podoc<br>ytes | Kidney_Princi<br>pal cells | Kidney_Proxi<br>mal tubule<br>cells | Kidney_Transi<br>ent cells |
|-------------------------------|-------------------------------|-------------------------------------|---------------------------------------|-------------------------------|----------------------------|----------------------|----------------------------|-------------------------------------|----------------------------|
|                               |                               |                                     |                                       |                               | PDE3A                      | FAT1                 |                            | TMEM27                              |                            |
|                               |                               |                                     |                                       |                               | MAP3K20                    | ILDR2                |                            | SCIN                                |                            |
|                               |                               |                                     |                                       |                               |                            | FOXD1                |                            | ALPL                                |                            |
|                               |                               |                                     |                                       |                               |                            | TRIB2                |                            | G6PC                                |                            |
|                               |                               |                                     |                                       |                               |                            | LOXL2                |                            | KEG1                                |                            |
|                               |                               |                                     |                                       |                               |                            | COL4A5               |                            | SLC22A13                            |                            |
|                               |                               |                                     |                                       |                               |                            | FOXC1                |                            | SLC22A7                             |                            |
|                               |                               |                                     |                                       |                               |                            | PLEKHH2              |                            | SLC16A9                             |                            |
|                               |                               |                                     |                                       |                               |                            | CTNNAL1              |                            | AGXT2                               |                            |
|                               |                               |                                     |                                       |                               |                            | DACH1                |                            | SORD                                |                            |
|                               |                               |                                     |                                       |                               |                            | SULF1                |                            | SOD3                                |                            |
|                               |                               |                                     |                                       |                               |                            | HSPB8                |                            | HNF4A                               |                            |
|                               |                               |                                     |                                       |                               |                            | KANK1                |                            | NME4                                |                            |
|                               |                               |                                     |                                       |                               |                            | ADCY1                |                            | APOE                                |                            |
|                               |                               |                                     |                                       |                               |                            | DOCK5                |                            | HGD                                 |                            |
|                               |                               |                                     |                                       |                               |                            | CRB2                 |                            | OSGIN1                              |                            |
|                               |                               |                                     |                                       |                               |                            | LRRC49               |                            | HSD11B1                             |                            |
|                               |                               |                                     |                                       |                               |                            | CORO2B               |                            | SERPINF2                            |                            |
|                               |                               |                                     |                                       |                               |                            | ARHGAP24             |                            | HAAO                                |                            |
|                               |                               |                                     |                                       |                               |                            | GPRC5A               |                            | PPIC                                |                            |
|                               |                               |                                     |                                       |                               |                            | COL4A4               |                            | TFF3                                |                            |
|                               |                               |                                     |                                       |                               |                            | AIF1L                |                            | GNG13                               |                            |
|                               |                               |                                     |                                       |                               |                            | MET                  |                            | SLC23A3                             |                            |
|                               |                               |                                     |                                       |                               |                            | EPB41L5              |                            | GC                                  |                            |
|                               |                               |                                     |                                       |                               |                            | DOCK1                |                            | CACNG5                              |                            |
|                               |                               |                                     |                                       |                               |                            | AJUBA                |                            | TGFBI                               |                            |
|                               |                               |                                     |                                       |                               |                            | CD2AP                |                            | RBP4                                |                            |
|                               |                               |                                     |                                       |                               |                            | GOLIM4               |                            | NAPSA                               |                            |
|                               |                               |                                     |                                       |                               |                            | ZBTB8A               |                            |                                     |                            |
|                               |                               |                                     |                                       |                               |                            | QK                   |                            |                                     |                            |
|                               |                               |                                     |                                       |                               |                            | TOB1                 |                            |                                     |                            |
|                               |                               |                                     |                                       |                               |                            | WSB2                 |                            |                                     |                            |
|                               |                               |                                     |                                       |                               |                            | EMC2                 |                            |                                     |                            |
|                               |                               |                                     |                                       |                               |                            | EHD4                 |                            |                                     |                            |
|                               |                               |                                     |                                       |                               |                            | ZFP91                |                            |                                     |                            |
|                               |                               |                                     |                                       |                               |                            | ETF1                 |                            |                                     |                            |
|                               |                               |                                     |                                       |                               |                            | EMC7                 |                            |                                     |                            |
|                               |                               |                                     |                                       |                               |                            | LUC7L2               |                            |                                     |                            |
|                               |                               |                                     |                                       |                               |                            | MAPT                 |                            |                                     |                            |
|                               |                               |                                     |                                       |                               |                            | CDKN1C               |                            |                                     |                            |
